# Supplementary material
Source: PubMed Central journal article supplement (PMC3498987)

Supporting Information

© Wiley-VCH 2010

69451 Weinheim, Germany

**Quaternary Carbon Stereogenic Centers through Copper-Catalyzed Enantioselective Allylic Substitutions with Readily Accessible Aryl- or Heteroaryllithium Reagents and Aluminum Chlorides\*\***

*Fang Gao, Yunmi Lee, Kyoko Mandai, and Amir H. Hoveyda\**

anie\_201005124\_sm\_miscellaneous\_information.pdf

## SUPPORTING INFORMATION, PART A

**General.** Infrared (IR) spectra were recorded on a Bruker FT-IR Alpha (ATR mode) spectrophotometer,  $\nu_{\max}$  in  $\text{cm}^{-1}$ . Bands are characterized as broad (br), strong (s), medium (m), and weak (w).  $^1\text{H}$  NMR spectra were recorded on a Varian Unity INOVA 400 (400 MHz) spectrometer. Chemical shifts are reported in ppm from tetramethylsilane with the solvent resonance as the internal standard ( $\text{CDCl}_3$ : 7.26 ppm). Data are reported as follows: chemical shift, integration, multiplicity (s = singlet, d = doublet, t = triplet, q = quartet, m = multiplet), and coupling constants (Hz).  $^{13}\text{C}$  NMR spectra were recorded on a Varian Unity INOVA 400 (100 MHz) spectrometer with complete proton decoupling. Chemical shifts are reported in ppm from tetramethylsilane with the solvent resonance as the internal standard ( $\text{CDCl}_3$ : 77.16 ppm). High-resolution mass spectrometry was performed on a Micromass LCT ESI-MS (positive mode) at the Mass Spectrometry Facility, Boston College. Enantiomer ratios were determined by GLC analysis (Alltech Associated Chiral dex GTA column (30 m x 0.25 mm) and Betadex 120 column (30 m x 0.25 mm)) and HPLC analysis (high-performance liquid chromatography) with a Shimadzu chromatograph (Chiral Technologies Chiralcel OD (4.6 x 250 mm), Chiral Technologies Chiralpak AD (4.6 x 250 mm), Chiral Technologies Chiralcel OB-H (4.6 x 250 mm), Chiral Technologies Chiralcel OJ-H (4.6 x 250 mm), Chiral Technologies Chiralcel OD-H (4.6 x 250 mm), or Chiral Technologies Chiralpak AD-H (4.6 x 250 mm)) in comparison with authentic racemic materials. Specific rotations were measured on a Rudolph Research Analytical Autopol IV Polarimeter.

Unless otherwise noted, all reactions were carried out with distilled and degassed solvents under an atmosphere of dry  $\text{N}_2$  in oven- (135 °C) or flame-dried glassware with standard dry box or vacuum-line techniques. Pentane and dichloromethane (Fisher Scientific) were purified by passing through two alumina columns under a positive pressure of dry argon by a modified Innovative Technologies purification system. Tetrahydrofuran (Aldrich Chemical Co.) was purified by distillation from sodium benzophenone ketyl immediately prior to use unless otherwise specified. All work-up and purification procedures were carried out with reagent grade solvents (purchased from Fisher Scientific) under air. All substrates are prepared according to

previously reported procedures;<sup>1</sup> all substrates possess *E*-olefin geometry and purities are established by <sup>1</sup>H NMR analysis (400 MHz).

### ■ Reagents and Ligands:

**Ag-NHC complex 1:** prepared according to a previously reported procedure.<sup>2</sup>

**Ag-NHC complex 2a:** prepared according to a previously reported procedure.<sup>3</sup>

**Ag-NHC complex 2b:** prepared according to a previously reported procedure.<sup>4</sup>

**Ag-NHC complex 2c:** prepared according to a previously reported procedure.<sup>5</sup>

**Ag-NHC complex 3 and 4:** prepared according to a previously reported procedure.<sup>6</sup>

**9-Borabicyclo[3.3.1]nonane (0.5 M in thf):** purchased from Aldrich Chemical Co. and used as received.

**4-Bromoanisole:** purchased from Aldrich Chemical Co. and purified by distillation over CaH<sub>2</sub>.

**3-Bromofuran:** purchased from Aldrich Chemical Co. and purified by distillation over sodium.

**3-Bromothiophene:** purchased from Aldrich Chemical Co. and purified by distillation over CaH<sub>2</sub>.

**1-Bromo-4-(trifluoromethyl)benzene:** purchased from Aldrich Chemical Co. and purified by distillation over CaH<sub>2</sub>.

***n*-Butyllithium (15% in hexanes):** purchased from Strem Chemicals Inc. and titrated before use.

***t*-Butyllithium (16% in pentane):** purchased from Strem Chemicals Inc. and titrated before use.

**Copper(II) dichloride bishydrate:** purchased from Aldrich Chemical Co. and used as received.

**Diethylaluminum chloride:** purchased from Aldrich Chemical Co. and used as received.

**Diethylphenylaluminum:** prepared according to a previously reported procedure.<sup>7</sup>

**Furan:** purchased from Aldrich Chemical Co. and purified by distillation over sodium.

**Hydrogen peroxide (35% wt solution in water):** purchased from Aldrich Chemical Co. and used as received.

**Magnesium turning:** purchased from Strem Chemicals Inc. and used as received.

**Methylmagnesium iodide:** prepared from iodomethane and Mg turning in Et<sub>2</sub>O.

---

[1] a) C. A. Luchaco-Cullis, H. Mizutani, K. E. Murphy, A. H. Hoveyda, *Angew. Chem. Int. Ed.* **2001**, *40*, 1456–1460. b) M. A. Kacprzyński, T. L. May, S. A. Kazane, A. H. Hoveyda, *Angew. Chem. Int. Ed.* **2007**, *46*, 4554–4558. c) Y. Lee, A. H. Hoveyda, *J. Am. Chem. Soc.* **2006**, *128*, 15604–15605. d) F. Gao, K. P. McGrath, Y. Lee, A. H. Hoveyda, *J. Am. Chem. Soc.* **2010**, Submitted for publication.

[2] J. J. Van Veldhuizen, J. E. Campbell, R. E. Giudici, A. H. Hoveyda, *J. Am. Chem. Soc.* **2005**, *127*, 6877–6882.

[3] M. K. Brown, T. L. May, C. A. Baxter, A. H. Hoveyda, *Angew. Chem. Int. Ed.* **2007**, *46*, 1097–1100.

[4] Y. Lee, K. Akiyama, D. G. Gillingham, M. K. Brown, A. H. Hoveyda, *J. Am. Chem. Soc.* **2008**, *130*, 446–447.

[5] K. Akiyama, F. Gao, A. H. Hoveyda, *Angew. Chem. Int. Ed.* **2010**, *49*, 419–423.

[6] K-s. Lee, A. H. Hoveyda, *J. Org. Chem.* **2009**, *74*, 4455–4462.

[7] T. L. May, M. K. Brown, A. H. Hoveyda, *Angew. Chem. Int. Ed.* **2008**, *47*, 7358–7362.

**N-Methylpyrrole:** purchased from Aldrich Chemical Co. and purified by distillation over CaH<sub>2</sub>.

**Phenyllithium (2.0 M in Bu<sub>2</sub>O):** purchased from Acros Organics and titrated before use.

**Sodium perborate tetrahydrate:** purchased from Aldrich Chemical Co. and used as received.

**Thiophene:** purchased from Aldrich Chemical Co. and purified by distillation over CaH<sub>2</sub>.

■ **Representative Experimental Procedure for the Preparation of Diethylarylaluminum Reagents:**<sup>7</sup> Under a N<sub>2</sub> atmosphere, 4-bromoanisole (626 μL, 5.0 mmol) and tetrahydrofuran (thf, 700 μL) are placed in a flame-dried round bottom flask equipped with a stir bar. The solution is allowed to cool to -78 °C (dry ice/acetone bath). *n*-Butyllithium (1.61 M in hexanes, 3.10 mL, 5.0 mmol) is added through a syringe dropwise over ten minutes and the resulting mixture is allowed to stir at -78 °C for 1 h. Pentane (3.0 mL), followed by diethylaluminum chloride (690 μL, 5.5 mmol) is added to the solution through syringes and the suspension of white precipitate is allowed to warm to 22 °C and stir for 12 h. After that time, the resulting mixture is allowed to stand for 30 minutes to assist with the settling of white solid (LiCl) and the colorless supernatant (diethyl(4-methoxyphenyl)aluminum, 0.616 M) is used directly without further purification.

■ **Experimental Procedure for the Preparation of Diethyl(2-furyl)aluminum Reagent:** Under a N<sub>2</sub> atmosphere, furan (727 μL, 10.0 mmol) and tetrahydrofuran (thf, 1.4 mL) are added to a flame-dried round bottom flask equipped with a stir bar through syringes. The solution is allowed to cool to -78 °C (dry ice/acetone bath). *n*-Butyllithium (1.61 M in hexanes, 6.21 mL, 10.0 mmol) is added through a syringe and the resulting yellow solution is allowed to stir at 0 °C for 1 h, after which time the solution is allowed to cool to -78 °C again. Pentane (5.6 mL), followed by diethylaluminum chloride (1.38 mL, 11.0 mmol) is added to the solution through syringes and the mixture is allowed to warm to 22 °C and stir for 12 h. The resulting mixture is allowed to stand for 30 minutes to assist with the settling of white solid (LiCl) and the clear yellow supernatant (diethyl(2-furyl)aluminum, 0.653 M) is used directly without further purification.

■ **Diethyl(2-thienyl)aluminum Reagent:** prepared the same way as diethyl(2-furyl)aluminum reagent and used as supernatant without further purification.

■ **Experimental Procedure for the Preparation of Diethyl(3-furyl)aluminum Reagent:** Under a N<sub>2</sub> atmosphere, 3-bromofuran (449 μL, 5.0 mmol) and diethyl ether (Et<sub>2</sub>O, 3.1 mL) are added to a flame-dried round bottom flask equipped with a stir bar through syringes. The solution is allowed to cool to -78 °C (dry ice/acetone bath). *n*-Butyllithium (1.61 M in hexanes, 3.1 mL, 5.0 mmol) is added through a syringe and the resulting yellow mixture is allowed to stir at -78 °C for 1 h. Diethylaluminum chloride (690 μL, 5.5 mmol) is added to the solution through a syringe and the mixture is allowed to warm to 22 °C and stir for 12 h. The resulting mixture is allowed to stand for 30 minutes to assist with the settling of white solid (LiCl) and the clear yellow supernatant (diethyl(3-furyl)aluminum, 0.681 M) is used directly without further purification.

■ **Diethyl(3-thienyl)aluminum Reagent:** prepared the same way as diethyl(3-furyl)aluminum reagent and used as supernatant without further purification.

■ **Experimental Procedure for the Preparation of Diethyl(2-pyrryl)aluminum Reagent:** Under an N<sub>2</sub> atmosphere, *N*-methylpyrrole (444  $\mu$ L, 5.0 mmol) and diethyl ether (Et<sub>2</sub>O, 3.1 mL) are added to a flame-dried round bottom flask equipped with a stir bar through syringes. The solution is allowed to cool to  $-78$  °C (dry ice/acetone bath). *t*-Butyllithium (1.62 M in pentane, 3.1 mL, 5.0 mmol) is added through a syringe and the resulting yellow solution is allowed to stir at  $0$  °C for 1 h. White solid is generated and the mixture is allowed to cool to  $-78$  °C. Diethylaluminum chloride (690  $\mu$ L, 5.5 mmol) is added to the solution through a syringe and the mixture is allowed to warm to  $22$  °C and stir for 12 h. The resulting mixture is allowed to stand for 30 minutes to assist with the settling of white solid (LiCl) and the clear orange supernatant (diethyl(2-pyrryl)aluminum, 0.682 M) is used directly without further purification.

■ **Representative Experimental Procedure for Cu-Catalyzed Enantioselective Allylic Substitution Reactions of Diethylaryl/heteroarylaluminum Reagents to Allylic Phosphates:**

In an N<sub>2</sub> filled glove box, an oven-dried vial (8 mL, 17 x 60 mm) with a magnetic stir bar is charged with NHC-Ag(I) complex **2a** (0.9 mg,  $7.5 \times 10^{-4}$  mmol) and sealed with a septum before removal from the glove box. To the vial under an N<sub>2</sub> atmosphere are added tetrahydrofuran (thf, 0.5 mL) and a solution of CuCl<sub>2</sub>•2H<sub>2</sub>O (0.02 M in thf, 75  $\mu$ L,  $1.50 \times 10^{-3}$  mmol). The light blue solution is allowed to stir at  $22$  °C for 30 minutes and a solution of (*E*)-*tert*-butyl-4-(diethoxyphosphoryloxy)-2-methylbut-2-enoate (46.2 mg, 0.150 mmol) in thf (0.5 mL) is added through a syringe. After stirring for 10 minutes, the reaction mixture is allowed to cool to  $-78$  °C (dry ice/acetone bath). A solution of diethylphenylaluminum reagent (0.622 M in pentane, 723  $\mu$ L, 0.450 mmol) is added slowly through a syringe. The vial is transferred to a  $-30$  °C cryocool. After 1 h, the reaction solution is allowed to cool to  $-78$  °C and quenched by addition of a saturated aqueous solution of Rochelle's salt (potassium sodium tartrate, 2 mL). The aqueous layer is washed with Et<sub>2</sub>O (3 x 1 mL) and the combined organic layers are passed through a short plug of MgSO<sub>4</sub> and silica gel. The filtrate is concentrated under reduced pressure to provide colorless oil residue, which is purified by silica gel column chromatography (30:1 pentane:Et<sub>2</sub>O) to afford product **6** as colorless oil (34.2 mg, 0.147 mmol, 98% yield). (*R*)-*tert*-Butyl 2-methyl-2-phenylbut-3-enoate (**6**): The compound has been previously reported and spectra data match those previously described.<sup>8</sup> <sup>1</sup>H NMR (400 MHz, CDCl<sub>3</sub>):  $\delta$  7.33–7.22 (5H, m), 6.37 (1H, dd, *J* = 17.6, 10.8 Hz), 5.25 (1H, dd, *J* = 10.8, 1.2 Hz), 5.13 (1H, dd, *J* = 17.6, 1.2 Hz), 1.58 (3H, s), 1.41 (9H, s); <sup>13</sup>C NMR (100 MHz, CDCl<sub>3</sub>):  $\delta$  174.0, 144.3, 141.7, 128.4, 126.7, 126.5, 114.6, 81.1, 54.4, 28.0, 23.6. Specific Rotation:  $[\alpha]_D^{20} +3.49$  (*c* 1.06, CHCl<sub>3</sub>) for an enantiomerically enriched sample of 90.5:9.5 er.

**Proof of Stereochemistry:** Literature value ( $[\alpha]_D^{20} -3.05$  (*c* 0.747, CHCl<sub>3</sub>), 94.5:5.5 er) is assigned to the (*S*) enantiomer.<sup>8</sup>

[8] K. E. Murphy, A. H. Hoveyda, *Org. Lett.* **2005**, *7*, 1255–1258.

Enantiomeric purity is determined by GLC analysis in comparison with authentic racemic material (91.1:8.9 er shown;  $\beta$ -dex column, 15 psi, 90 °C).

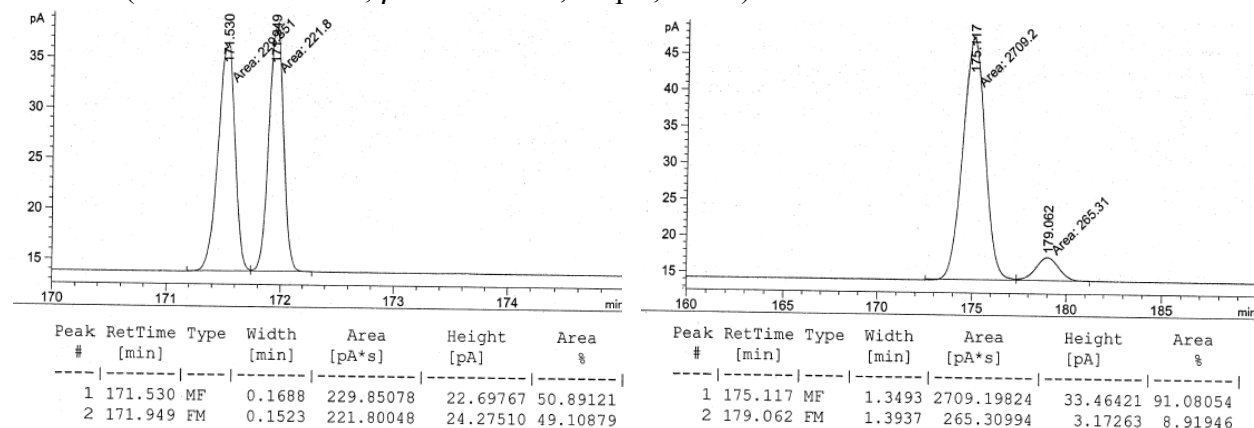

| Peak # | Time (mins) | Area (%) | Peak # | Time (mins) | Area (%) |
|--------|-------------|----------|--------|-------------|----------|
| 1      | 171.530     | 50.9     | 1      | 175.117     | 91.1     |
| 2      | 171.949     | 49.1     | 2      | 179.062     | 8.9      |

**(R)-tert-Butyl 2-ethyl-2-phenylbut-3-enoate (Entry 2, Table 2):** The compound has been previously reported and spectra data match those described.<sup>8</sup> <sup>1</sup>H NMR (400 MHz, CDCl<sub>3</sub>):  $\delta$  7.31–7.18 (5H, m), 6.35 (1H, dd,  $J$  = 17.6, 10.8 Hz), 5.25 (1H, dd,  $J$  = 11.2, 1.2 Hz), 4.97 (1H, dd,  $J$  = 17.6, 1.2 Hz), 2.15 (1H, dq,  $J$  = 14.0, 7.6 Hz), 2.06 (1H, dq,  $J$  = 13.6, 7.2 Hz), 1.39 (9H, s), 0.84 (3H, t,  $J$  = 7.2 Hz); <sup>13</sup>C NMR (100 MHz, CDCl<sub>3</sub>):  $\delta$  173.6, 142.7, 140.3, 128.1, 127.4, 126.6, 115.7, 81.0, 58.5, 29.5, 28.0, 9.5. Specific Rotation:  $[\alpha]_D^{20}$  +12.4 ( $c$  1.00, CHCl<sub>3</sub>) for an enantiomerically enriched sample of 91:9 er.

**Proof of Stereochemistry:** Literature value ( $[\alpha]_D^{20}$  +14.3 ( $c$  0.493, CHCl<sub>3</sub>), 89.5:10.5 er) is assigned to the (S) enantiomer.<sup>8</sup>

Enantiomeric purity was determined by GLC analysis in comparison with authentic racemic material obtained from the derived methyl ester derivative, which was prepared by deprotection of *tert*-butyl ester with trifluoroacetic acid in CH<sub>2</sub>Cl<sub>2</sub>, followed by methylation of the derived acid with MeI and K<sub>2</sub>CO<sub>3</sub> in dmf (91.4:8.6 er shown; Chiral dex GTA column, 15 psi, 90 °C).

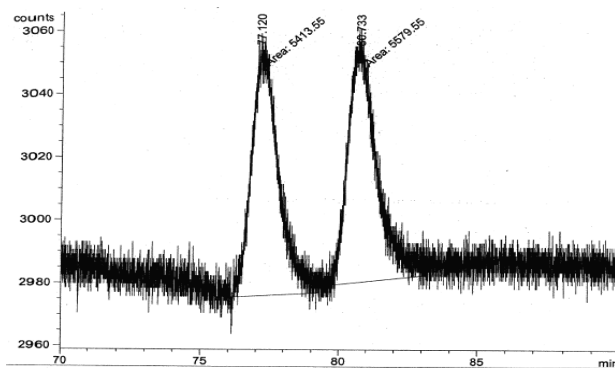

| Peak # | RetTime [min] | Type | Width [min] | Area counts*s | Height [counts] | Area %   |
|--------|---------------|------|-------------|---------------|-----------------|----------|
| 1      | 77.120        | MM   | 1.0694      | 5413.54980    | 84.37312        | 49.24500 |
| 2      | 80.733        | MM   | 1.1414      | 5579.54541    | 81.47540        | 50.75500 |

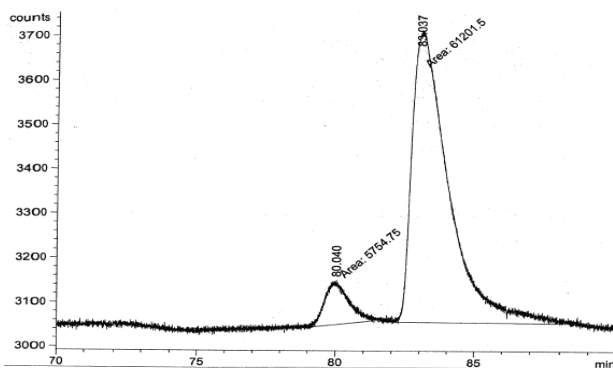

| Peak # | RetTime [min] | Type | Width [min] | Area counts*s | Height [counts] | Area %   |
|--------|---------------|------|-------------|---------------|-----------------|----------|
| 1      | 80.040        | MM   | 0.9496      | 5754.75000    | 101.00825       | 8.59479  |
| 2      | 83.037        | MM   | 1.5399      | 61201.5e4     | 662.41803       | 91.40521 |

| Peak # | Time (mins) | Area (%) | Peak # | Time (mins) | Area (%) |
|--------|-------------|----------|--------|-------------|----------|
| 1      | 77.120      | 49.2     | 1      | 80.040      | 8.6      |
| 2      | 80.733      | 50.8     | 2      | 83.037      | 91.4     |

**(R)-tert-Butyl 2-(4-methoxyphenyl)-2-methylbut-3-enoate (Entry 3, Table 2).** IR (neat): 2979 (w), 1721 (s), 1610 (w), 1510 (s), 1367 (m), 1247 (s), 1161 (s), 1122 (s), 1034 (m), 920 (w), 831 (m)  $\text{cm}^{-1}$ ;  $^1\text{H}$  NMR (400 MHz,  $\text{CDCl}_3$ ):  $\delta$  7.19 (2H, d,  $J = 8.8$  Hz), 6.84 (2H, d,  $J = 9.2$  Hz), 6.37 (1H, dd,  $J = 17.6, 10.4$  Hz), 5.22 (1H, dd,  $J = 10.8, 1.2$  Hz), 5.11 (1H, dd,  $J = 17.2, 0.8$  Hz), 3.78 (3H, s), 1.54 (3H, s), 1.40 (9H, s);  $^{13}\text{C}$  NMR (100 MHz,  $\text{CDCl}_3$ ):  $\delta$  174.2, 158.3, 142.0, 136.3, 127.7, 114.3, 113.7, 81.0, 55.4, 53.7, 28.0, 23.6; HRMS (ESI+): Calcd for  $\text{C}_{16}\text{H}_{26}\text{N}_1\text{O}_3$   $[\text{M}+\text{NH}_4]^+$ : 280.1913, Found: 280.1914. Specific Rotation:  $[\alpha]_{\text{D}}^{20} \square 4.11$  ( $c$  1.72,  $\text{CHCl}_3$ ) for an enantiomerically enriched sample of 90.5:9.5 er.

Enantiomeric purity was determined by HPLC analysis in comparison with authentic racemic material obtained from the derived methyl ester derivative, which was prepared by deprotection of *tert*-butyl ester with trifluoroacetic acid in  $\text{CH}_2\text{Cl}_2$ , followed by methylation of the derived acid with MeI and  $\text{K}_2\text{CO}_3$  in dmf (90.7:9.3 er shown; Chiralcel OB-H column, 99.8/0.2 hexanes/*i*-PrOH, 0.5 mL/min, 220 nm).

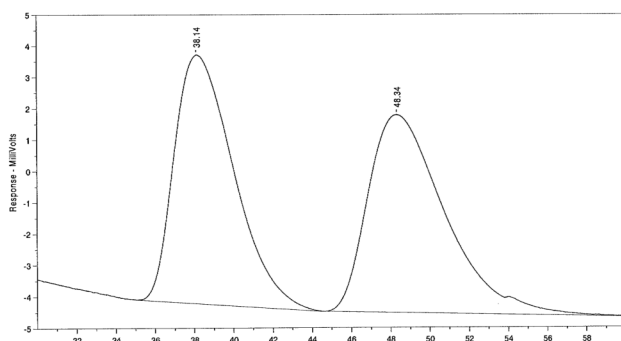

| Peak # | Ret. Time | Name | Amount | Amt % | Area    | Area % | Type | Width |
|--------|-----------|------|--------|-------|---------|--------|------|-------|
| 1      | 38.14     |      | 0.00   | N/A   | 1678006 | 49.442 | BB   | 3.38  |
| 2      | 48.34     |      | 0.00   | N/A   | 1715913 | 50.558 | BB   | 4.19  |

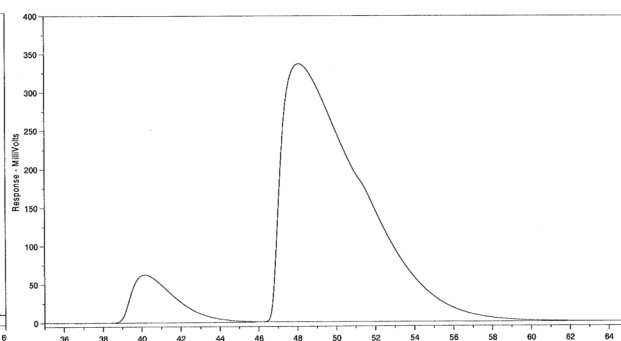

| Peak # | Ret. Time | Name | Amount | Amt % | Area     | Area % | Type | Width |
|--------|-----------|------|--------|-------|----------|--------|------|-------|
| 1      | 40.16     |      | 0.00   | N/A   | 9756891  | 9.271  | BB   | 2.41  |
| 2      | 48.10     |      | 0.00   | N/A   | 95480230 | 90.729 | BB   | 4.53  |

| Peak # | Time (mins) | Area (%) | Peak # | Time (mins) | Area (%) |
|--------|-------------|----------|--------|-------------|----------|
| 1      | 38.14       | 49.4     | 1      | 40.16       | 9.3      |
| 2      | 48.34       | 50.6     | 2      | 48.10       | 90.7     |

**(R)-tert-Butyl 2-methyl-2-(4-(trifluoromethyl)phenyl)but-3-enoate (Entry 4, Table 2).** IR (neat): 1725 (m), 1369 (m), 1324 (s), 1253 (m), 1161 (s), 1121 (s), 1078 (s), 1016 (s), 924 (m), 842 (m)  $\text{cm}^{-1}$ ;  $^1\text{H}$  NMR (400 MHz,  $\text{CDCl}_3$ ):  $\delta$  7.56 (2H, d,  $J = 8.8$  Hz), 7.38 (2H, d,  $J = 8.4$  Hz), 6.33 (1H, dd,  $J = 17.6, 17.2$  Hz), 5.30 (1H, d,  $J = 11.6$  Hz), 5.15 (1H, d,  $J = 17.6$  Hz), 1.58 (3H, s), 1.41 (9H, s);  $^{13}\text{C}$  NMR (100 MHz,  $\text{CDCl}_3$ ):  $\delta$  173.0, 148.0, 140.6, 128.8 (q,  $J = 32.0$  Hz), 126.8, 126.1 (q,  $J = 270.9$  Hz), 125.1 (q,  $J = 4.4$  Hz), 115.2, 81.4, 54.3, 27.7, 23.3; HRMS (ESI+): Calcd for  $\text{C}_{16}\text{H}_{23}\text{F}_3\text{N}_1\text{O}_2$   $[\text{M}+\text{NH}_4]^+$ : 318.1681, Found: 318.1693. Specific Rotation:  $[\alpha]_{\text{D}}^{20} +2.30$  ( $c$  1.57,  $\text{CHCl}_3$ ) for an enantiomerically enriched sample of 83:17 er.

Enantiomeric purity was determined by GLC analysis in comparison with authentic racemic material (82.9:17.1 er shown;  $\beta$ -dex column, 15 psi, 90 °C).

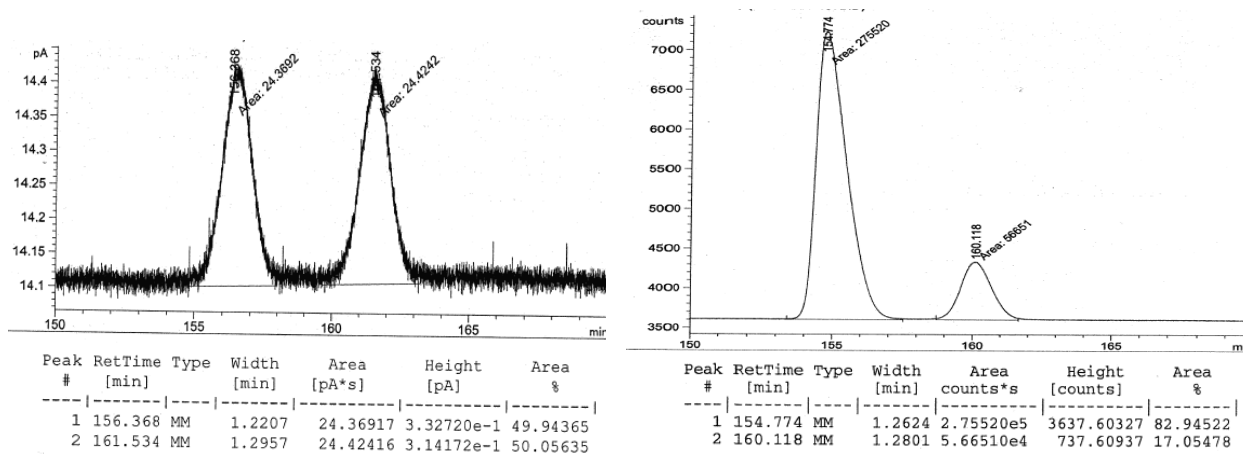

| Peak # | Time (mins) | Area (%) | Peak # | Time (mins) | Area (%) |
|--------|-------------|----------|--------|-------------|----------|
| 1      | 156.368     | 49.9     | 1      | 154.774     | 82.9     |
| 2      | 161.534     | 50.1     | 2      | 160.118     | 17.1     |

**(R)-Dimethyl(phenyl)(2-phenylbut-3-en-2-yl)silane (Entry 5, Table 2):** The compound has been previously reported and spectra data match those described.<sup>1b</sup>  $^1\text{H}$  NMR (400 MHz,  $\text{CDCl}_3$ ):  $\delta$  7.37–7.06 (10H, m), 6.47 (1H, dd,  $J = 17.2, 10.8$  Hz), 5.09 (1H, dd,  $J = 10.8, 1.6$  Hz), 4.94 (1H, dd,  $J = 17.2, 1.2$  Hz), 1.46 (3H, s), 0.24 (3H, s), 0.23 (3H, s);  $^{13}\text{C}$  NMR (100 MHz,  $\text{CDCl}_3$ ):  $\delta$  145.5, 143.1, 136.6, 135.0, 129.2, 127.9, 127.4, 126.6, 124.7, 111.4, 37.6, 19.0,  $\square$ 5.1,  $\square$ 5.2. Specific Rotation:  $[\alpha]_{\text{D}}^{20} -15.7$  ( $c$  1.00,  $\text{CHCl}_3$ ) for an enantiomerically enriched sample of 96:4 er.



**Proof of Stereochemistry:** Literature value ( $[\alpha]_D^{20}$   $\square$  17.1 (*c* 0.513, CHCl<sub>3</sub>), 92.5:7.5 er) is assigned to the (*R*) enantiomer.<sup>1b</sup>

Enantiomeric purity is determined by HPLC analysis of the derived primary alcohol (obtained from hydroboration of the terminal olefin with 9-BBN, followed by oxidation with H<sub>2</sub>O<sub>2</sub>) in comparison with authentic racemic material (95.8:4.2 er shown; Chiralcel OD column, 98/2 hexanes/*i*-PrOH, 1.0 mL/min, 220 nm).

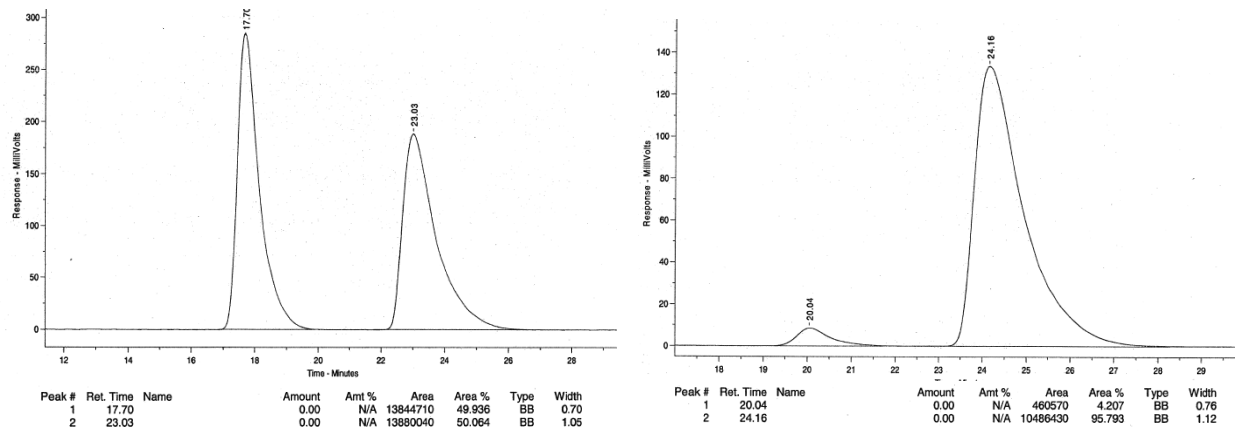

| Peak # | Time (mins) | Area (%) | Peak # | Time (mins) | Area (%) |
|--------|-------------|----------|--------|-------------|----------|
| 1      | 17.70       | 49.9     | 1      | 20.04       | 4.2      |
| 2      | 23.03       | 50.1     | 2      | 24.16       | 95.8     |

**(*R*)-(2-(4-Methoxyphenyl)but-3-en-2-yl)dimethyl(phenyl)silane (Entry 6, Table 2):** The compound has been previously reported and spectra data match those described.<sup>1b</sup> <sup>1</sup>H NMR (400 MHz, CDCl<sub>3</sub>):  $\delta$  7.38  $\square$  7.26 (5H, m), 6.99 (2H, d, *J* = 8.8 Hz), 6.76 (2H, d, *J* = 8.8 Hz), 6.41 (1H, dd, *J* = 17.2, 10.8 Hz), 5.07 (1H, dd, *J* = 10.8, 1.6 Hz), 4.98 (1H, dd, *J* = 17.2, 1.2 Hz), 3.78 (3H, s), 1.43 (3H, s), 0.24 (3H, s), 0.23 (3H, s); <sup>13</sup>C NMR (100 MHz, CDCl<sub>3</sub>):  $\delta$  157.0, 143.4, 137.7, 136.9, 135.1, 129.3, 127.7, 127.5, 113.4, 111.3, 55.4, 36.8, 19.4,  $\square$  5.0,  $\square$  5.0. Specific Rotation:  $[\alpha]_D^{20}$  -22.9 (*c* 2.22, CHCl<sub>3</sub>) for an enantiomerically enriched sample of 97:3 er sample.

**Proof of Stereochemistry:** Literature value ( $[\alpha]_D^{20}$   $\square$  4.38 (*c* 0.213, CHCl<sub>3</sub>), 95:5 er) is assigned to the (*R*) enantiomer.<sup>1b</sup>

Enantiomeric purity is determined by HPLC analysis of the derived primary alcohol (obtained from hydroboration of the terminal olefin with 9-BBN, followed by oxidation with H<sub>2</sub>O<sub>2</sub>) in comparison with authentic racemic material (95.8:4.2 er shown; Chiralcel AD column, 99/1 hexanes/*i*-PrOH, 1.0 mL/min, 220 nm).

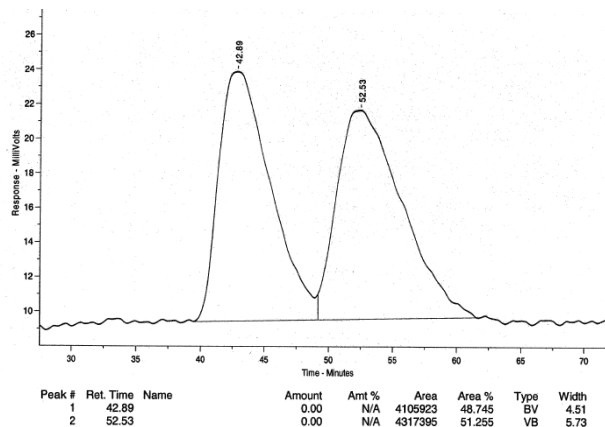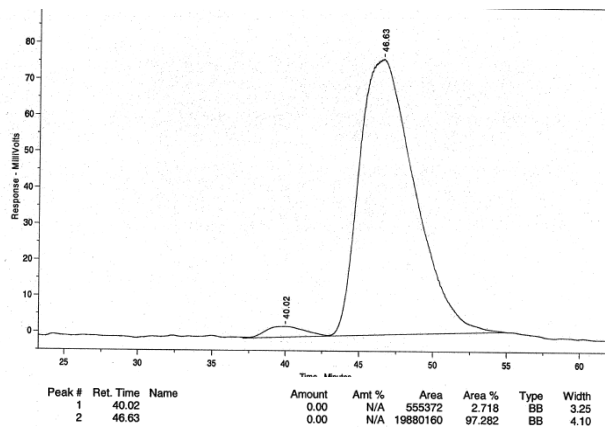

| Peak # | Time (mins) | Area (%) | Peak # | Time (mins) | Area (%) |
|--------|-------------|----------|--------|-------------|----------|
| 1      | 42.89       | 48.7     | 1      | 40.02       | 2.7      |
| 2      | 52.53       | 51.3     | 2      | 46.63       | 97.3     |

**(R)-1-Bromo-2-(2-phenylbut-3-en-2-yl)benzene (8, Eq 1):** IR (neat): 3084 (w), 3057 (w), 2977 (w), 1492 (w), 1467 (m), 1446 (m), 1425 (w), 1020 (m), 918 (m), 753 (s), 698 (s), 601 (w)  $\text{cm}^{-1}$ ;  $^1\text{H}$  NMR (400 MHz,  $\text{CDCl}_3$ ):  $\delta$  7.60 (1H, dd,  $J = 8.0, 1.6$  Hz), 7.53 (1H, dd,  $J = 8.0, 1.6$  Hz), 7.33 (1H, ddd,  $J = 7.2, 7.2, 1.6$  Hz), 7.29–7.23 (2H, m), 7.20–7.16 (1H, m), 7.13–7.08 (3H, m), 6.66 (1H, dd,  $J = 17.6, 10.8$  Hz), 5.19 (1H, ddd,  $J = 10.8, 0.8, 0.4$  Hz), 4.99 (1H, dd,  $J = 17.2, 0.8$  Hz), 1.87 (3H, s);  $^{13}\text{C}$  NMR (100 MHz,  $\text{CDCl}_3$ ):  $\delta$  147.4, 146.1, 145.1, 141.7, 135.7, 129.8, 128.6, 128.3, 128.2, 127.3, 127.0, 125.8, 124.3, 113.4, 51.5, 26.6; HRMS (ESI+): Calcd for  $\text{C}_{16}\text{H}_{16}\text{Br}$   $[\text{M}+\text{H}]^+$ : 287.0435, Found: 287.0439. Specific Rotation:  $[\alpha]_{\text{D}}^{20} = 17.3$  ( $c$  0.57,  $\text{CHCl}_3$ ) for an enantiomerically enriched sample of 94.5:5.5 er.

Enantiomeric purity is determined by HPLC analysis of the derived primary alcohol (obtained from hydroboration of the terminal olefin with 9-BBN, followed by oxidation with  $\text{H}_2\text{O}_2$ ) in comparison with authentic racemic material (94.5:5.5 er shown; Chiralcel OD column, 95/5 hexanes/*i*-PrOH, 1.0 mL/min, 220 nm).

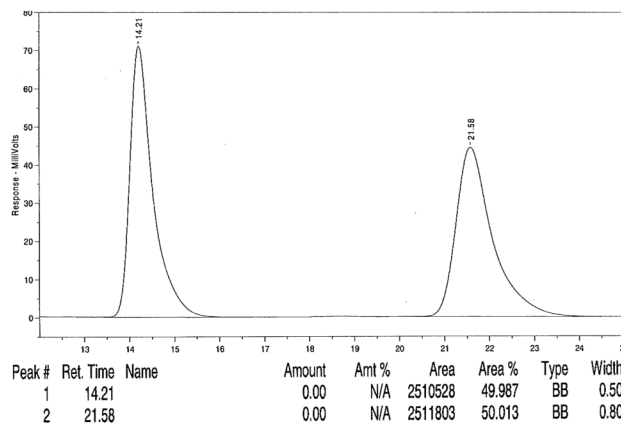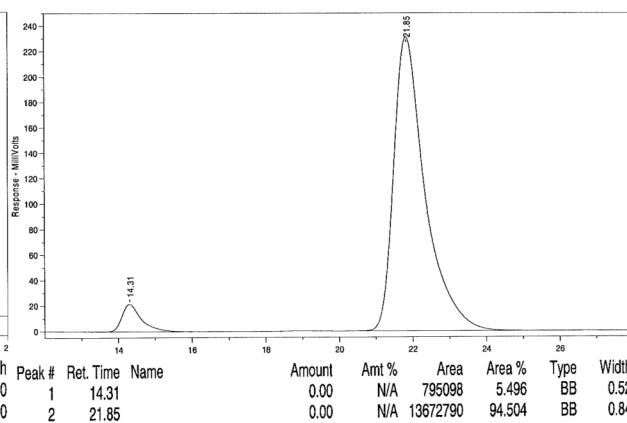

| Peak # | Time (mins) | Area (%) | Peak # | Time (mins) | Area (%) |
|--------|-------------|----------|--------|-------------|----------|
| 1      | 14.21       | 50.0     | 1      | 14.31       | 5.5      |
| 2      | 21.58       | 50.0     | 2      | 21.85       | 94.5     |

**(R)-tert-Butyl 2-(furan-2-yl)-2-methylbut-3-enoate (9, Scheme 2).** IR (neat): 2980 (w), 1729 (s), 1368 (m), 1253 (m), 1155 (s), 1116 (m), 1012 (w), 929 (w), 801 (w), 733 (m)  $\text{cm}^{-1}$ ;  $^1\text{H}$  NMR (400 MHz,  $\text{CDCl}_3$ ):  $\delta$  7.35–7.33 (1H, m), 6.29 (1H, dd,  $J = 3.2, 1.6$  Hz), 6.27 (1H, dd,  $J = 17.6, 10.8$  Hz), 6.13 (1H, dd,  $J = 3.2, 0.8$  Hz), 5.20 (1H, dd,  $J = 10.4, 0.8$  Hz), 5.09 (1H, dd,  $J = 17.2, 0.8$  Hz), 1.59 (3H, s), 1.40 (9H, s);  $^{13}\text{C}$  NMR (100 MHz,  $\text{CDCl}_3$ ):  $\delta$  172.1, 156.2, 141.8, 139.3, 114.9, 110.2, 106.0, 81.5, 51.2, 28.0, 21.6; HRMS (ESI+): Calcd for  $\text{C}_{13}\text{H}_{19}\text{O}_3$   $[\text{M}+\text{H}]^+$ : 223.1334, Found: 223.1329. Specific Rotation:  $[\alpha]_{\text{D}}^{20}$   $\square$  2.38 ( $c$  1.00,  $\text{CHCl}_3$ ) for an enantiomerically enriched sample of 99:1 er.

Enantiomeric purity was determined by GLC analysis in comparison with authentic racemic material (98.9:1.1 er shown; Chiral dex GTA column, 10 psi, 50 °C).

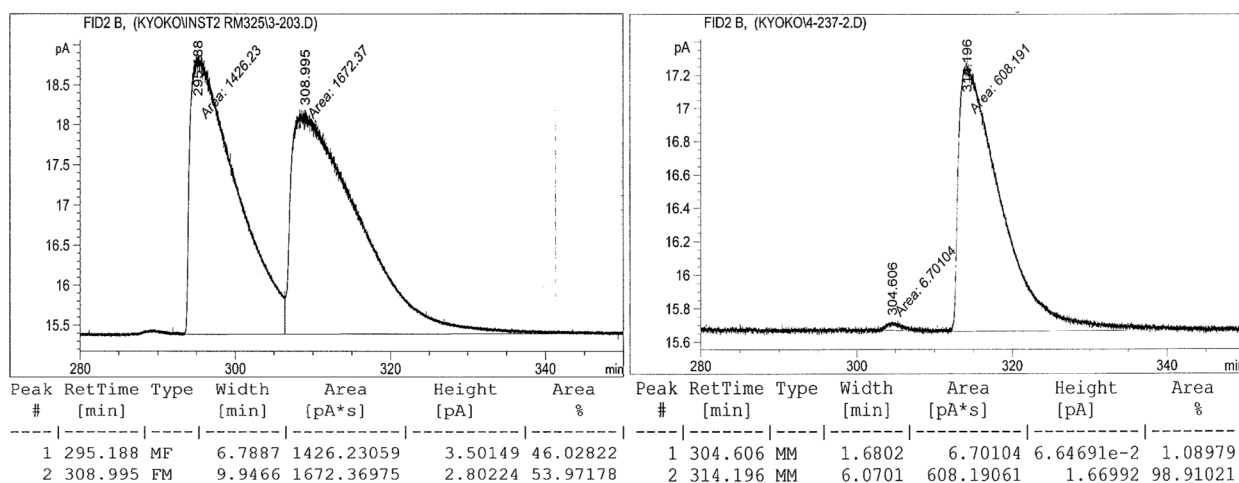

| Peak # | Time (mins) | Area (%) | Peak # | Time (mins) | Area (%) |
|--------|-------------|----------|--------|-------------|----------|
| 1      | 295.188     | 46.0     | 1      | 304.606     | 1.1      |
| 2      | 308.995     | 54.0     | 2      | 314.196     | 98.9     |

**(S)-2-(2-Phenylbut-3-en-2-yl)furan (Entry 1, Table 3).** IR (neat): 3085 (w), 3058 (w), 2979 (w), 2936 (w), 1491 (w), 1445 (w), 1409 (w), 1155 (w), 1009 (m), 922 (m), 759 (m), 730 (s), 697 (s)  $\text{cm}^{-1}$ ;  $^1\text{H}$  NMR (400 MHz,  $\text{CDCl}_3$ ):  $\delta$  7.38–7.37 (1H, m), 7.33–7.28 (2H, m), 7.25–7.18 (3H, m), 6.38 (1H, dd,  $J = 17.2, 10.4$  Hz), 6.35–6.34 (1H, m), 6.13 (1H, dd,  $J = 3.2, 0.8$  Hz), 5.23 (1H, dd,  $J = 10.8, 1.2$  Hz), 5.01 (1H, dd,  $J = 17.6, 1.2$  Hz), 1.77 (3H, s);  $^{13}\text{C}$  NMR (100 MHz,  $\text{CDCl}_3$ ):  $\delta$  159.6, 145.8, 143.5, 141.7, 128.2, 127.1, 126.5, 113.7, 109.9, 106.3, 47.4, 25.2; HRMS (ESI+):

Calcd for  $C_{14}H_{15}O_1 [M+H]^+$ : 199.1123, Found: 199.1122. Specific Rotation:  $[\alpha]_D^{20}$   $\square$  26.8 (*c* 1.19,  $CHCl_3$ ) for an enantiomerically enriched sample of 99:1 er.

Enantiomeric purity is determined by HPLC analysis of the derived primary alcohol (obtained from hydroboration of the terminal olefin with 9-BBN, followed by oxidation with  $NaBO_3 \cdot 4H_2O$ ) in comparison with authentic racemic material (98.6:1.4 er shown; Chiralcel AD-H column, 97/3 hexanes/*i*-PrOH, 0.5 mL/min, 220 nm).

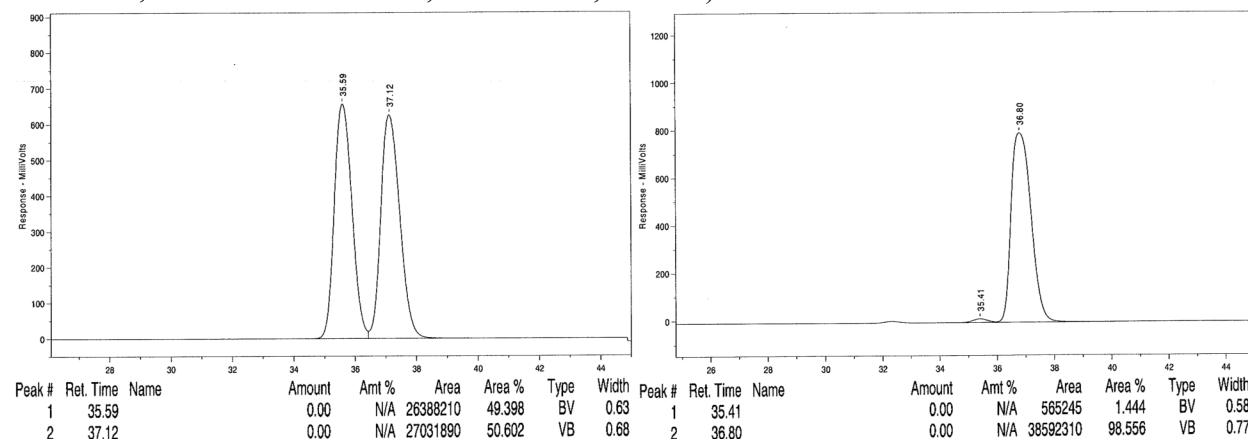

| Peak # | Time (mins) | Area (%) | Peak # | Time (mins) | Area (%) |
|--------|-------------|----------|--------|-------------|----------|
| 1      | 35.59       | 49.4     | 1      | 35.41       | 1.4      |
| 2      | 37.12       | 50.6     | 2      | 36.80       | 98.6     |

**(S)-2-(2-(2-Bromophenyl)but-3-en-2-yl)furan (Entry 2, Table 3).** IR (neat): 3059 (w), 2979 (w), 2939 (w), 1465 (w), 1427 (w), 1408 (w), 1368 (w), 1017 (m), 1009 (m), 922 (m), 799 (w), 751 (s), 723 (s)  $cm^{-1}$ ;  $^1H$  NMR (400 MHz,  $CDCl_3$ ):  $\delta$  7.55 (1H, dd,  $J = 7.6, 0.8$  Hz), 7.34  $\square$  7.24 (3H, m), 7.09 (1H, td,  $J = 7.6, 1.6$  Hz), 6.45 (1H, dd,  $J = 17.2, 10.4$  Hz), 6.33 (1H, dd,  $J = 3.2, 2.0$  Hz), 6.05 (1H, d,  $J = 3.2$  Hz), 5.20 (1H, d,  $J = 10.4$  Hz), 4.97 (1H, d,  $J = 17.2$  Hz), 1.88 (3H, s);  $^{13}C$  NMR (100 MHz,  $CDCl_3$ ):  $\delta$  158.9, 144.0, 142.9, 141.0, 135.4, 129.8, 128.4, 127.2, 123.7, 113.7, 110.5, 106.3, 48.6, 24.3; HRMS (ESI+): Calcd for  $C_{14}H_{14}BrO_1 [M+H]^+$ : 277.0228, Found: 277.0217. Specific Rotation:  $[\alpha]_D^{20}$   $\square$  39.8 (*c* 1.73,  $CHCl_3$ ) for an enantiomerically enriched sample of 99.5:0.5 er.

Enantiomeric purity is determined by HPLC analysis of the derived primary alcohol (obtained from hydroboration of the terminal olefin with 9-BBN, followed by oxidation with  $NaBO_3 \cdot 4H_2O$ ) in comparison with authentic racemic material (99.7:0.3 er shown; Chiralcel OJ-H column, 95/5 hexanes/*i*-PrOH, 0.5 mL/min, 220 nm).

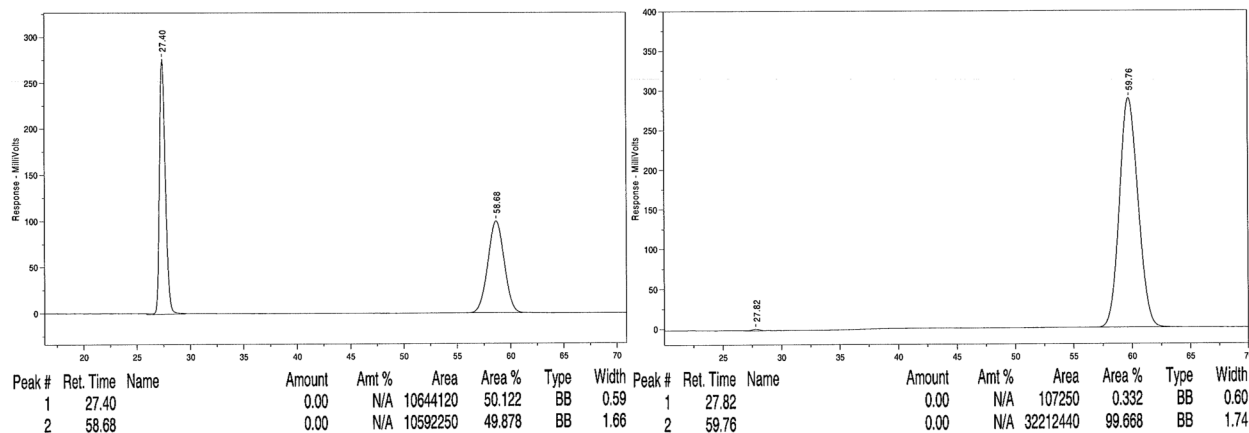

| Peak # | Time (mins) | Area (%) | Peak # | Time (mins) | Area (%) |
|--------|-------------|----------|--------|-------------|----------|
| 1      | 27.40       | 50.1     | 1      | 27.82       | 0.3      |
| 2      | 58.68       | 49.9     | 2      | 59.76       | 99.7     |

**(S)-2-(2-(2-Methoxyphenyl)but-3-en-2-yl)furan (Entry 3, Table 3).** IR (neat): 3081 (w), 2978 (w), 2936 (w), 2834 (w), 1598 (w), 1581 (w), 1488 (m), 1460 (m), 1434 (m), 1242 (s), 1027 (m), 1007 (m), 883 (m), 751 (s), 726 (s)  $\text{cm}^{-1}$ ;  $^1\text{H}$  NMR (400 MHz,  $\text{CDCl}_3$ ):  $\delta$  7.31  $\square$  7.30 (1H, m), 7.26  $\square$  7.21 (1H, m), 7.05 (1H, dd,  $J = 7.6, 1.6$  Hz), 6.92  $\square$  6.86 (2H, m), 6.41 (1H, dd,  $J = 17.7, 10.8$  Hz), 6.32  $\square$  6.30 (1H, m), 6.02 (1H, dd,  $J = 3.2, 0.8$  Hz), 5.13 (1H, dt,  $J = 10.4, 0.4$  Hz), 4.93 (1H, dd,  $J = 17.2, 1.2$  Hz), 3.62 (3H, s), 1.81 (3H, s);  $^{13}\text{C}$  NMR (100 MHz,  $\text{CDCl}_3$ ):  $\delta$  160.5, 157.9, 143.5, 140.6, 134.0, 128.3, 128.1, 120.5, 112.5, 112.4, 110.0, 104.6, 55.5, 46.2, 23.7; HRMS (ESI+): Calcd for  $\text{C}_{15}\text{H}_{17}\text{O}_2$   $[\text{M}+\text{H}]^+$ : 229.1229, Found: 229.1227. Specific Rotation:  $[\alpha]_{\text{D}}^{20}$   $\square$  20.6 ( $c$  1.52,  $\text{CHCl}_3$ ) for an enantiomerically enriched sample of 99.5:0.5 er.

Enantiomeric purity is determined by HPLC analysis of the derived primary alcohol (obtained from hydroboration of the terminal olefin with 9-BBN, followed by oxidation with  $\text{NaBO}_3 \cdot 4\text{H}_2\text{O}$ ) in comparison with authentic racemic material (99.6:0.4 er shown; Chiralcel OJ-H column, 96/4 hexanes/*i*-PrOH, 0.5 mL/min, 220 nm).

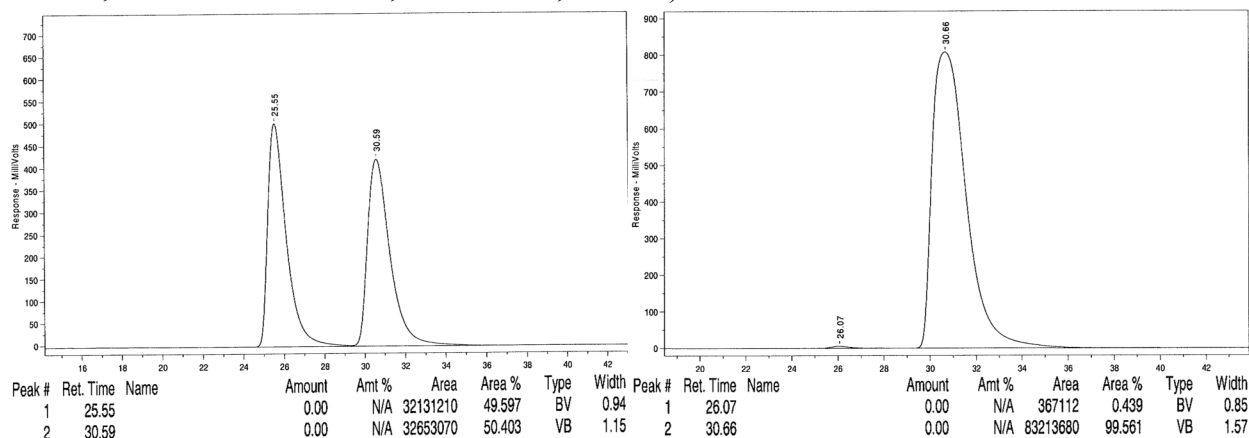

| Peak # | Time (mins) | Area (%) | Peak # | Time (mins) | Area (%) |
|--------|-------------|----------|--------|-------------|----------|
| 1      | 25.55       | 49.6     | 1      | 26.07       | 0.4      |
| 2      | 30.59       | 50.4     | 2      | 30.66       | 99.6     |

**(S)-2-(2-*o*-Tolylbut-3-en-2-yl)furan (Entry 4, Table 3).** IR (neat): 3059 (w), 3015 (w), 2978 (w), 2933 (w), 2876 (w), 1499 (w), 1486 (w), 1456 (w), 1153 (w), 1008 (m), 922 (m), 750 (m), 724 (s)  $\text{cm}^{-1}$ ;  $^1\text{H}$  NMR (400 MHz,  $\text{CDCl}_3$ ):  $\delta$  7.34–7.33 (1H, m), 7.31–7.28 (1H, m), 7.20–7.16 (2H, m), 7.16–7.10 (1H, m), 6.48 (1H, dd,  $J = 17.2, 10.4$  Hz), 6.33 (1H, dd,  $J = 3.2, 1.6$  Hz), 6.05 (1H, dd,  $J = 2.8, 0.8$  Hz), 5.16 (1H, dd,  $J = 10.4, 0.8$  Hz), 4.92 (1H, dd,  $J = 17.2, 1.2$  Hz), 1.99 (3H, s), 1.79 (3H, s);  $^{13}\text{C}$  NMR (100 MHz,  $\text{CDCl}_3$ ):  $\delta$  160.4, 143.6, 143.1, 141.0, 137.3, 132.3, 127.6, 126.9, 125.8, 113.0, 110.2, 105.1, 47.5, 25.8, 21.0; HRMS (ESI+): Calcd for  $\text{C}_{15}\text{H}_{17}\text{O}_1$   $[\text{M}+\text{H}]^+$ : 213.1279, Found: 213.1273. Specific Rotation:  $[\alpha]_{\text{D}}^{20}$  –21.1 ( $c$  1.92,  $\text{CHCl}_3$ ) for an enantiomerically enriched sample of 98:2 er.

Enantiomeric purity is determined by HPLC analysis of the derived primary alcohol (obtained from hydroboration of the terminal olefin with 9-BBN, followed by oxidation with  $\text{NaBO}_3 \cdot 4\text{H}_2\text{O}$ ) in comparison with authentic racemic material (98.3:1.7 er shown; Chiralpak AD-H column, 95/5 hexanes/*i*-PrOH, 0.5 mL/min, 220 nm).

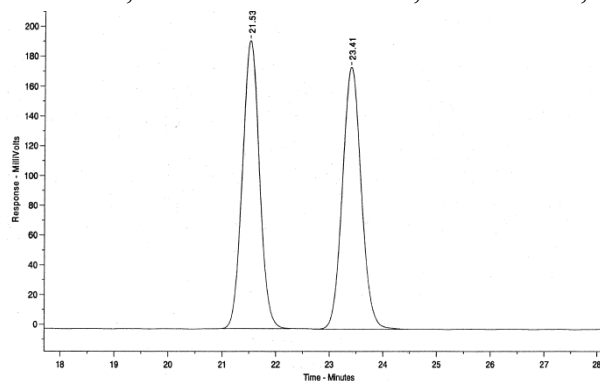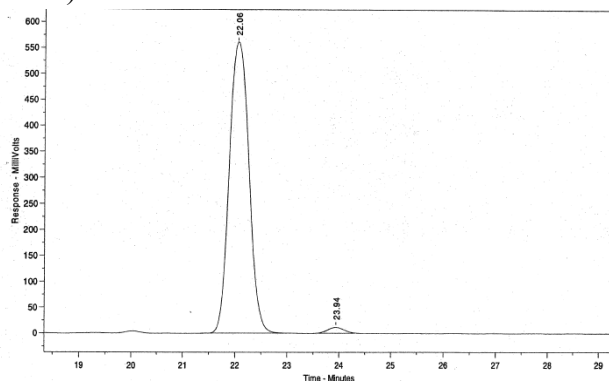

| Peak # | Time (mins) | Area (%) | Peak # | Time (mins) | Area (%) |
|--------|-------------|----------|--------|-------------|----------|
| 1      | 21.53       | 49.9     | 1      | 22.06       | 98.3     |
| 2      | 23.41       | 50.1     | 2      | 22.94       | 1.7      |

**(S)-2-(2-(4-Nitrophenyl)but-3-en-2-yl)furan (Entry 5, Table 3).** IR (neat): 1603 (w), 1514 (s), 1344 (s), 1316 (w), 1154 (w), 1110 (w), 1011 (m), 925 (m), 851 (m), 734 (m), 699 (m)  $\text{cm}^{-1}$ ;  $^1\text{H}$  NMR (400 MHz,  $\text{CDCl}_3$ ):  $\delta$  8.15–8.11 (2H, m), 7.38–7.37 (1H, m), 7.33–7.30 (2H, m), 6.36–6.35 (1H, m), 6.32 (1H, dd,  $J = 17.6, 10.8$  Hz), 6.18 (1H, dd,  $J = 3.2, 0.8$  Hz), 5.29 (1H, dd,  $J = 10.4, 0.8$  Hz), 5.03 (1H, dd,  $J = 17.6, 0.8$  Hz), 1.77 (3H, s);  $^{13}\text{C}$  NMR (100 MHz,  $\text{CDCl}_3$ ):  $\delta$  158.0, 153.3, 146.6, 142.2, 142.1, 128.1, 123.5, 115.0, 110.2, 106.8, 47.6, 25.3; HRMS (ESI+):

Calcd for  $C_{14}H_{14}N_1O_3 [M+H]^+$ : 244.0974, Found: 244.0985. Specific Rotation:  $[\alpha]_D^{20}$   $\square$ 21.1 ( $c$  1.92,  $CHCl_3$ ) for an enantiomerically enriched sample of 98.5:1.5 er.

Enantiomeric purity is determined by HPLC analysis of the derived primary alcohol (obtained from hydroboration of the terminal olefin with 9-BBN, followed by oxidation with  $NaBO_3 \cdot 4H_2O$ ) in comparison with authentic racemic material (98.6:1.4 er shown; Chiralpak AD-H column, 93/7 hexanes/*i*-PrOH, 0.5 mL/min, 220 nm).

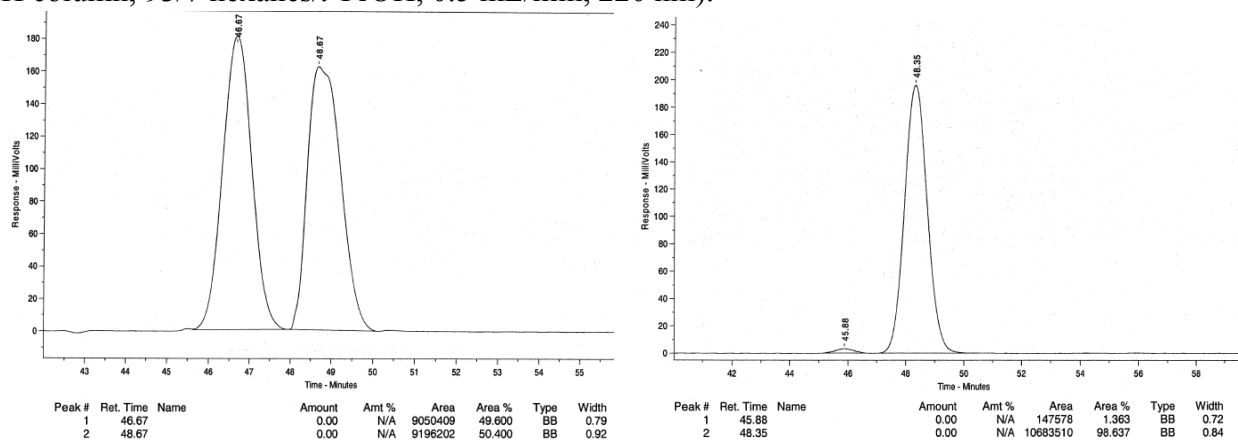

| Peak # | Time (mins) | Area (%) | Peak # | Time (mins) | Area (%) |
|--------|-------------|----------|--------|-------------|----------|
| 1      | 46.67       | 49.6     | 1      | 45.88       | 1.4      |
| 2      | 48.67       | 50.4     | 2      | 48.35       | 98.6     |

**(R)-(2-(Furan-2-yl)but-3-en-2-yl)dimethyl(phenyl)silane (Entry 6, Table 3).** IR (neat): 3079 (w), 3050 (w), 3010 (w), 2959 (w), 2929 (w), 1624 (w), 1500 (w), 1192 (m), 1160 (w), 1015 (w), 923 (w), 901 (w), 833 (m), 816 (s), 772 (m), 723 (s), 699 (s), 654 (m)  $cm^{-1}$ ;  $^1H$  NMR (400 MHz,  $CDCl_3$ ):  $\delta$  7.37  $\square$  7.27 (6H, m), 6.28  $\square$  6.27 (1H, m), 6.26 (1H, dd,  $J = 17.6, 10.8$  Hz), 5.77  $\square$  5.76 (1H, m), 5.03 (1H, dd,  $J = 10.8, 1.6$  Hz), 4.84 (1H, dd,  $J = 17.6, 1.2$  Hz), 1.35 (3H, s), 0.36 (3H, s), 0.30 (3H, s);  $^{13}C$  NMR (100 MHz,  $CDCl_3$ ):  $\delta$  159.9, 140.6, 140.4, 136.3, 134.6, 129.2, 127.3, 111.2, 110.3, 103.4, 35.8, 17.7,  $\square$ 4.9,  $\square$ 5.0; HRMS (ESI+): Calcd for  $C_{16}H_{21}O_1Si_1 [M+H]^+$ : 257.1362, Found: 257.1366. Specific Rotation:  $[\alpha]_D^{20}$   $\square$ 4.00 ( $c$  1.37,  $CHCl_3$ ) for an enantiomerically enriched sample of 85:15 er.

Enantiomeric purity is determined by HPLC analysis of the derived primary alcohol (obtained from hydroboration of the terminal olefin with 9-BBN, followed by oxidation with  $H_2O_2$ ) in comparison with authentic racemic material (86.8:13.2 er shown; Chiralcel OJ-H column, 95/5 hexanes/*i*-PrOH, 0.5 mL/min, 220 nm).

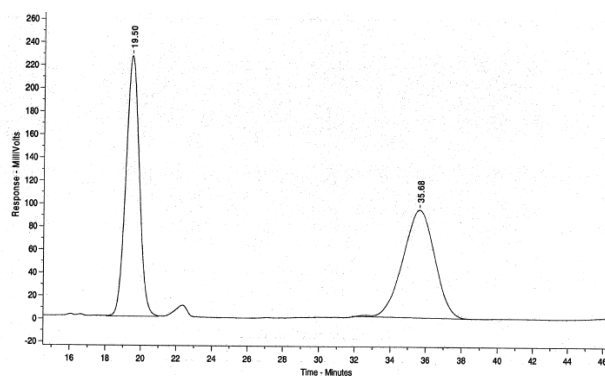

| Peak # | Ret. Time | Name | Amount | Amt % | Area     | Area % | Type | Width |
|--------|-----------|------|--------|-------|----------|--------|------|-------|
| 1      | 19.50     |      | 0.00   | N/A   | 11894210 | 50.426 | BB   | 0.81  |
| 2      | 35.68     |      | 0.00   | N/A   | 11693120 | 49.574 | BB   | 1.95  |

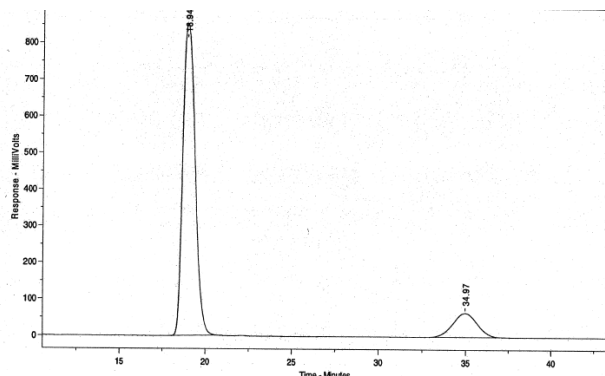

| Peak # | Ret. Time | Name | Amount | Amt % | Area     | Area % | Type | Width |
|--------|-----------|------|--------|-------|----------|--------|------|-------|
| 1      | 18.94     |      | 0.00   | N/A   | 42114900 | 86.830 | BB   | 0.78  |
| 2      | 34.97     |      | 0.00   | N/A   | 6387777  | 13.170 | BB   | 1.54  |

| Peak # | Time (mins) | Area (%) | Peak # | Time (mins) | Area (%) |
|--------|-------------|----------|--------|-------------|----------|
| 1      | 19.50       | 50.4     | 1      | 18.94       | 86.8     |
| 2      | 35.68       | 49.6     | 2      | 34.97       | 13.2     |

**(S)-3-(2-Phenylbut-3-en-2-yl)furan (Entry 7, Table 3).** IR (neat): 2976 (w), 1636 (w), 1599 (w), 1492 (w), 1445 (w), 1409 (w), 1368 (w), 1160 (w), 1060 (w), 1025 (m), 1000 (w), 954 (w), 918 (m), 873 (m), 785 (m), 758 (m), 728 (w), 698 (s), 599 (s), 553 (w), 532 (w)  $\text{cm}^{-1}$ ;  $^1\text{H}$  NMR (400 MHz,  $\text{CDCl}_3$ ):  $\delta$  7.39–7.38 (1H, m), 7.30–7.28 (4H, m), 7.23–7.19 (1H, m), 7.16–7.15 (1H, m), 6.26 (1H, dd,  $J = 17.6, 10.8$  Hz), 6.19–6.18 (1H, m), 5.16 (1H, dd,  $J = 10.8, 1.2$  Hz), 4.98 (1H, dd,  $J = 17.2, 1.2$  Hz), 1.70 (3H, s);  $^{13}\text{C}$  NMR (100 MHz,  $\text{CDCl}_3$ ):  $\delta$  146.9, 145.6, 143.1, 139.5, 132.5, 128.2, 127.3, 126.4, 113.1, 110.7, 44.7, 27.2; HRMS (ESI<sup>+</sup>): Calcd for  $\text{C}_{14}\text{H}_{15}\text{O}_1$   $[\text{M}+\text{H}]^+$ : 199.1123, Found: 199.1120. Specific Rotation:  $[\alpha]_{\text{D}}^{20} -4.32$  ( $c$  0.47,  $\text{CHCl}_3$ ) for an enantiomerically enriched sample of 97:3 er.

Enantiomeric purity is determined by HPLC analysis of the derived primary alcohol (obtained from hydroboration of the terminal olefin with 9-BBN, followed by oxidation with  $\text{NaBO}_3 \cdot 4\text{H}_2\text{O}$ ) in comparison with authentic racemic material (97.1:2.9 er shown; Chiralcel OJ-H column, 99/1 hexanes/*i*-PrOH, 1.0 mL/min, 220 nm).

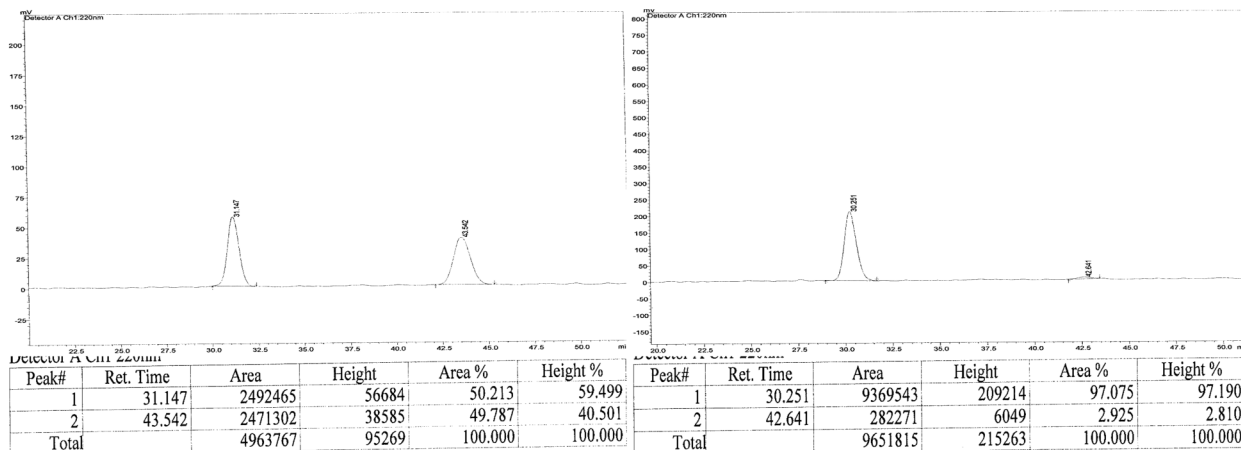

| Peak# | Ret. Time | Area    | Height | Area %  | Height % |
|-------|-----------|---------|--------|---------|----------|
| 1     | 31.147    | 2492465 | 56684  | 50.213  | 59.499   |
| 2     | 43.542    | 2471302 | 38585  | 49.787  | 40.501   |
| Total |           | 4963767 | 95269  | 100.000 | 100.000  |

| Peak# | Ret. Time | Area    | Height | Area %  | Height % |
|-------|-----------|---------|--------|---------|----------|
| 1     | 30.251    | 9369543 | 209214 | 97.075  | 97.190   |
| 2     | 42.641    | 282271  | 6049   | 2.925   | 2.810    |
| Total |           | 9651815 | 215263 | 100.000 | 100.000  |



| Peak # | Time (mins) | Area (%) | Peak # | Time (mins) | Area (%) |
|--------|-------------|----------|--------|-------------|----------|
| 1      | 31.147      | 50.2     | 1      | 30.251      | 97.1     |
| 2      | 43.542      | 49.8     | 2      | 42.641      | 2.9      |

**(S)-2-(2-Phenylbut-3-en-2-yl)thiophene (Entry 8, Table 3).** IR (neat): 3084 (w), 3059 (w), 2976 (w), 2931 (w), 1634 (w), 1599 (w), 1491 (w), 1444 (w), 1407 (w), 1370 (w), 1237 (w), 999 (w), 918 (m), 853 (w), 828 (w), 759 (m), 692 (s), 527 (w)  $\text{cm}^{-1}$ ;  $^1\text{H}$  NMR (400 MHz,  $\text{CDCl}_3$ ):  $\delta$  7.30–7.25 (4H, m), 7.24–7.19 (2H, m), 6.95 (1H, dd,  $J = 5.2, 3.6$  Hz), 6.79 (1H, dd,  $J = 3.6, 1.2$  Hz), 6.38 (1H, dd,  $J = 17.2, 10.4$  Hz), 5.20 (1H, dd,  $J = 10.8, 1.2$  Hz), 4.96 (1H, dd,  $J = 17.2, 1.2$  Hz), 1.87 (3H, s);  $^{13}\text{C}$  NMR (100 MHz,  $\text{CDCl}_3$ ):  $\delta$  153.0, 147.5, 146.1, 128.2, 127.4, 126.6, 126.5, 125.0, 124.1, 113.5, 48.5, 28.8; HRMS (ESI+): Calcd for  $\text{C}_{14}\text{H}_{15}\text{S}_1$   $[\text{M}+\text{H}]^+$ : 215.0895, Found: 215.0892. Specific Rotation:  $[\alpha]_{\text{D}}^{20} -22.6$  ( $c$  0.31,  $\text{CHCl}_3$ ) for an enantiomerically enriched sample of 96:4 er.

Enantiomeric purity is determined by HPLC analysis in comparison with authentic racemic material (96.0:4.0 er shown; Chiralcel OD-H column, 100/0 hexanes/*i*-PrOH, 0.5 mL/min, 254 nm).

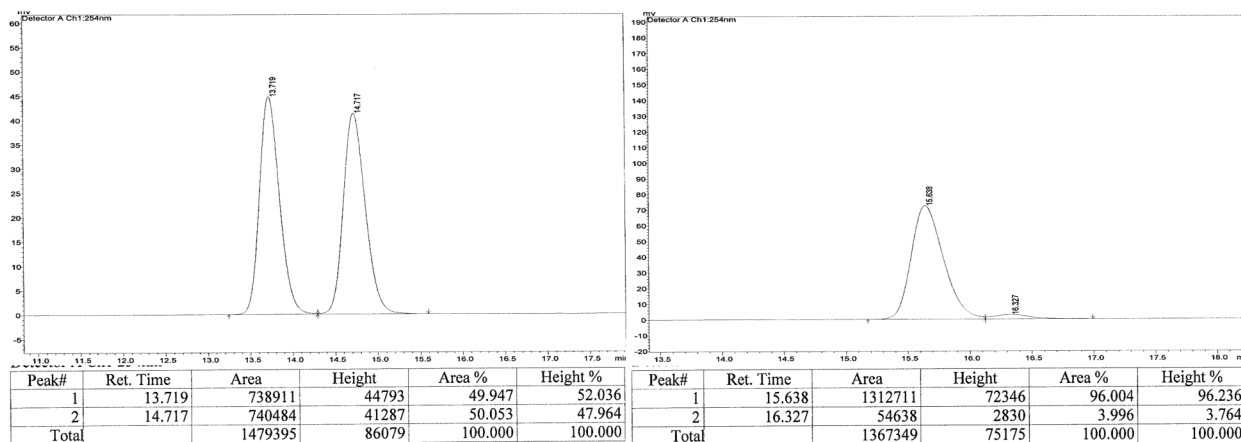

| Peak # | Time (mins) | Area (%) | Peak # | Time (mins) | Area (%) |
|--------|-------------|----------|--------|-------------|----------|
| 1      | 13.719      | 49.9     | 1      | 15.638      | 96.0     |
| 2      | 14.717      | 50.1     | 2      | 16.327      | 4.0      |

**(S)-2-(2-(2-Bromophenyl)but-3-en-2-yl)thiophene (Entry 9, Table 3).** IR (neat): 3064 (w), 2974 (w), 2933 (w), 1463 (w), 1430 (w), 1406 (w), 1368 (w), 1348 (w), 1018 (m), 910 (m), 852 (w), 824 (w), 805 (w), 753 (m), 732 (m), 689 (s), 644 (m)  $\text{cm}^{-1}$ ;  $^1\text{H}$  NMR (400 MHz,  $\text{CDCl}_3$ ):  $\delta$  7.57 (1H, dd,  $J = 7.6, 1.6$  Hz), 7.52 (1H, dd,  $J = 8.0, 1.6$  Hz), 7.30 (1H, td,  $J = 7.6, 1.2$  Hz), 7.19 (1H, dd,  $J = 4.4, 1.2$  Hz), 7.12 (1H, td,  $J = 7.6, 1.6$  Hz), 6.93 (1H, dd,  $J = 4.8, 3.2$  Hz), 6.67 (1H, dd,  $J = 3.6, 1.2$  Hz), 6.58 (1H, dd,  $J = 17.6, 10.8$  Hz), 5.20 (1H, dd,  $J = 10.4, 0.4$  Hz), 4.97 (1H,

dd,  $J = 17.2, 0.4$  Hz), 1.99 (3H, s);  $^{13}\text{C}$  NMR (100 MHz,  $\text{CDCl}_3$ ):  $\delta$  152.5, 145.4, 145.1, 135.7, 129.6, 128.5, 127.1, 126.7, 124.5, 124.4, 123.4, 113.4, 49.5, 27.9; HRMS (ESI+): Calcd for  $\text{C}_{14}\text{H}_{14}\text{Br}_1\text{S}_1$   $[\text{M}+\text{H}]^+$ : 293.0000, Found: 293.0006. Specific Rotation:  $[\alpha]_{\text{D}}^{20} \square 26.0$  ( $c$  2.93,  $\text{CHCl}_3$ ) for an enantiomerically enriched sample of 98:2 er.

Enantiomeric purity is determined by HPLC analysis of the derived primary alcohol (obtained from hydroboration of the terminal olefin with 9-BBN, followed by oxidation with  $\text{NaBO}_3 \cdot 4\text{H}_2\text{O}$ ) in comparison with authentic racemic material (98.4:1.6 er shown; Chiralcel OJ-H column, 94/6 hexanes/*i*-PrOH, 0.5 mL/min, 220 nm).

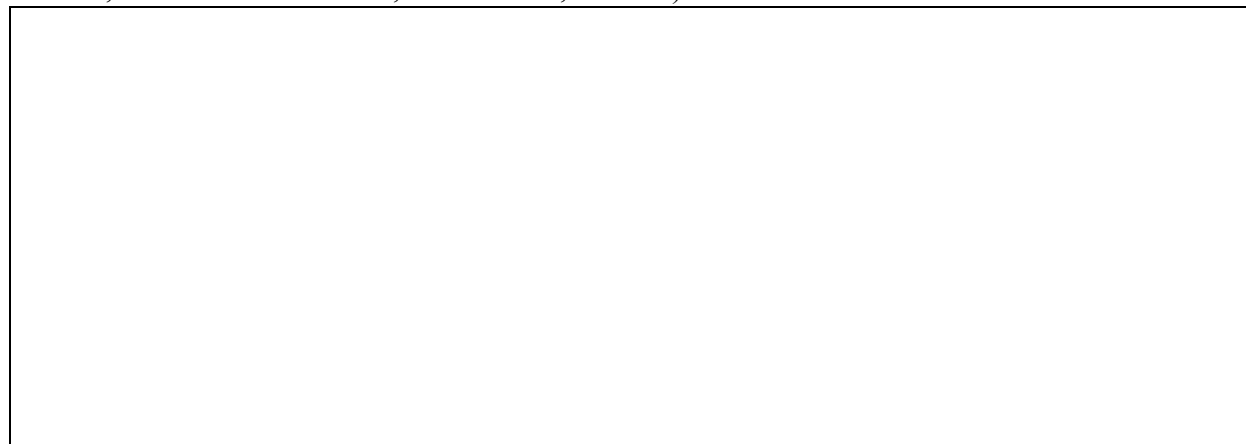

| Peak # | Time (mins) | Area (%) | Peak # | Time (mins) | Area (%) |
|--------|-------------|----------|--------|-------------|----------|
| 1      | 27.08       | 49.5     | 1      | 27.57       | 1.6      |
| 2      | 44.04       | 50.5     | 2      | 45.09       | 98.4     |

**(S)-2-(2-(4-Nitrophenyl)but-3-en-2-yl)thiophene (Entry 10, Table 3).** IR (neat): 3081 (w), 2977 (w), 2935 (w), 1602 (w), 1513 (s), 1342 (s), 1238 (w), 1012 (w), 924 (w), 849 (m), 830 (w), 804 (w), 694 (s)  $\text{cm}^{-1}$ ;  $^1\text{H}$  NMR (400 MHz,  $\text{CDCl}_3$ ):  $\delta$  8.14  $\square$  8.11 (2H, m), 7.43  $\square$  7.41 (2H, m), 7.25  $\square$  7.22 (1H, m), 6.98  $\square$  6.96 (1H, m), 6.81  $\square$  6.78 (1H, m), 6.35 (1H, ddd,  $J = 17.2, 10.4, 0.8$  Hz), 5.27 (1H, dd,  $J = 10.4, 0.4$  Hz), 4.98 (1H, d,  $J = 17.2$  Hz), 1.89 (3H, s);  $^{13}\text{C}$  NMR (100 MHz,  $\text{CDCl}_3$ ):  $\delta$  154.9, 151.1, 146.6, 144.7, 128.4, 126.7, 125.3, 124.7, 123.3, 114.7, 48.7, 28.6; HRMS (ESI+): Calcd for  $\text{C}_{14}\text{H}_{14}\text{N}_1\text{O}_2\text{S}_1$   $[\text{M}+\text{H}]^+$ : 260.0745, Found: 260.0754. Specific Rotation:  $[\alpha]_{\text{D}}^{20} \square 2.70$  ( $c$  2.38,  $\text{CHCl}_3$ ) for an enantiomerically enriched sample of 94:6 er.

Enantiomeric purity is determined by HPLC analysis of the derived primary alcohol (obtained from hydroboration of the terminal olefin with 9-BBN, followed by oxidation with  $\text{NaBO}_3 \cdot 4\text{H}_2\text{O}$ ) in comparison with authentic racemic material (93.8:6.2 er shown; Chiralcel OD column, 96/4 hexanes/*i*-PrOH, 1.0 mL/min, 220 nm).

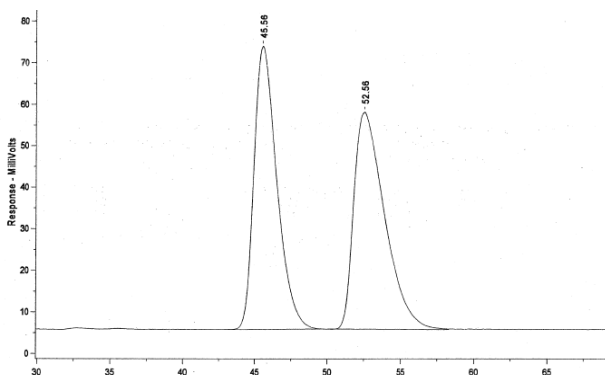

| Peak # | Ret. Time | Name | Amount | Amt % | Area    | Area % | Type | Width |
|--------|-----------|------|--------|-------|---------|--------|------|-------|
| 1      | 45.56     |      | 0.00   | N/A   | 7555465 | 49.969 | BB   | 1.69  |
| 2      | 52.56     |      | 0.00   | N/A   | 7564971 | 50.031 | BB   | 2.22  |

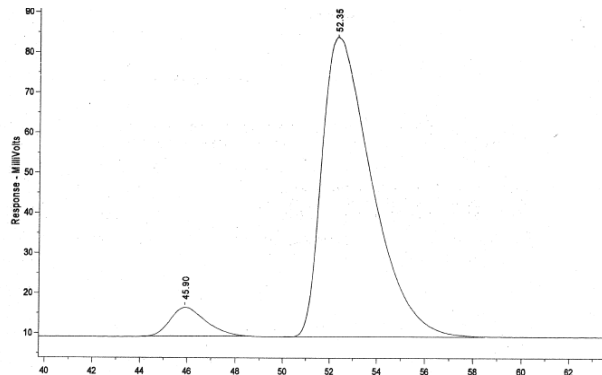

| Peak # | Ret. Time | Name | Amount | Amt % | Area     | Area % | Type | Width |
|--------|-----------|------|--------|-------|----------|--------|------|-------|
| 1      | 45.90     |      | 0.00   | N/A   | 731376   | 6.250  | BB   | 1.61  |
| 2      | 52.35     |      | 0.00   | N/A   | 10970270 | 93.750 | BB   | 2.26  |

| Peak # | Time (mins) | Area (%) | Peak # | Time (mins) | Area (%) |
|--------|-------------|----------|--------|-------------|----------|
| 1      | 45.56       | 50.0     | 1      | 45.90       | 6.2      |
| 2      | 52.56       | 50.0     | 2      | 52.35       | 93.8     |

**(S)-tert-Butyl 2-methyl-2-(thiophen-2-yl)but-3-enoate (Entry 11, Table 3).** IR (neat): 2978 (w), 2935 (w), 1724 (s), 1455 (w), 1432 (w), 1419 (w), 1367 (m), 1253 (s), 1237 (m), 1154 (s), 1113 (s), 920 (m), 877 (m), 693 (s)  $\text{cm}^{-1}$ ;  $^1\text{H}$  NMR (400 MHz,  $\text{CDCl}_3$ ):  $\delta$  7.20–7.18 (1H, m), 6.95–6.92 (2H, m), 6.38 (1H, dd,  $J = 17.2, 10.4$  Hz), 5.20 (1H, dd,  $J = 11.2, 0.8$  Hz), 5.15 (1H, d,  $J = 17.2$  Hz), 1.70 (3H, s), 1.42 (9H, s);  $^{13}\text{C}$  NMR (100 MHz,  $\text{CDCl}_3$ ):  $\delta$  172.5, 147.6, 141.5, 126.4, 124.4, 124.3, 114.1, 81.6, 51.8, 27.9, 24.3; HRMS (ESI+): Calcd for  $\text{C}_{13}\text{H}_{19}\text{O}_2\text{S}_1$   $[\text{M}+\text{H}]^+$ : 239.1106, Found: 239.1105. Specific Rotation:  $[\alpha]_{\text{D}}^{20}$   $\square$  2.41 ( $c$  1.75,  $\text{CHCl}_3$ ) for an enantiomerically enriched sample of 79:21 er.

Enantiomeric purity is determined by HPLC analysis in comparison with authentic racemic material (87.7:12.3 er shown; Chiralcel OD column, 100% hexanes, 0.5 mL/min, 220 nm).

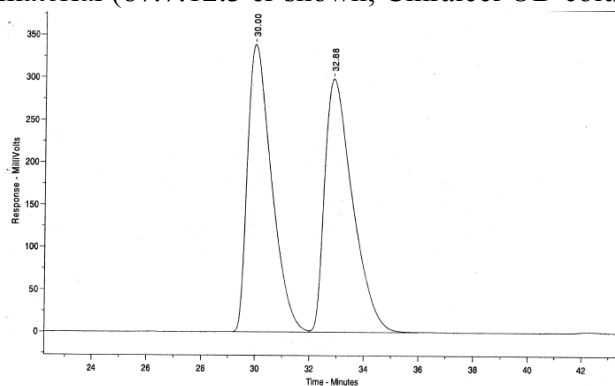

| Peak # | Ret. Time | Name | Amount | Amt % | Area     | Area % | Type | Width |
|--------|-----------|------|--------|-------|----------|--------|------|-------|
| 1      | 30.00     |      | 0.00   | N/A   | 21008610 | 49.677 | BV   | 0.97  |
| 2      | 32.88     |      | 0.00   | N/A   | 21281520 | 50.323 | VB   | 1.10  |

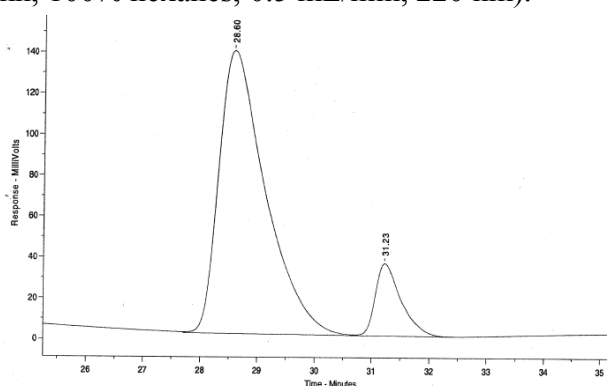

| Peak # | Ret. Time | Name | Amount | Amt % | Area    | Area % | Type | Width |
|--------|-----------|------|--------|-------|---------|--------|------|-------|
| 1      | 28.60     |      | 0.00   | N/A   | 7846838 | 87.739 | BB   | 0.85  |
| 2      | 31.23     |      | 0.00   | N/A   | 1096537 | 12.261 | BB   | 0.46  |

| Peak # | Time (mins) | Area (%) | Peak # | Time (mins) | Area (%) |
|--------|-------------|----------|--------|-------------|----------|
| 1      | 30.00       | 49.7     | 1      | 28.60       | 87.7     |
|        |             |          | 2      | 31.23       | 12.3     |

|   |       |      |   |       |      |
|---|-------|------|---|-------|------|
| 2 | 32.88 | 50.3 | 2 | 31.23 | 12.3 |
|---|-------|------|---|-------|------|

**(S)-3-(2-Phenylbut-3-en-2-yl)thiophene (Entry 12, Table 3).** IR (neat): 2974 (w), 1491 (w), 1444 (w), 1367 (w), 1000 (w), 918 (m), 838 (m), 755 (m), 698 (s), 664 (s), 528 (w)  $\text{cm}^{-1}$ ;  $^1\text{H}$  NMR (400 MHz,  $\text{CDCl}_3$ ):  $\delta$  7.31–7.18 (6H, m), 6.97–6.96 (1H, m), 6.85–6.83 (1H, m), 6.36 (1H, ddd,  $J = 17.2, 10.4, 0.8$  Hz), 5.17 (1H, dd,  $J = 10.8, 1.2$  Hz), 4.92 (1H, dd,  $J = 17.2, 1.2$  Hz), 1.79 (3H, s);  $^{13}\text{C}$  NMR (100 MHz,  $\text{CDCl}_3$ ):  $\delta$  149.0, 147.6, 146.0, 128.2, 127.5, 126.3, 125.3, 120.9, 113.1, 48.2, 27.5; HRMS (ESI+): Calcd for  $\text{C}_{14}\text{H}_{15}\text{S}_1$   $[\text{M}+\text{H}]^+$ : 215.0895, Found: 215.0899. Specific Rotation:  $[\alpha]_{\text{D}}^{20} -6.69$  ( $c$  0.28,  $\text{CHCl}_3$ ) for an enantiomerically enriched sample of 94:6 er.

Enantiomeric purity is determined by HPLC analysis of the derived primary alcohol (obtained from hydroboration of the terminal olefin with 9-BBN, followed by oxidation with  $\text{NaBO}_3 \cdot 4\text{H}_2\text{O}$ ) in comparison with authentic racemic material (94.0:6.0 er shown; Chiralcel OD-H column, 95/5 hexanes/*i*-PrOH, 1.0 mL/min, 220 nm).

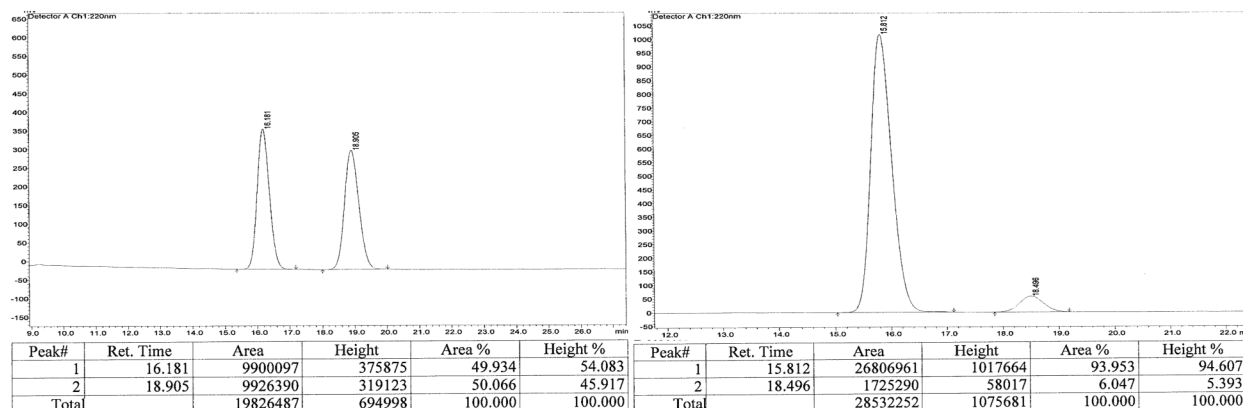

| Peak # | Time (mins) | Area (%) | Peak # | Time (mins) | Area (%) |
|--------|-------------|----------|--------|-------------|----------|
| 1      | 16.181      | 49.9     | 1      | 15.812      | 94.0     |
| 2      | 18.905      | 50.1     | 2      | 18.496      | 6.0      |

**(R)-3-(2-(2-Bromophenyl)but-3-en-2-yl)thiophene (Entry 13, Table 3).** IR (neat): 2974 (w), 1633 (w), 1464 (w), 1409 (w), 1367 (w), 1231 (w), 1198 (w), 1173 (w), 1084 (w), 1019 (m), 917 (m), 838 (m), 750 (s), 652 (m), 455 (w)  $\text{cm}^{-1}$ ;  $^1\text{H}$  NMR (400 MHz,  $\text{CDCl}_3$ ):  $\delta$  7.55 (1H, dd,  $J = 7.6, 1.6$  Hz), 7.51 (1H, dd,  $J = 8.0, 2.0$  Hz), 7.30 (1H, ddd,  $J = 8.0, 7.2, 1.6$  Hz), 7.23 (1H, dd,  $J = 5.2, 3.2$  Hz), 7.10 (1H, ddd,  $J = 7.6, 7.2, 1.6$  Hz), 6.90 (1H, dd,  $J = 3.2, 1.6$  Hz), 6.74 (1H, dd,  $J = 5.2, 1.2$  Hz), 6.56 (1H, dd,  $J = 17.6, 10.8$  Hz), 5.17 (1H, dd,  $J = 10.4, 0.8$  Hz), 4.94 (1H, dd,  $J = 17.2, 0.8$  Hz), 1.91 (3H, s);  $^{13}\text{C}$  NMR (100 MHz,  $\text{CDCl}_3$ ):  $\delta$  148.2, 145.7, 145.1, 135.7, 129.5, 128.3, 127.6, 127.2, 125.1, 124.2, 120.7, 113.1, 49.3, 26.6; HRMS (ESI+): Calcd for  $\text{C}_{14}\text{H}_{14}\text{Br}_1\text{S}_1$   $[\text{M}+\text{H}]^+$ : 293.0000, Found: 292.9987. Specific Rotation:  $[\alpha]_{\text{D}}^{20} -22.7$  ( $c$  1.19,  $\text{CHCl}_3$ ) for an enantiomerically enriched sample of 97:3 er.

Enantiomeric purity is determined by HPLC analysis of the derived primary alcohol (obtained from hydroboration of the terminal olefin with 9-BBN, followed by oxidation with  $\text{NaBO}_3 \cdot 4\text{H}_2\text{O}$ ) in comparison with authentic racemic material (97.0:3.0 er shown; Chiralcel OD-H column, 99/1 hexanes/*i*-PrOH, 1.0 mL/min, 220 nm).

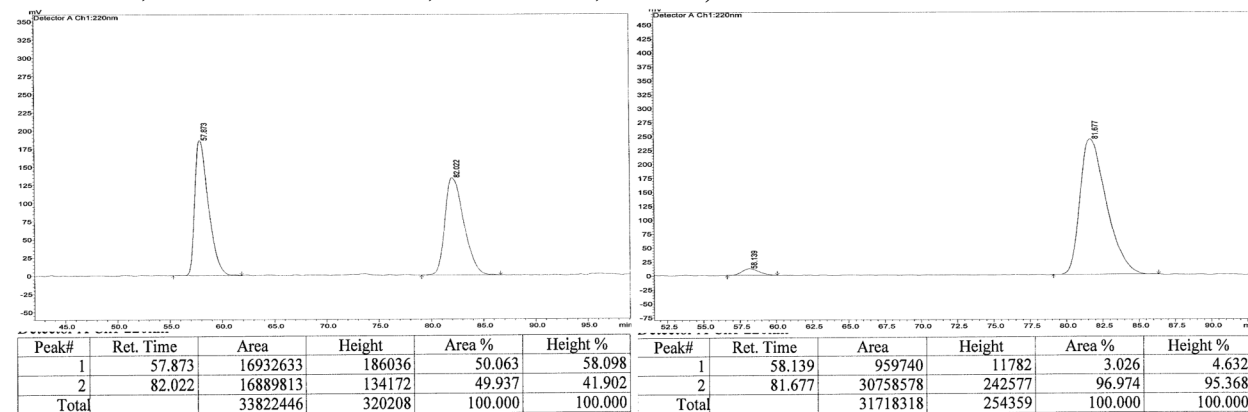

| Peak # | Time (mins) | Area (%) | Peak # | Time (mins) | Area (%) |
|--------|-------------|----------|--------|-------------|----------|
| 1      | 57.873      | 50.1     | 1      | 58.139      | 3.0      |
| 2      | 82.022      | 49.9     | 2      | 81.677      | 97.0     |

**(R)-Dimethyl(phenyl)(2-(thiophen-3-yl)but-3-en-2-yl)silane (Entry 14, Table 3).** IR (neat): 2959 (w), 1620 (w), 1427 (w), 1366 (w), 1247 (m), 1112 (m), 998 (w), 830 (s), 810 (s), 773 (s), 734 (s), 699 (s), 653 (s), 567 (m), 472 (m)  $\text{cm}^{-1}$ ;  $^1\text{H}$  NMR (400 MHz,  $\text{CDCl}_3$ ):  $\delta$  7.39–7.34 (1H, m), 7.31–7.25 (4H, m), 7.20 (1H, dd,  $J = 5.2, 2.8$  Hz), 6.80 (1H, dd,  $J = 5.2, 1.6$  Hz), 6.65 (1H, dd,  $J = 3.2, 1.6$  Hz), 6.36 (1H, dd,  $J = 17.2, 10.8$  Hz), 5.05 (1H, dd,  $J = 10.4, 1.2$  Hz), 4.90 (1H, dd,  $J = 17.6, 1.2$  Hz), 1.44 (3H, s), 0.26 (6H, d,  $J = 6.4$  Hz);  $^{13}\text{C}$  NMR (100 MHz,  $\text{CDCl}_3$ ):  $\delta$  146.5, 142.8, 136.5, 134.9, 129.3, 127.4, 127.2, 124.5, 117.9, 110.8, 36.7, 19.4, -5.2, -5.4; HRMS (ESI+): Calcd for  $\text{C}_{16}\text{H}_{21}\text{S}_1\text{Si}_1$   $[\text{M}+\text{H}]^+$ : 273.1133, Found: 273.1132. Specific Rotation:  $[\alpha]_D^{20} -18.7$  (c 0.41,  $\text{CHCl}_3$ ) for an enantiomerically enriched sample of 94:6 er.

Enantiomeric purity is determined by HPLC analysis in comparison with authentic racemic material (93.6:6.4 er shown; Chiralcel OD-H column, 100% hexanes, 0.2 mL/min, 220 nm).

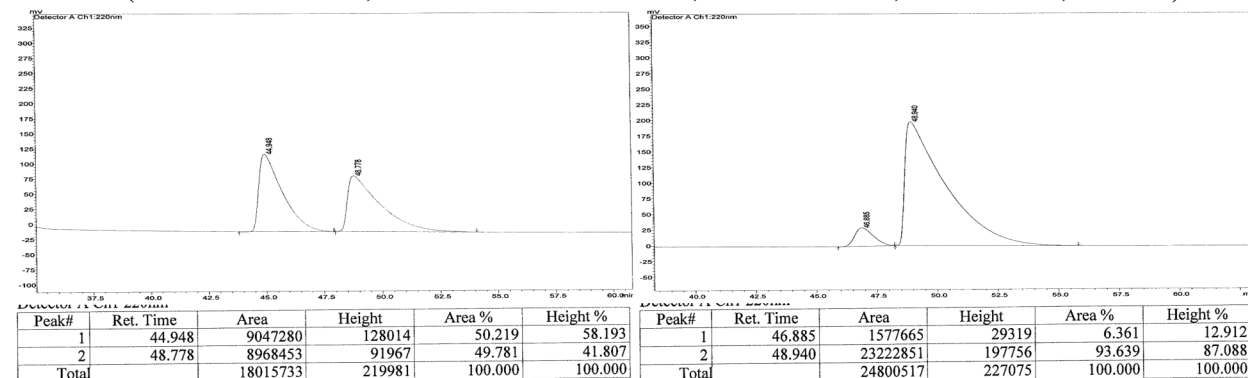

| Peak # | Time (mins) | Area (%) | Peak # | Time (mins) | Area (%) |
|--------|-------------|----------|--------|-------------|----------|
| 1      | 44.948      | 50.2     | 1      | 46.885      | 6.4      |
| 2      | 48.778      | 49.8     | 2      | 48.940      | 93.6     |

**(R)-1-(3,7-Dimethylocta-1,6-dien-3-yl)-4-methoxybenzene (sporochinol methyl ether, not shown in Scheme 3).** IR (neat): 2966 (m), 2927 (m), 2857 (w), 2835 (w), 1610 (w), 1511 (s), 1463 (w), 1295 (w), 1249 (s), 1182 (m), 1038 (m), 913 (w), 828 (m), 649 (w), 545 (w)  $\text{cm}^{-1}$ ;  $^1\text{H}$  NMR (400 MHz,  $\text{CDCl}_3$ ):  $\delta$  7.25–7.22 (2H, m), 6.87–6.83 (2H, m), 6.02 (1H, dd,  $J = 17.6, 10.8$  Hz), 5.11–5.07 (2H, m), 5.03 (1H, dd,  $J = 17.2, 1.2$  Hz), 3.80 (3H, s), 1.91–1.67 (4H, m), 1.66 (3H, s), 1.53 (3H, s), 1.36 (3H, s);  $^{13}\text{C}$  NMR (100 MHz,  $\text{CDCl}_3$ ):  $\delta$  157.7, 147.4, 139.7, 131.4, 127.7, 124.9, 113.5, 111.6, 55.4, 43.8, 41.3, 25.8, 25.2, 23.4, 17.7; HRMS (ESI+): Calcd for  $\text{C}_{17}\text{H}_{25}\text{O}_1$   $[\text{M}+\text{H}]^+$ : 245.1905, Found: 245.1905. Specific Rotation:  $[\alpha]_{\text{D}}^{20} -2.57$  ( $c$  0.79,  $\text{CHCl}_3$ ) for an enantiomerically enriched sample of 78.5:21.5 er.

Enantiomeric purity is determined by HPLC analysis of the derived primary alcohol (obtained from hydroboration of the terminal olefin with 9-BBN, followed by oxidation with  $\text{NaBO}_3 \cdot 4\text{H}_2\text{O}$ ) in comparison with authentic racemic material (78.7:21.3 er shown; Chiralcel OD-H column, 99/1 hexanes/*i*-PrOH, 1.0 mL/min, 220 nm).

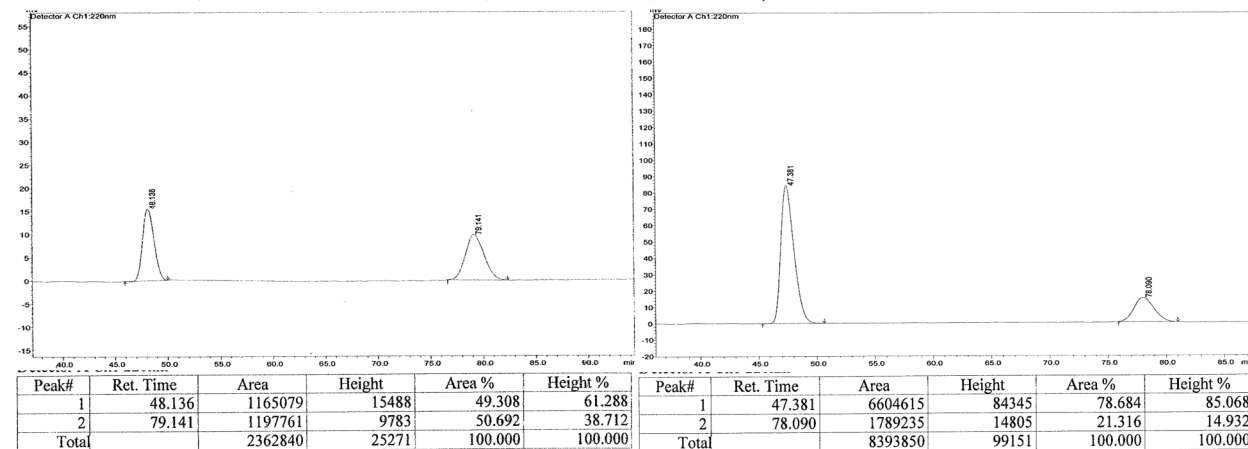

| Peak # | Time (mins) | Area (%) | Peak # | Time (mins) | Area (%) |
|--------|-------------|----------|--------|-------------|----------|
| 1      | 48.136      | 49.3     | 1      | 47.381      | 78.7     |
| 2      | 79.141      | 50.7     | 2      | 78.090      | 21.3     |

■ **Enantioselective Synthesis of R-(–)-sporochinol (Scheme 3): Procedure for Demethylation of Sporochinol Methyl Ether.** A flame-dried 6-dram vial is charged with sporochinol methyl ether (17.4 mg, 0.071 mmol) and a stir bar. The vial is sealed with a septum and purged with  $\text{N}_2$  flow for 10 minutes. Freshly prepared  $\text{MeMgI}$  in diethyl ether (890  $\mu\text{L}$ , 0.356 mmol) is added to the reaction vessel and solvent is carefully removed under reduced pressure. The resulting mixture is heated in a 180 °C oil bath for 10 minutes (white smoke generated as the reaction goes

on and disappears in 10 minutes), after which time, it is allowed to cool to 22 °C and diluted with Et<sub>2</sub>O (5 mL). A saturated solution of NH<sub>4</sub>Cl is added to quench the reaction and layers are separated. The aqueous layer is washed with Et<sub>2</sub>O (5 mL x 3) and the combined organic layers are dried with anhydrous MgSO<sub>4</sub>, filtered and concentrated *in vacuo* to afford a slightly yellow oil, which is subjected to silica gel chromatography (10:1 hexanes:ethyl acetate) to furnish the desired product as colorless oil (14.1 mg, 0.061 mmol, 86% yield). ***R*-(-)-Sporochinol**: The compound has been previously reported and spectra data match those previously described.<sup>9</sup> IR (neat): 3332 (br), 2966 (w), 2922 (w), 2857 (w), 1611 (w), 1511 (s), 1439 (w), 1374 (w), 1232 (m), 1178 (m), 1013 (w), 912 (m), 828 (s), 651 (w), 541 (w) cm<sup>-1</sup>; <sup>1</sup>H NMR (400 MHz, CDCl<sub>3</sub>): δ 7.20–7.17 (2H, m), 6.78–6.75 (2H, m), 6.00 (1H, dd, *J* = 17.6, 10.8 Hz), 5.10–5.00 (3H, m), 4.68 (1H, s), 1.86–1.61 (4H, m), 1.66 (3H, s), 1.52 (3H, s), 1.35 (3H, s); <sup>13</sup>C NMR (100 MHz, CDCl<sub>3</sub>): δ 153.5, 147.3, 139.9, 131.4, 130.0, 124.8, 114.9, 111.6, 43.8, 41.3, 25.8, 25.1, 23.4, 17.7; HRMS (ESI+): Calcd for C<sub>16</sub>H<sub>23</sub>O<sub>1</sub> [M+H]<sup>+</sup>: 231.1749, Found: 231.1751. Specific Rotation: [α]<sub>D</sub><sup>20</sup> -2.03 (*c* 0.82, CHCl<sub>3</sub>) for an enantiomerically enriched sample of 78.5:21.5 er.

**Proof of Stereochemistry:** Literature value ([α]<sub>D</sub><sup>20</sup> □ 2.5 (*c* 1.00, CHCl<sub>3</sub>), 98.5:1.5 er) is assigned to the (*R*) enantiomer.<sup>9</sup>

**(*R*)-2-(3,7-Dimethylocta-1,6-dien-3-yl)furan (11, Scheme 3).** IR (neat): 2970 (w), 2925 (w), 2857 (w), 1504 (w), 1452 (w), 1412 (w), 1376 (w), 1260 (w), 1156 (w), 1074 (w), 1012 (m), 916 (m), 799 (m), 730 (s), 598 (w) cm<sup>-1</sup>; <sup>1</sup>H NMR (400 MHz, CDCl<sub>3</sub>): δ 7.34–7.33 (1H, m), 6.29–6.27 (1H, m), 6.05–5.98 (2H, m), 5.10–5.04 (2H, m), 4.99 (1H, dd, *J* = 17.6, 1.2 Hz), 1.91–1.76 (2H, m), 1.67 (3H, d, *J* = 1.2 Hz), 1.55 (3H, d, *J* = 0.4 Hz), 1.37 (3H, s), 1.35–1.21 (2H, m); <sup>13</sup>C NMR (100 MHz, CDCl<sub>3</sub>): δ 160.6, 144.5, 141.2, 131.6, 124.5, 112.4, 109.9, 104.6, 42.3, 40.0, 25.8, 23.3, 22.8, 17.7; HRMS (ESI+): Calcd for C<sub>14</sub>H<sub>21</sub>O<sub>1</sub> [M+H]<sup>+</sup>: 205.1592, Found: 205.1596. Specific Rotation: [α]<sub>D</sub><sup>20</sup> -19.6 (*c* 2.43, CHCl<sub>3</sub>) for an enantiomerically enriched sample of 91:9 er.

Enantiomeric purity is determined by HPLC analysis of the derived primary alcohol (obtained from hydroboration of the terminal olefin with 9-BBN, followed by oxidation with NaBO<sub>3</sub>•4H<sub>2</sub>O) in comparison with authentic racemic material (91.1:8.9 er shown; Chiralcel OD-H column, 99/1 hexanes/*i*-PrOH, 1.0 mL/min, 220 nm).

[9] A. Fadel, L. Vandromme, *Tetrahedron: Asymmetry* **1999**, *10*, 1153–1162.

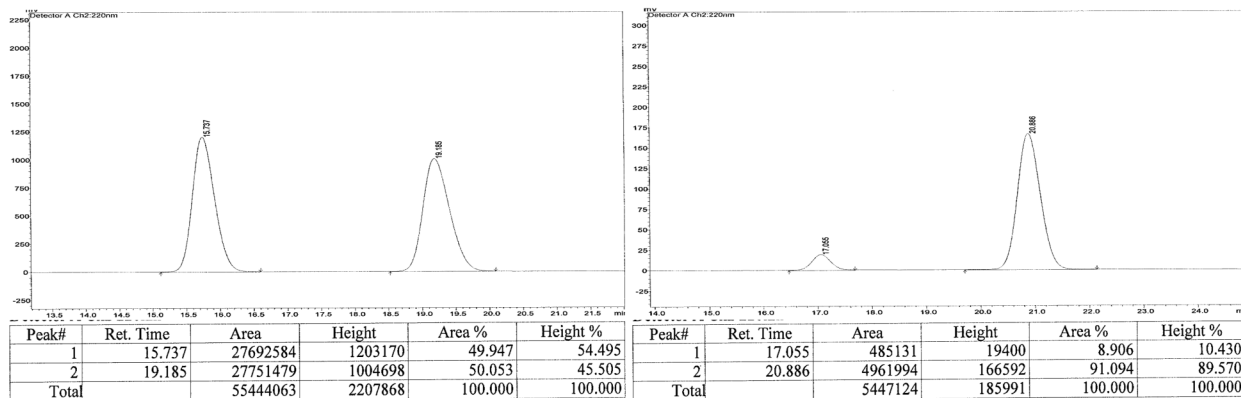

| Peak # | Time (mins) | Area (%) | Peak # | Time (mins) | Area (%) |
|--------|-------------|----------|--------|-------------|----------|
| 1      | 15.737      | 49.9     | 1      | 17.055      | 8.9      |
| 2      | 19.185      | 50.1     | 2      | 20.886      | 91.1     |

**(R)-2-(3,7-Dimethylocta-1,6-dien-3-yl)thiophene (12, Scheme 3).** IR (neat): 2967 (m), 2925 (m), 2856 (w), 1439 (w), 1375 (w), 1235 (w), 916 (w), 849 (w), 825 (w), 692 (s)  $\text{cm}^{-1}$ ;  $^1\text{H}$  NMR (400 MHz,  $\text{CDCl}_3$ ):  $\delta$  7.16 (1H, dd,  $J = 4.8, 0.8$  Hz), 6.94 (1H, dd,  $J = 5.2, 4.0$  Hz), 6.83 (1H, dd,  $J = 3.6, 1.2$  Hz), 6.08 (1H, dd,  $J = 17.6, 10.8$  Hz), 5.13–5.05 (3H, m), 1.96–1.88 (2H, m), 1.85–1.71 (2H, m), 1.68 (3H, s), 1.56 (3H, s), 1.47 (3H, s);  $^{13}\text{C}$  NMR (100 MHz,  $\text{CDCl}_3$ ):  $\delta$  153.7, 146.4, 131.7, 126.5, 124.4, 123.2, 123.0, 112.0, 43.5, 43.0, 25.9, 25.8, 23.5, 17.7; HRMS (ESI+): Calcd for  $\text{C}_{14}\text{H}_{21}\text{S}_1$   $[\text{M}+\text{H}]^+$ : 221.1364, Found: 221.1374. Specific Rotation:  $[\alpha]_{\text{D}}^{20} -9.44$  (c 0.35,  $\text{CHCl}_3$ ) for an enantiomerically enriched sample of 81:19 er.

Enantiomeric purity is determined by HPLC analysis in comparison with authentic racemic material (81.4:18.6 er shown; Chiralcel OJ-H column, 99/1 hexanes/*i*-PrOH, 0.5 mL/min, 220 nm).

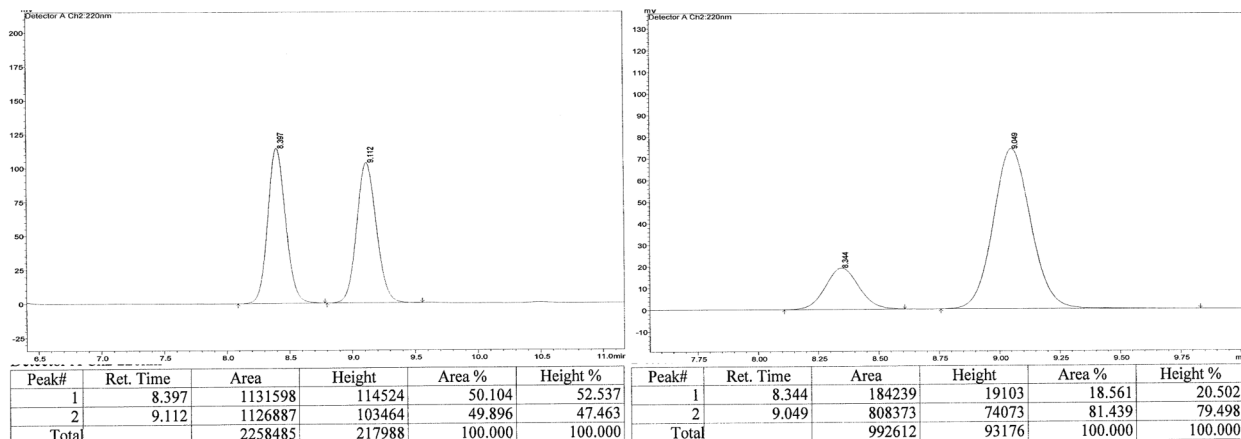

| Peak # | Time (mins) | Area (%) | Peak # | Time (mins) | Area (%) |
|--------|-------------|----------|--------|-------------|----------|
| 1      | 8.397       | 50.1     | 1      | 8.344       | 18.6     |



|   |       |      |   |       |      |
|---|-------|------|---|-------|------|
| 2 | 9.112 | 49.9 | 2 | 9.049 | 81.4 |
|---|-------|------|---|-------|------|

**(S)-2-(2-Cyclohexylbut-3-en-2-yl)furan (13, Scheme 3).** IR (neat): 2980 (w), 2926 (s), 2853 (m), 1635 (w), 1503 (w), 1450 (w), 1416 (w), 1370 (w), 1152 (w), 1014 (m), 914 (m), 802 (w), 731 (s), 598 (w)  $\text{cm}^{-1}$ ;  $^1\text{H}$  NMR (400 MHz,  $\text{CDCl}_3$ ):  $\delta$  7.34–7.33 (1H, m), 6.27–6.26 (1H, m), 6.11 (1H, dd,  $J = 17.6, 10.8$  Hz), 5.99–5.97 (1H, m), 5.08 (1H, dd,  $J = 10.8, 1.6$  Hz), 4.98 (1H, dd,  $J = 17.6, 1.2$  Hz), 1.78–1.59 (5H, m), 1.42–1.37 (1H, m), 1.30 (3H, s), 1.27–0.87 (5H, m);  $^{13}\text{C}$  NMR (100 MHz,  $\text{CDCl}_3$ ):  $\delta$  161.0, 143.4, 140.9, 112.9, 109.7, 104.9, 46.2, 45.6, 28.2, 27.9, 27.2, 27.1, 26.8, 18.4; HRMS (ESI+): Calcd for  $\text{C}_{14}\text{H}_{21}\text{O}_1$   $[\text{M}+\text{H}]^+$ : 205.1592, Found: 205.1595. Specific Rotation:  $[\alpha]_{\text{D}}^{20} -84.2$  ( $c$  1.37,  $\text{CHCl}_3$ ) for an enantiomerically enriched sample of 98:2 er.

Enantiomeric purity is determined by HPLC analysis of the derived primary alcohol (obtained from hydroboration of the terminal olefin with 9-BBN, followed by oxidation with  $\text{NaBO}_3 \cdot 4\text{H}_2\text{O}$ ) in comparison with authentic racemic material (98.1:1.9 er shown; Chiralcel OD-H column, 99/1 hexanes/*i*-PrOH, 1.0 mL/min, 220 nm).

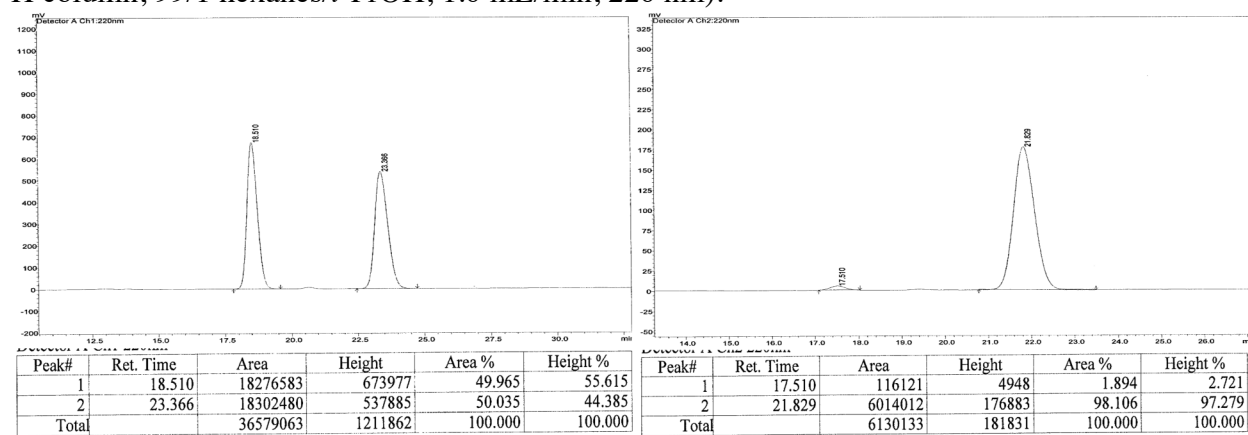

| Peak # | Time (mins) | Area (%) | Peak # | Time (mins) | Area (%) |
|--------|-------------|----------|--------|-------------|----------|
| 1      | 18.510      | 50.0     | 1      | 17.510      | 1.9      |
| 2      | 23.366      | 50.0     | 2      | 21.829      | 98.1     |

**(S)-2-(2-Cyclohexylbut-3-en-2-yl)thiophene (14, Scheme 3).** IR (neat): 2978 (w), 2923 (s), 2851 (m), 1449 (w), 1372 (w), 1235 (w), 1008 (w), 914 (w), 850 (w), 821 (w), 689 (s)  $\text{cm}^{-1}$ ;  $^1\text{H}$  NMR (400 MHz,  $\text{CDCl}_3$ ):  $\delta$  7.15 (1H, dd,  $J = 5.2, 0.8$  Hz), 6.93 (1H, dd,  $J = 5.2, 3.6$  Hz), 6.80 (1H, dd,  $J = 3.6, 1.2$  Hz), 6.14 (1H, dd,  $J = 17.6, 10.8$  Hz), 5.11 (1H, dd,  $J = 10.8, 1.2$  Hz), 5.05 (1H, dd,  $J = 17.2, 1.2$  Hz), 1.76–1.57 (6H, m), 1.42 (3H, s), 1.27–0.91 (5H, m);  $^{13}\text{C}$  NMR (100 MHz,  $\text{CDCl}_3$ ):  $\delta$  154.2, 145.3, 126.3, 123.0, 122.8, 112.6, 49.6, 46.8, 28.2, 28.0, 27.2, 27.1, 26.8, 21.5; HRMS (ESI+): Calcd for  $\text{C}_{14}\text{H}_{21}\text{S}_1$   $[\text{M}+\text{H}]^+$ : 221.1364, Found: 221.1367. Specific Rotation:  $[\alpha]_{\text{D}}^{20} -38.4$  ( $c$  0.34,  $\text{CHCl}_3$ ) for an enantiomerically enriched sample of 91.5:8.5 er.

Enantiomeric purity is determined by HPLC analysis in comparison with authentic racemic material (91.6:8.4 er shown; Chiralcel OJ-H column, 99/1 hexanes/*i*-PrOH, 0.5 mL/min, 220 nm).

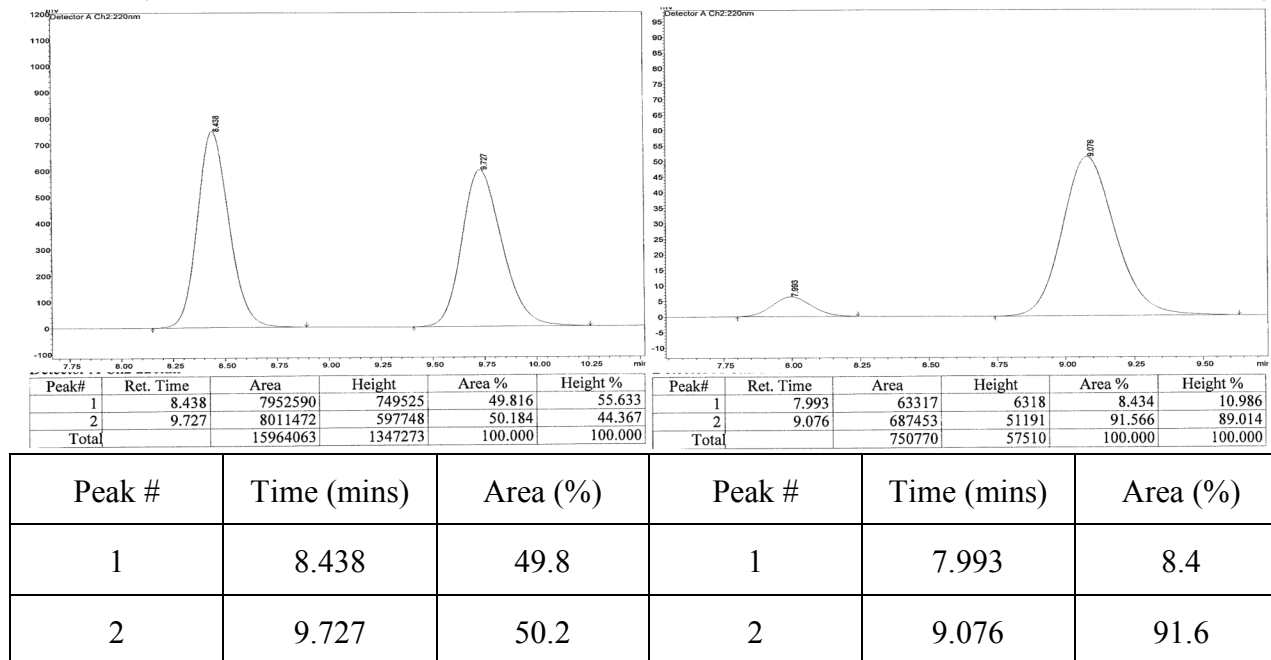

**(S)-3-(2-Cyclohexylbut-3-en-2-yl)furan (15, Scheme 3).** IR (neat): 2925 (s), 2853 (m), 1635 (w), 1501 (w), 1450 (w), 1413 (w), 1370 (w), 1159 (w), 1060 (w), 1027 (w), 914 (w), 873 (m), 778 (m), 726 (w), 600 (m)  $\text{cm}^{-1}$ ;  $^1\text{H}$  NMR (400 MHz,  $\text{CDCl}_3$ ):  $\delta$  7.35 (1H, dd,  $J = 1.6, 1.6$  Hz), 7.13 (1H, dd,  $J = 1.6, 0.8$  Hz), 6.30 (1H, dd,  $J = 0.8, 0.8$  Hz), 6.02 (1H, dd,  $J = 17.2, 10.8$  Hz), 5.04 (1H, dd,  $J = 10.8, 1.6$  Hz), 4.98 (1H, dd,  $J = 17.2, 1.6$  Hz), 1.74–1.56 (6H, m), 1.48–1.40 (1H, m), 1.25 (3H, s), 1.22–1.02 (2H, m), 0.98–0.86 (2H, m);  $^{13}\text{C}$  NMR (100 MHz,  $\text{CDCl}_3$ ):  $\delta$  145.2, 142.7, 138.8, 132.4, 112.3, 109.7, 47.3, 42.5, 28.00, 27.98, 27.21, 27.18, 26.8, 20.4; HRMS (ESI+): Calcd for  $\text{C}_{14}\text{H}_{21}\text{O}_1$   $[\text{M}+\text{H}]^+$ : 205.1592, Found: 205.1600. Specific Rotation:  $[\alpha]_D^{20} -9.48$  ( $c$  0.27,  $\text{CHCl}_3$ ) for an enantiomerically enriched sample of 95:5 er.

Enantiomeric purity is determined by HPLC analysis of the derived primary alcohol (obtained from hydroboration of the terminal olefin with 9-BBN, followed by oxidation with  $\text{NaBO}_3 \cdot 4\text{H}_2\text{O}$ ) in comparison with authentic racemic material (95.0:5.0 er shown; Chiralcel OD-H column, 99/1 hexanes/*i*-PrOH, 1.0 mL/min, 220 nm).

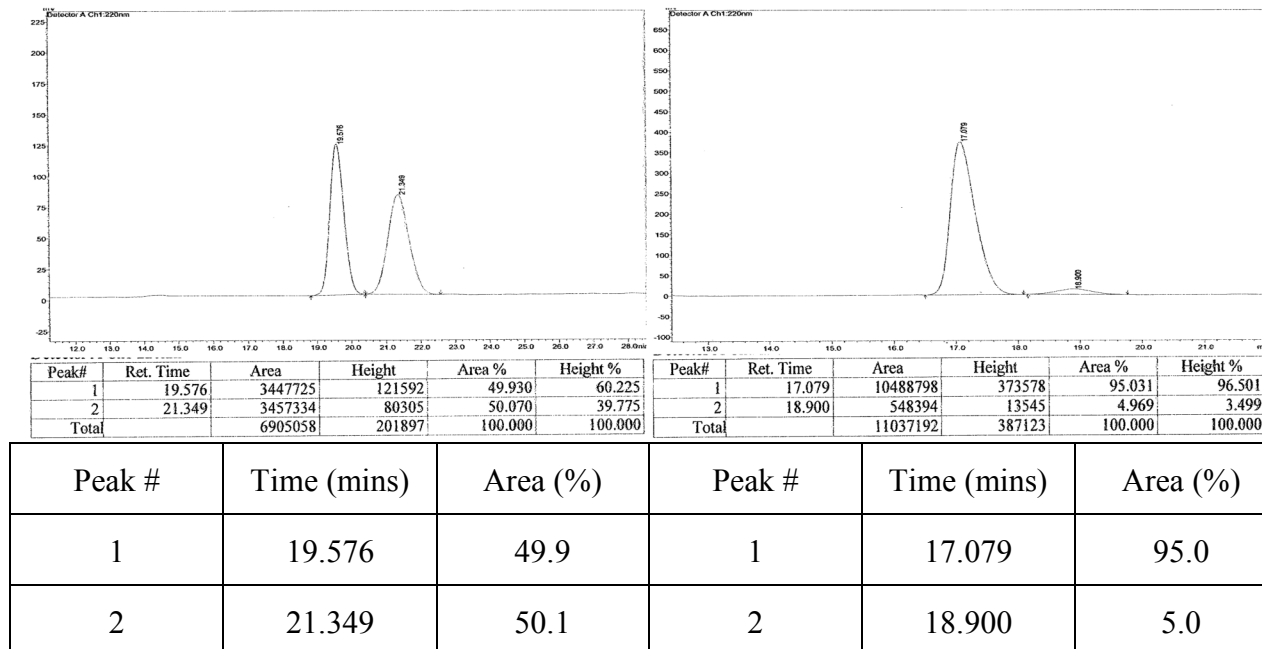

**(S)-3-(2-Cyclohexylbut-3-en-2-yl)thiophene (16, Scheme 3).** IR (neat): 2981 (w), 2926 (s), 2852 (m), 1449 (w), 913 (w), 770 (w), 652 (w)  $\text{cm}^{-1}$ ;  $^1\text{H}$  NMR (400 MHz,  $\text{CDCl}_3$ ):  $\delta$  7.25 (1H, ddd,  $J = 5.2, 3.2, 0.4$  Hz), 7.02 (1H, ddd,  $J = 5.2, 1.6, 0.4$  Hz), 6.91 (1H, ddd,  $J = 2.8, 1.2, 0.4$  Hz), 6.13 (1H, dd,  $J = 17.2, 10.8$  Hz), 5.08 (1H, ddd,  $J = 11.2, 1.6, 0.4$  Hz), 4.99 (1H, dd,  $J = 17.6, 1.2$  Hz), 1.75–1.58 (5H, m), 1.50–1.44 (1H, m), 1.34 (3H, s), 1.25–1.01 (3H, m), 0.99–0.86 (2H, m);  $^{13}\text{C}$  NMR (100 MHz,  $\text{CDCl}_3$ ):  $\delta$  149.6, 145.3, 126.8, 125.0, 119.5, 112.4, 47.8, 46.1, 28.2, 28.0, 27.3, 27.2, 26.8, 20.6; HRMS (ESI+): Calcd for  $\text{C}_{14}\text{H}_{21}\text{S}_1$   $[\text{M}+\text{H}]^+$ : 221.1364, Found: 221.1371. Specific Rotation:  $[\alpha]_D^{20} +1.39$  ( $c$  0.72,  $\text{CHCl}_3$ ) for an enantiomerically enriched sample of 92.5:7.5 er.

Enantiomeric purity is determined by HPLC analysis of the derived primary alcohol (obtained from hydroboration of the terminal olefin with 9-BBN, followed by oxidation with  $\text{NaBO}_3 \cdot 4\text{H}_2\text{O}$ ) in comparison with authentic racemic material (92.7:7.3 er shown; Chiralcel OD-H column, 99/1 hexanes/*i*-PrOH, 1.0 mL/min, 220 nm).

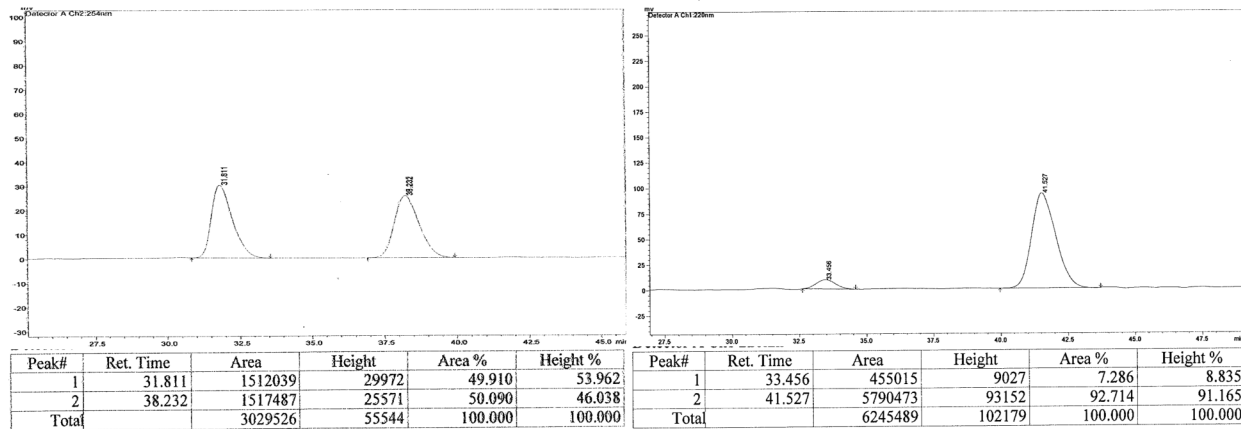

| Peak # | Time (mins) | Area (%) | Peak # | Time (mins) | Area (%) |
|--------|-------------|----------|--------|-------------|----------|
| 1      | 31.811      | 49.9     | 1      | 33.456      | 7.3      |
| 2      | 38.232      | 50.1     | 2      | 41.527      | 92.7     |

**(R)-2-(2-(Dimethyl(phenyl)silyl)but-3-en-2-yl)-1-methyl-1H-pyrrole (major isomer in endnote 16).** IR (neat): 3070 (w), 2961 (w), 1617 (w), 1480 (w), 1427 (w), 1409 (w), 1294 (w), 1249 (w), 1109 (w), 1002 (w), 891 (w), 822 (m), 777 (w), 736 (w), 701 (s), 654 (w), 474 (w), 445 (w)  $\text{cm}^{-1}$ ;  $^1\text{H}$  NMR (400 MHz,  $\text{CDCl}_3$ ):  $\delta$  7.55–7.52 (2H, m), 7.37–7.30 (3H, m), 6.47 (1H, dd,  $J = 2.8, 2.0$  Hz), 6.10–6.03 (2H, m), 5.99 (1H, dd,  $J = 3.6, 2.8$  Hz), 5.07 (1H, dd,  $J = 10.8, 1.2$  Hz), 4.73 (1H, dd,  $J = 17.6, 1.2$  Hz), 3.41 (3H, s), 1.50 (3H, s), 0.47 (3H, s), 0.43 (3H, s);  $^{13}\text{C}$  NMR (100 MHz,  $\text{CDCl}_3$ ):  $\delta$  143.2, 137.6, 135.4, 135.1, 129.1, 127.5, 123.3, 112.2, 108.4, 105.9, 36.7, 33.8, 20.6, -3.7, -3.8; HRMS (ESI+): Calcd for  $\text{C}_{17}\text{H}_{24}\text{N}_1\text{Si}_1$   $[\text{M}+\text{H}]^+$ : 270.1678, Found: 270.1666. Specific Rotation:  $[\alpha]_D^{20} +41.9$  ( $c$  0.67,  $\text{CHCl}_3$ ) for an enantiomerically enriched sample of 85:15 er.

Enantiomeric purity is determined by HPLC analysis of the derived primary alcohol (obtained from hydroboration of the terminal olefin with 9-BBN, followed by oxidation with  $\text{NaBO}_3 \cdot 4\text{H}_2\text{O}$ ) in comparison with authentic racemic material (90.7:9.3 er shown; Chiralcel OD-H column, 99/1 hexanes/*i*-PrOH, 1.0 mL/min, 220 nm).

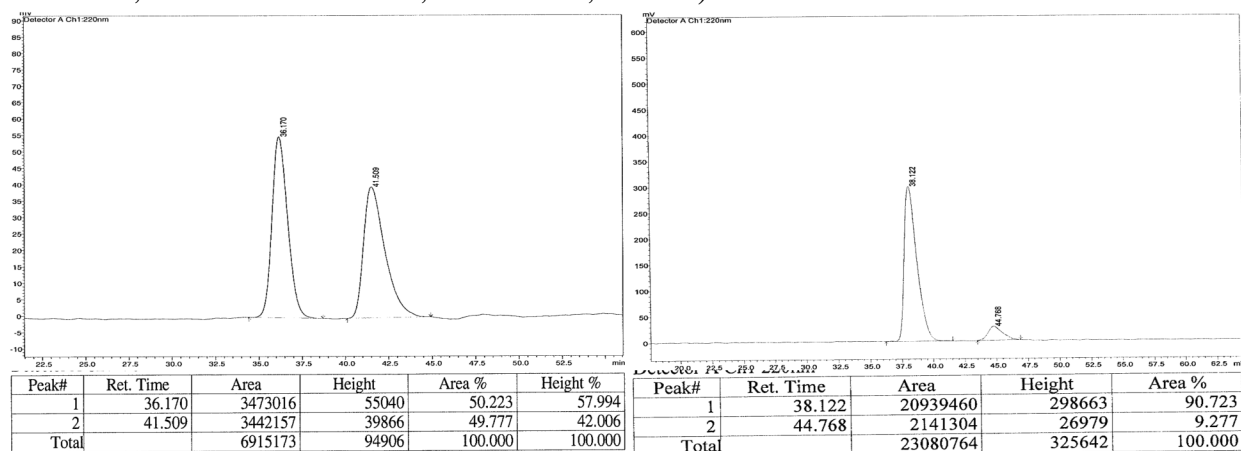

| Peak # | Time (mins) | Area (%) | Peak # | Time (mins) | Area (%) |
|--------|-------------|----------|--------|-------------|----------|
| 1      | 36.170      | 50.2     | 1      | 38.122      | 90.7     |
| 2      | 41.509      | 49.8     | 2      | 44.768      | 9.3      |

**Quaternary Carbon Stereogenic Centers through Copper-Catalyzed  
Enantioselective Allylic Substitutions with Readily Accessible Aryl-  
and Hetero-aryllithium Reagents and Aluminum Chlorides**

Fang Gao, Yunmi Lee, Kyoko Mandai, and Amir H. Hoveyda\*

*Department of Chemistry, Merkert Chemistry Center,  
Boston College, Chestnut Hill, Massachusetts 02467*

**SUPPORTING INFORMATION, PART B**

```

KM-III-230P
exp1 std1h
SAMPLE DEC. 8 VT
date Aug 23 2008 dfrq 399.772
solvent CDCl3 dn 1H
F1 ACQUISITION exp dof 0
sfreq 399.772 dm nmh
tn H1 dm c
ac 2.424 deq C
sw 4193.468 dres 200
fb 6080.6 dres 1.0
bs 3000 homo n
bs 50 vrf1e n
pwr 7.28 proc ft
di 1.000 fn not used f
nt 0 math
nt 128 wfr
nt 2 n wkp
alock not used wbs
gain not used wbs
fls 1.000
int n
in n
dp n
hs n
SP DISPLAY 200.0
wp 4197.6
vs 201
sc 380
nc 11.880
hnum 273.52
f1 39982.7
f1p 2982.3
ins 1.000
nm ph
    
```

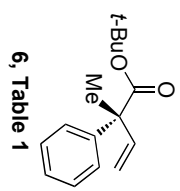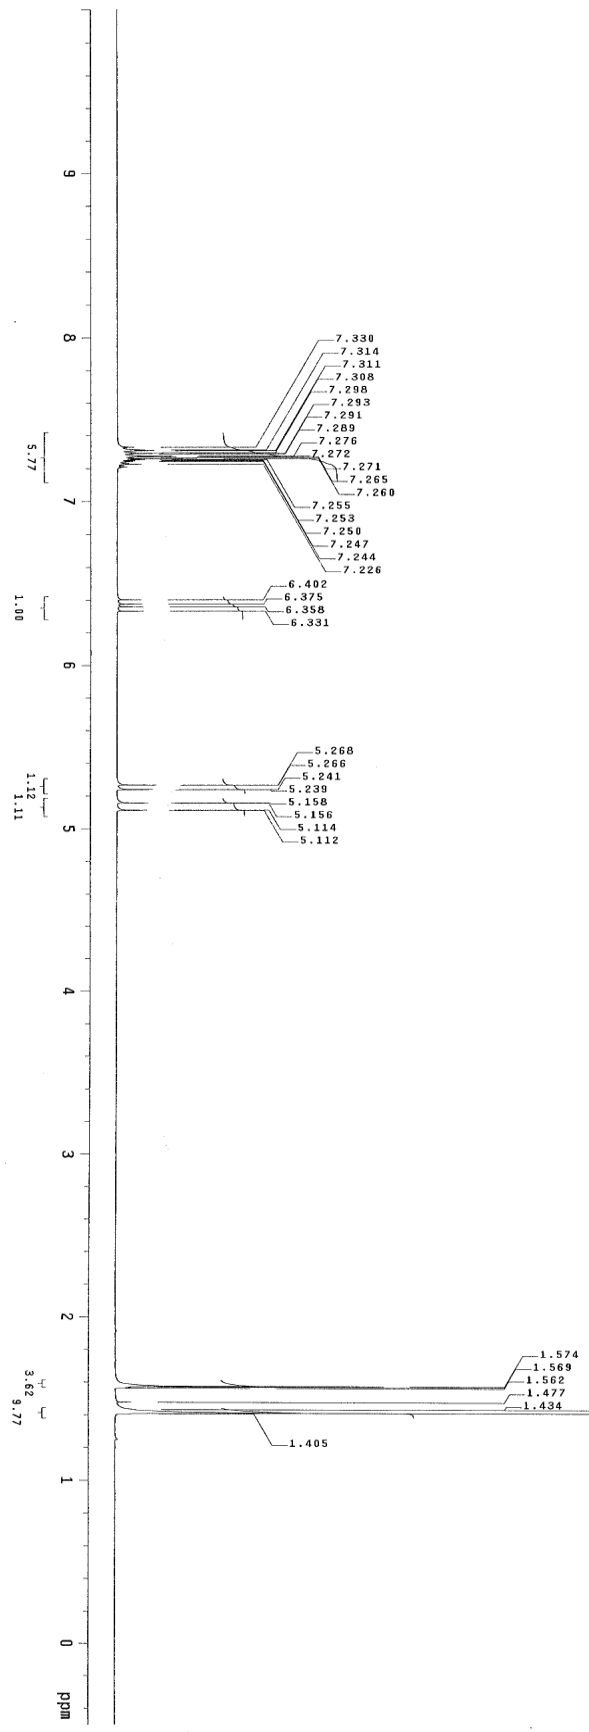

KM-III-230P  
Pulse Sequence: s2p1



YL-VIII-248A  
 exp1 Proton

|             |             |       |          |
|-------------|-------------|-------|----------|
| date        | NOV 18 2009 | temp  | 25.0     |
| solvent     | CDCl3       | gain  | not used |
| file        | exp         | Hz    | 400      |
| sw          | 6419.3      | Hz    | 0.00     |
| at          | 2.049       | pw90  | 11.000   |
| np          | 26254       | atfa  | 10.000   |
| fb          | 4000        | flags | n        |
| ss          | 4           | in    | n        |
| dl          | 2           | dp    | v        |
| nt          | 1.000       | hs    | m        |
| ct          | 40          | fn    | 65536    |
| TRANSMITTER | H1          | SP    | -2.7     |
| strq        | 399.786     | WP    | 3198.1   |
| tot         | 399.8       | rfl   | 3706.6   |
| tpwr        | 60          | rtp   | 2902.4   |
| pw          | 5.500       | lp    | 98.8     |
| DECOUPLER   | C13         | lp    | -17.8    |
| dn          | 0           | WC    | 250      |
| dot         | 0           | SC    | 0        |
| dm          | mn          | VS    | 50       |
| dmm         | C           | th    | 12       |
| dpwr        | 35          | ph    |          |
| dnt         | 29412       |       |          |

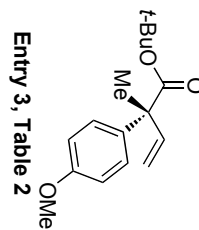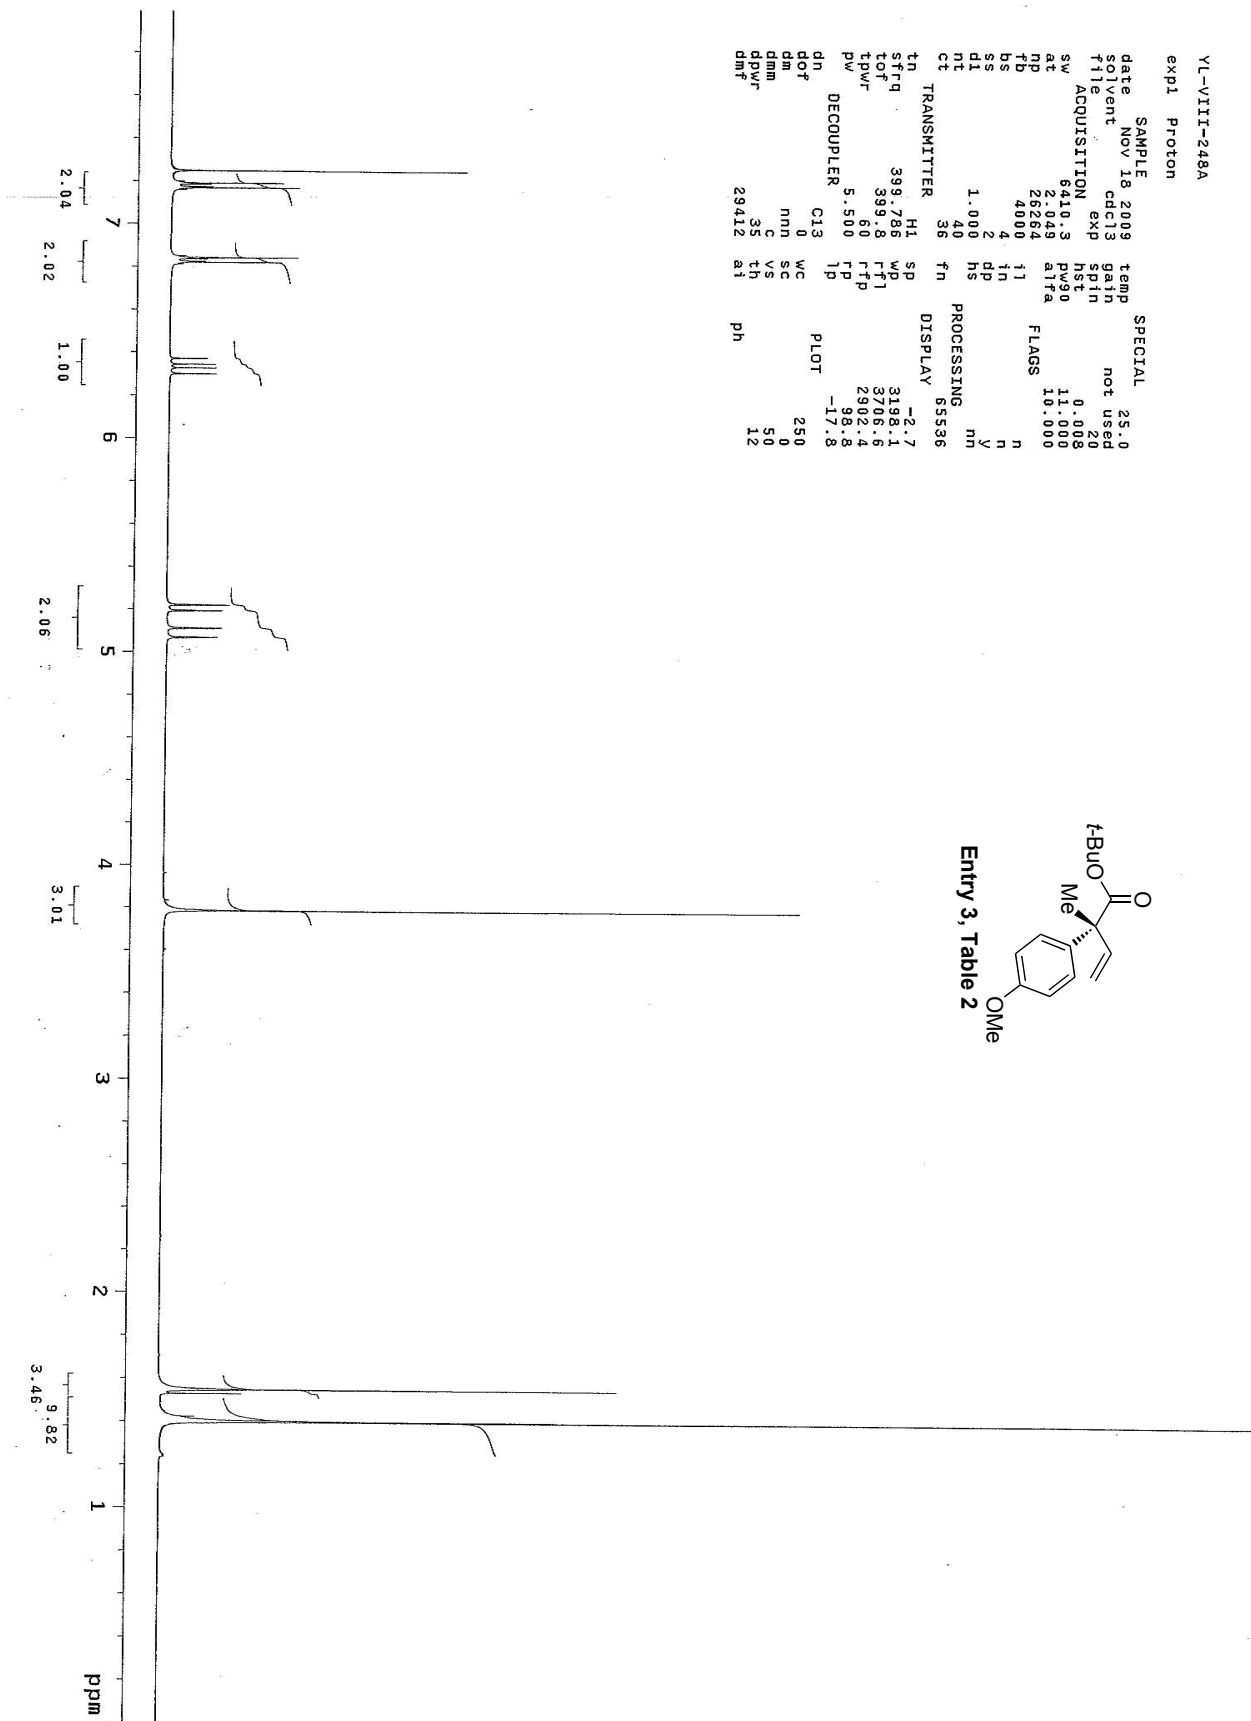





KM-IV-184-P  
 exp1 std1h  
 SAMPLE May 11 2018 Dec. 8 VT  
 date May 11 2018 dfreq 399.768  
 solvent DMSO d1  
 file 110013 dn  
 ACQUISITION exp dpwr 30  
 sfreq 399.768 dm nm  
 at 3.744 dmf 200  
 np 44932 dsrq 1.0  
 sw 6000.6 hsd  
 sb 5000 n  
 b0  
 tpr 57 wfile  
 pv 7.0 proc ft  
 df 1.258 tn not used f  
 nt 129 math  
 ct 12 werr  
 alock 5 wekp  
 gain not used  
 flas not used  
 wts  
 n1 n  
 n2 n  
 n3 n  
 n4 n  
 n5 n  
 n6 n  
 n7 n  
 n8 n  
 n9 n  
 n10 n  
 n11 n  
 n12 n  
 n13 n  
 n14 n  
 n15 n  
 n16 n  
 n17 n  
 n18 n  
 n19 n  
 n20 n  
 n21 n  
 n22 n  
 n23 n  
 n24 n  
 n25 n  
 n26 n  
 n27 n  
 n28 n  
 n29 n  
 n30 n  
 n31 n  
 n32 n  
 n33 n  
 n34 n  
 n35 n  
 n36 n  
 n37 n  
 n38 n  
 n39 n  
 n40 n  
 n41 n  
 n42 n  
 n43 n  
 n44 n  
 n45 n  
 n46 n  
 n47 n  
 n48 n  
 n49 n  
 n50 n  
 n51 n  
 n52 n  
 n53 n  
 n54 n  
 n55 n  
 n56 n  
 n57 n  
 n58 n  
 n59 n  
 n60 n  
 n61 n  
 n62 n  
 n63 n  
 n64 n  
 n65 n  
 n66 n  
 n67 n  
 n68 n  
 n69 n  
 n70 n  
 n71 n  
 n72 n  
 n73 n  
 n74 n  
 n75 n  
 n76 n  
 n77 n  
 n78 n  
 n79 n  
 n80 n  
 n81 n  
 n82 n  
 n83 n  
 n84 n  
 n85 n  
 n86 n  
 n87 n  
 n88 n  
 n89 n  
 n90 n  
 n91 n  
 n92 n  
 n93 n  
 n94 n  
 n95 n  
 n96 n  
 n97 n  
 n98 n  
 n99 n  
 n100 n  
 n101 n  
 n102 n  
 n103 n  
 n104 n  
 n105 n  
 n106 n  
 n107 n  
 n108 n  
 n109 n  
 n110 n  
 n111 n  
 n112 n  
 n113 n  
 n114 n  
 n115 n  
 n116 n  
 n117 n  
 n118 n  
 n119 n  
 n120 n  
 n121 n  
 n122 n  
 n123 n  
 n124 n  
 n125 n  
 n126 n  
 n127 n  
 n128 n  
 n129 n  
 n130 n  
 n131 n  
 n132 n  
 n133 n  
 n134 n  
 n135 n  
 n136 n  
 n137 n  
 n138 n  
 n139 n  
 n140 n  
 n141 n  
 n142 n  
 n143 n  
 n144 n  
 n145 n  
 n146 n  
 n147 n  
 n148 n  
 n149 n  
 n150 n  
 n151 n  
 n152 n  
 n153 n  
 n154 n  
 n155 n  
 n156 n  
 n157 n  
 n158 n  
 n159 n  
 n160 n  
 n161 n  
 n162 n  
 n163 n  
 n164 n  
 n165 n  
 n166 n  
 n167 n  
 n168 n  
 n169 n  
 n170 n  
 n171 n  
 n172 n  
 n173 n  
 n174 n  
 n175 n  
 n176 n  
 n177 n  
 n178 n  
 n179 n  
 n180 n  
 n181 n  
 n182 n  
 n183 n  
 n184 n  
 n185 n  
 n186 n  
 n187 n  
 n188 n  
 n189 n  
 n190 n  
 n191 n  
 n192 n  
 n193 n  
 n194 n  
 n195 n  
 n196 n  
 n197 n  
 n198 n  
 n199 n  
 n200 n  
 n201 n  
 n202 n  
 n203 n  
 n204 n  
 n205 n  
 n206 n  
 n207 n  
 n208 n  
 n209 n  
 n210 n  
 n211 n  
 n212 n  
 n213 n  
 n214 n  
 n215 n  
 n216 n  
 n217 n  
 n218 n  
 n219 n  
 n220 n  
 n221 n  
 n222 n  
 n223 n  
 n224 n  
 n225 n  
 n226 n  
 n227 n  
 n228 n  
 n229 n  
 n230 n  
 n231 n  
 n232 n  
 n233 n  
 n234 n  
 n235 n  
 n236 n  
 n237 n  
 n238 n  
 n239 n  
 n240 n  
 n241 n  
 n242 n  
 n243 n  
 n244 n  
 n245 n  
 n246 n  
 n247 n  
 n248 n  
 n249 n  
 n250 n  
 n251 n  
 n252 n  
 n253 n  
 n254 n  
 n255 n  
 n256 n  
 n257 n  
 n258 n  
 n259 n  
 n260 n  
 n261 n  
 n262 n  
 n263 n  
 n264 n  
 n265 n  
 n266 n  
 n267 n  
 n268 n  
 n269 n  
 n270 n  
 n271 n  
 n272 n  
 n273 n  
 n274 n  
 n275 n  
 n276 n  
 n277 n  
 n278 n  
 n279 n  
 n280 n  
 n281 n  
 n282 n  
 n283 n  
 n284 n  
 n285 n  
 n286 n  
 n287 n  
 n288 n  
 n289 n  
 n290 n  
 n291 n  
 n292 n  
 n293 n  
 n294 n  
 n295 n  
 n296 n  
 n297 n  
 n298 n  
 n299 n  
 n300 n  
 n301 n  
 n302 n  
 n303 n  
 n304 n  
 n305 n  
 n306 n  
 n307 n  
 n308 n  
 n309 n  
 n310 n  
 n311 n  
 n312 n  
 n313 n  
 n314 n  
 n315 n  
 n316 n  
 n317 n  
 n318 n  
 n319 n  
 n320 n  
 n321 n  
 n322 n  
 n323 n  
 n324 n  
 n325 n  
 n326 n  
 n327 n  
 n328 n  
 n329 n  
 n330 n  
 n331 n  
 n332 n  
 n333 n  
 n334 n  
 n335 n  
 n336 n  
 n337 n  
 n338 n  
 n339 n  
 n340 n  
 n341 n  
 n342 n  
 n343 n  
 n344 n  
 n345 n  
 n346 n  
 n347 n  
 n348 n  
 n349 n  
 n350 n  
 n351 n  
 n352 n  
 n353 n  
 n354 n  
 n355 n  
 n356 n  
 n357 n  
 n358 n  
 n359 n  
 n360 n  
 n361 n  
 n362 n  
 n363 n  
 n364 n  
 n365 n  
 n366 n  
 n367 n  
 n368 n  
 n369 n  
 n370 n  
 n371 n  
 n372 n  
 n373 n  
 n374 n  
 n375 n  
 n376 n  
 n377 n  
 n378 n  
 n379 n  
 n380 n  
 n381 n  
 n382 n  
 n383 n  
 n384 n  
 n385 n  
 n386 n  
 n387 n  
 n388 n  
 n389 n  
 n390 n  
 n391 n  
 n392 n  
 n393 n  
 n394 n  
 n395 n  
 n396 n  
 n397 n  
 n398 n  
 n399 n  
 n400 n  
 n401 n  
 n402 n  
 n403 n  
 n404 n  
 n405 n  
 n406 n  
 n407 n  
 n408 n  
 n409 n  
 n410 n  
 n411 n  
 n412 n  
 n413 n  
 n414 n  
 n415 n  
 n416 n  
 n417 n  
 n418 n  
 n419 n  
 n420 n  
 n421 n  
 n422 n  
 n423 n  
 n424 n  
 n425 n  
 n426 n  
 n427 n  
 n428 n  
 n429 n  
 n430 n  
 n431 n  
 n432 n  
 n433 n  
 n434 n  
 n435 n  
 n436 n  
 n437 n  
 n438 n  
 n439 n  
 n440 n  
 n441 n  
 n442 n  
 n443 n  
 n444 n  
 n445 n  
 n446 n  
 n447 n  
 n448 n  
 n449 n  
 n450 n  
 n451 n  
 n452 n  
 n453 n  
 n454 n  
 n455 n  
 n456 n  
 n457 n  
 n458 n  
 n459 n  
 n460 n  
 n461 n  
 n462 n  
 n463 n  
 n464 n  
 n465 n  
 n466 n  
 n467 n  
 n468 n  
 n469 n  
 n470 n  
 n471 n  
 n472 n  
 n473 n  
 n474 n  
 n475 n  
 n476 n  
 n477 n  
 n478 n  
 n479 n  
 n480 n  
 n481 n  
 n482 n  
 n483 n  
 n484 n  
 n485 n  
 n486 n  
 n487 n  
 n488 n  
 n489 n  
 n490 n  
 n491 n  
 n492 n  
 n493 n  
 n494 n  
 n495 n  
 n496 n  
 n497 n  
 n498 n  
 n499 n  
 n500 n  
 n501 n  
 n502 n  
 n503 n  
 n504 n  
 n505 n  
 n506 n  
 n507 n  
 n508 n  
 n509 n  
 n510 n  
 n511 n  
 n512 n  
 n513 n  
 n514 n  
 n515 n  
 n516 n  
 n517 n  
 n518 n  
 n519 n  
 n520 n  
 n521 n  
 n522 n  
 n523 n  
 n524 n  
 n525 n  
 n526 n  
 n527 n  
 n528 n  
 n529 n  
 n530 n  
 n531 n  
 n532 n  
 n533 n  
 n534 n  
 n535 n  
 n536 n  
 n537 n  
 n538 n  
 n539 n  
 n540 n  
 n541 n  
 n542 n  
 n543 n  
 n544 n  
 n545 n  
 n546 n  
 n547 n  
 n548 n  
 n549 n  
 n550 n  
 n551 n  
 n552 n  
 n553 n  
 n554 n  
 n555 n  
 n556 n  
 n557 n  
 n558 n  
 n559 n  
 n560 n  
 n561 n  
 n562 n  
 n563 n  
 n564 n  
 n565 n  
 n566 n  
 n567 n  
 n568 n  
 n569 n  
 n570 n  
 n571 n  
 n572 n  
 n573 n  
 n574 n  
 n575 n  
 n576 n  
 n577 n  
 n578 n  
 n579 n  
 n580 n  
 n581 n  
 n582 n  
 n583 n  
 n584 n  
 n585 n  
 n586 n  
 n587 n  
 n588 n  
 n589 n  
 n590 n  
 n591 n  
 n592 n  
 n593 n  
 n594 n  
 n595 n  
 n596 n  
 n597 n  
 n598 n  
 n599 n  
 n600 n  
 n601 n  
 n602 n  
 n603 n  
 n604 n  
 n605 n  
 n606 n  
 n607 n  
 n608 n  
 n609 n  
 n610 n  
 n611 n  
 n612 n  
 n613 n  
 n614 n  
 n615 n  
 n616 n  
 n617 n  
 n618 n  
 n619 n  
 n620 n  
 n621 n  
 n622 n  
 n623 n  
 n624 n  
 n625 n  
 n626 n  
 n627 n  
 n628 n  
 n629 n  
 n630 n  
 n631 n  
 n632 n  
 n633 n  
 n634 n  
 n635 n  
 n636 n  
 n637 n  
 n638 n  
 n639 n  
 n640 n  
 n641 n  
 n642 n  
 n643 n  
 n644 n  
 n645 n  
 n646 n  
 n647 n  
 n648 n  
 n649 n  
 n650 n  
 n651 n  
 n652 n  
 n653 n  
 n654 n  
 n655 n  
 n656 n  
 n657 n  
 n658 n  
 n659 n  
 n660 n  
 n661 n  
 n662 n  
 n663 n  
 n664 n  
 n665 n  
 n666 n  
 n667 n  
 n668 n  
 n669 n  
 n670 n  
 n671 n  
 n672 n  
 n673 n  
 n674 n  
 n675 n  
 n676 n  
 n677 n  
 n678 n  
 n679 n  
 n680 n  
 n681 n  
 n682 n  
 n683 n  
 n684 n  
 n685 n  
 n686 n  
 n687 n  
 n688 n  
 n689 n  
 n690 n  
 n691 n  
 n692 n  
 n693 n  
 n694 n  
 n695 n  
 n696 n  
 n697 n  
 n698 n  
 n699 n  
 n700 n  
 n701 n  
 n702 n  
 n703 n  
 n704 n  
 n705 n  
 n706 n  
 n707 n  
 n708 n  
 n709 n  
 n710 n  
 n711 n  
 n712 n  
 n713 n  
 n714 n  
 n715 n  
 n716 n  
 n717 n  
 n718 n  
 n719 n  
 n720 n  
 n721 n  
 n722 n  
 n723 n  
 n724 n  
 n725 n  
 n726 n  
 n727 n  
 n728 n  
 n729 n  
 n730 n  
 n731 n  
 n732 n  
 n733 n  
 n734 n  
 n735 n  
 n736 n  
 n737 n  
 n738 n  
 n739 n  
 n740 n  
 n741 n  
 n742 n  
 n743 n  
 n744 n  
 n745 n  
 n746 n  
 n747 n  
 n748 n  
 n749 n  
 n750 n  
 n751 n  
 n752 n  
 n753 n  
 n754 n  
 n755 n  
 n756 n  
 n757 n  
 n758 n  
 n759 n  
 n760 n  
 n761 n  
 n762 n  
 n763 n  
 n764 n  
 n765 n  
 n766 n  
 n767 n  
 n768 n  
 n769 n  
 n770 n  
 n771 n  
 n772 n  
 n773 n  
 n774 n  
 n775 n  
 n776 n  
 n777 n  
 n778 n  
 n779 n  
 n780 n  
 n781 n  
 n782 n  
 n783 n  
 n784 n  
 n785 n  
 n786 n  
 n787 n  
 n788 n  
 n789 n  
 n790 n  
 n791 n  
 n792 n  
 n793 n  
 n794 n  
 n795 n  
 n796 n  
 n797 n  
 n798 n  
 n799 n  
 n800 n  
 n801 n  
 n802 n  
 n803 n  
 n804 n  
 n805 n  
 n806 n  
 n807 n  
 n808 n  
 n809 n  
 n810 n  
 n811 n  
 n812 n  
 n813 n  
 n814 n  
 n815 n  
 n816 n  
 n817 n  
 n818 n  
 n819 n  
 n820 n  
 n821 n  
 n822 n  
 n823 n  
 n824 n  
 n825 n  
 n826 n  
 n827 n  
 n828 n  
 n829 n  
 n830 n  
 n831 n  
 n832 n  
 n833 n  
 n834 n  
 n835 n  
 n836 n  
 n837 n  
 n838 n  
 n839 n  
 n840 n  
 n841 n  
 n842 n  
 n843 n  
 n844 n  
 n845 n  
 n846 n  
 n847 n  
 n848 n  
 n849 n  
 n850 n  
 n851 n  
 n852 n  
 n853 n  
 n854 n  
 n855 n  
 n856 n  
 n857 n  
 n858 n  
 n859 n  
 n860 n  
 n861 n  
 n862 n  
 n863 n  
 n864 n  
 n865 n  
 n866 n  
 n867 n  
 n868 n  
 n869 n  
 n870 n  
 n871 n  
 n872 n  
 n873 n  
 n874 n  
 n875 n  
 n876 n  
 n877 n  
 n878 n  
 n879 n  
 n880 n  
 n881 n  
 n882 n  
 n883 n  
 n884 n  
 n885 n  
 n886 n  
 n887 n  
 n888 n  
 n889 n  
 n890 n  
 n891 n  
 n892 n  
 n893 n  
 n894 n  
 n895 n  
 n896 n  
 n897 n  
 n898 n  
 n899 n  
 n900 n  
 n901 n  
 n902 n  
 n903 n  
 n904 n  
 n905 n  
 n906 n  
 n907 n  
 n908 n  
 n909 n  
 n910 n  
 n911 n  
 n912 n  
 n913 n  
 n914 n  
 n915 n  
 n916 n  
 n917 n  
 n918 n  
 n919 n  
 n920 n  
 n921 n  
 n922 n  
 n923 n  
 n924 n  
 n925 n  
 n926 n  
 n927 n  
 n928 n  
 n929 n  
 n930 n  
 n931 n  
 n932 n  
 n933 n  
 n934 n  
 n935 n  
 n936 n  
 n937 n  
 n938 n  
 n939 n  
 n940 n  
 n941 n  
 n942 n  
 n943 n  
 n944 n  
 n945 n  
 n946 n  
 n947 n  
 n948 n  
 n949 n  
 n950 n  
 n951 n  
 n952 n  
 n953 n  
 n954 n  
 n955 n  
 n956 n  
 n957 n  
 n958 n  
 n959 n  
 n960 n  
 n961 n  
 n962 n  
 n963 n  
 n964 n  
 n965 n  
 n966 n  
 n967 n  
 n968 n  
 n969 n  
 n970 n  
 n971 n  
 n972 n  
 n973 n  
 n974 n  
 n975 n  
 n976 n  
 n977 n  
 n978 n  
 n979 n  
 n980 n  
 n981 n  
 n982 n  
 n983 n  
 n984 n  
 n985 n  
 n986 n  
 n987 n  
 n988 n  
 n989 n  
 n990 n  
 n991 n  
 n992 n  
 n993 n  
 n994 n  
 n995 n  
 n996 n  
 n997 n  
 n998 n  
 n999 n  
 n1000 n  
 n1001 n  
 n1002 n  
 n1003 n  
 n1004 n  
 n1005 n  
 n1006 n  
 n1007 n  
 n1008 n  
 n1009 n  
 n1010 n  
 n1011 n  
 n1012 n  
 n1013 n  
 n1014 n  
 n1015 n  
 n1016 n  
 n1017 n  
 n1018 n  
 n1019 n  
 n1020 n  
 n1021 n  
 n1022 n  
 n1023 n  
 n1024 n  
 n1025 n  
 n1026 n  
 n1027 n  
 n1028 n  
 n1029 n  
 n1030 n  
 n1031 n  
 n1032 n  
 n1033 n  
 n1034 n  
 n1035 n  
 n1036 n  
 n1037 n  
 n1038 n  
 n1039 n  
 n1040 n  
 n1041 n  
 n1042 n  
 n1043 n  
 n1044 n  
 n1045 n  
 n1046 n  
 n1047 n  
 n1048 n  
 n1049 n  
 n1050 n  
 n1051 n  
 n1052 n  
 n1053 n  
 n1054 n  
 n1055 n  
 n1056 n  
 n1057 n  
 n1058 n  
 n1059 n  
 n1060 n  
 n1061 n  
 n1062 n  
 n1063 n  
 n1064 n  
 n1065 n  
 n1066 n  
 n1067 n  
 n1068 n  
 n1069 n  
 n1070 n  
 n1071 n  
 n1072 n  
 n1073 n  
 n1074 n  
 n1075 n  
 n1076 n  
 n1077 n  
 n1078 n  
 n1079 n  
 n1080 n  
 n1081 n  
 n1082 n  
 n1083 n  
 n1084 n  
 n1085 n  
 n1086 n  
 n1087 n  
 n1088 n  
 n1089 n  
 n1090 n  
 n1091 n  
 n1092 n  
 n1093 n  
 n1094 n  
 n1095 n  
 n1096 n  
 n1097 n  
 n1098 n  
 n1099 n  
 n1100 n  
 n1101 n  
 n1102 n  
 n1103 n  
 n1104 n  
 n1105 n  
 n1106 n  
 n1107 n  
 n1108 n  
 n1109 n  
 n1110 n  
 n1111 n  
 n1112 n  
 n1113 n  
 n1114 n  
 n1115 n  
 n1116 n  
 n1117 n  
 n1118 n  
 n1119 n  
 n1120 n  
 n1121 n  
 n1122 n  
 n1123 n  
 n1124 n  
 n1125 n  
 n1126 n  
 n1127 n  
 n1128 n  
 n1129 n  
 n1130 n  
 n1131 n  
 n1132 n  
 n1133 n  
 n1134 n  
 n1135 n  
 n1136 n  
 n1137 n  
 n1138 n  
 n1139 n  
 n1140 n  
 n1141 n  
 n1142 n  
 n1143 n  
 n1144 n  
 n1145 n  
 n1146 n  
 n1147 n  
 n1148 n  
 n1149 n  
 n1150 n  
 n1151 n  
 n1152 n  
 n1153 n  
 n1154 n  
 n1155 n  
 n1156 n  
 n1157 n  
 n1158 n  
 n1159 n  
 n1160 n  
 n1161 n  
 n1162 n  
 n1163 n  
 n1164 n  
 n1165 n  
 n1166 n  
 n1167 n  
 n1168 n  
 n1169 n  
 n1170 n  
 n1171 n  
 n1172 n  
 n1173 n  
 n1174 n  
 n1175 n  
 n1176 n  
 n1177 n  
 n1178 n  
 n1179 n  
 n1180 n  
 n1181 n  
 n1182 n  
 n1183 n  
 n1184 n  
 n1185 n  
 n1186 n  
 n1187 n  
 n1188 n  
 n1189 n  
 n1190 n  
 n1191 n  
 n1192 n  
 n1193 n  
 n1194 n  
 n1195 n  
 n1196 n  
 n1197 n  
 n1198 n  
 n1199 n  
 n1200 n  
 n1201 n  
 n1202 n  
 n1203 n  
 n1204 n  
 n1205 n  
 n1206 n  
 n1207 n  
 n1208 n  
 n1209 n  
 n1210 n  
 n1211 n  
 n1212 n  
 n1213 n  
 n1214 n  
 n1215 n  
 n1216 n  
 n1217 n  
 n1218 n  
 n1219 n  
 n1220 n  
 n1221 n  
 n1222 n  
 n1223 n  
 n1224 n  
 n1225 n  
 n1226 n  
 n1227 n  
 n1228 n  
 n1229 n  
 n1230 n  
 n1231 n  
 n1232 n  
 n1233 n  
 n1234 n  
 n1235 n  
 n1236 n  
 n1237 n  
 n1238 n  
 n1239 n  
 n1240 n  
 n1241 n  
 n1242 n  
 n1243 n  
 n1244 n  
 n1245 n  
 n1246 n  
 n1247 n  
 n1248 n  
 n1249 n  
 n1250 n  
 n1251 n  
 n1252 n  
 n1253 n  
 n1254 n  
 n1255 n  
 n1256 n  
 n1257 n  
 n1258 n  
 n1259 n  
 n1260 n  
 n1261 n  
 n1262 n  
 n1263 n  
 n1264 n  
 n1265 n  
 n1266 n  
 n1267 n  
 n1268 n  
 n1269 n  
 n1270 n  
 n1271 n  
 n1272 n  
 n1273 n  
 n1274 n  
 n1275 n  
 n1276 n  
 n1277 n  
 n1278 n  
 n1279 n  
 n1280 n  
 n1281 n  
 n1282 n  
 n1283 n  
 n1284 n  
 n1285 n  
 n1286 n  
 n1287 n  
 n1288 n  
 n1289 n  
 n1290 n  
 n1291 n  
 n1292 n  
 n1293 n  
 n1294 n  
 n1295 n  
 n1296 n  
 n1297 n  
 n1298 n  
 n1299 n  
 n1300 n  
 n1301 n  
 n1302 n  
 n1303 n  
 n1304 n  
 n1305 n  
 n1306 n  
 n1307 n  
 n1308 n  
 n1309 n  
 n1310 n  
 n1311 n  
 n1312 n  
 n1313 n  
 n1314 n

YL-VIII-249A  
 exp1 Proton

|             |             |            |          |
|-------------|-------------|------------|----------|
| date        | NOV 17 2009 | temp       | 25.0     |
| solvent     | CDCl3       | gain       | not used |
| file        | exp         | spin       | 20       |
| ACQUISITION |             | ht         | 0.008    |
| sw          | 6410.3      | pw90       | 11.000   |
| at          | 2.049       | alfa       | 10.000   |
| np          | 26264       | FLAGS      |          |
| fb          | 4000        | f1         | n        |
| bs          |             | in         | n        |
| ss          |             | dp         | y        |
| di          | 1.000       | hs         | nh       |
| nt          | 40          | PROCESSING | 65536    |
| ct          | 20          | fn         | DISPLAY  |
| TRANSMITTER |             | HI         | 3.7      |
| tn          |             | SP         | 3202.6   |
| sfrq        | 399.786     | WP         | 3705.5   |
| tof         | 399.8       | rf1        | 2902.4   |
| tpwr        | 60          | rff        | 98.0     |
| pw          | 5.500       | fp         | 0        |
| DECOUPLER   |             | lp         |          |
| dn          | C13         | WC         | 250      |
| dof         | 0           | SC         | 0        |
| dm          | nmn         | VS         | 189      |
| dmm         | C           | YH         | 12       |
| dpm         | 35          | PH         |          |
| dppr        | 35          |            |          |
| dprf        | at1         |            |          |

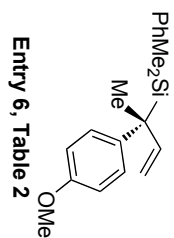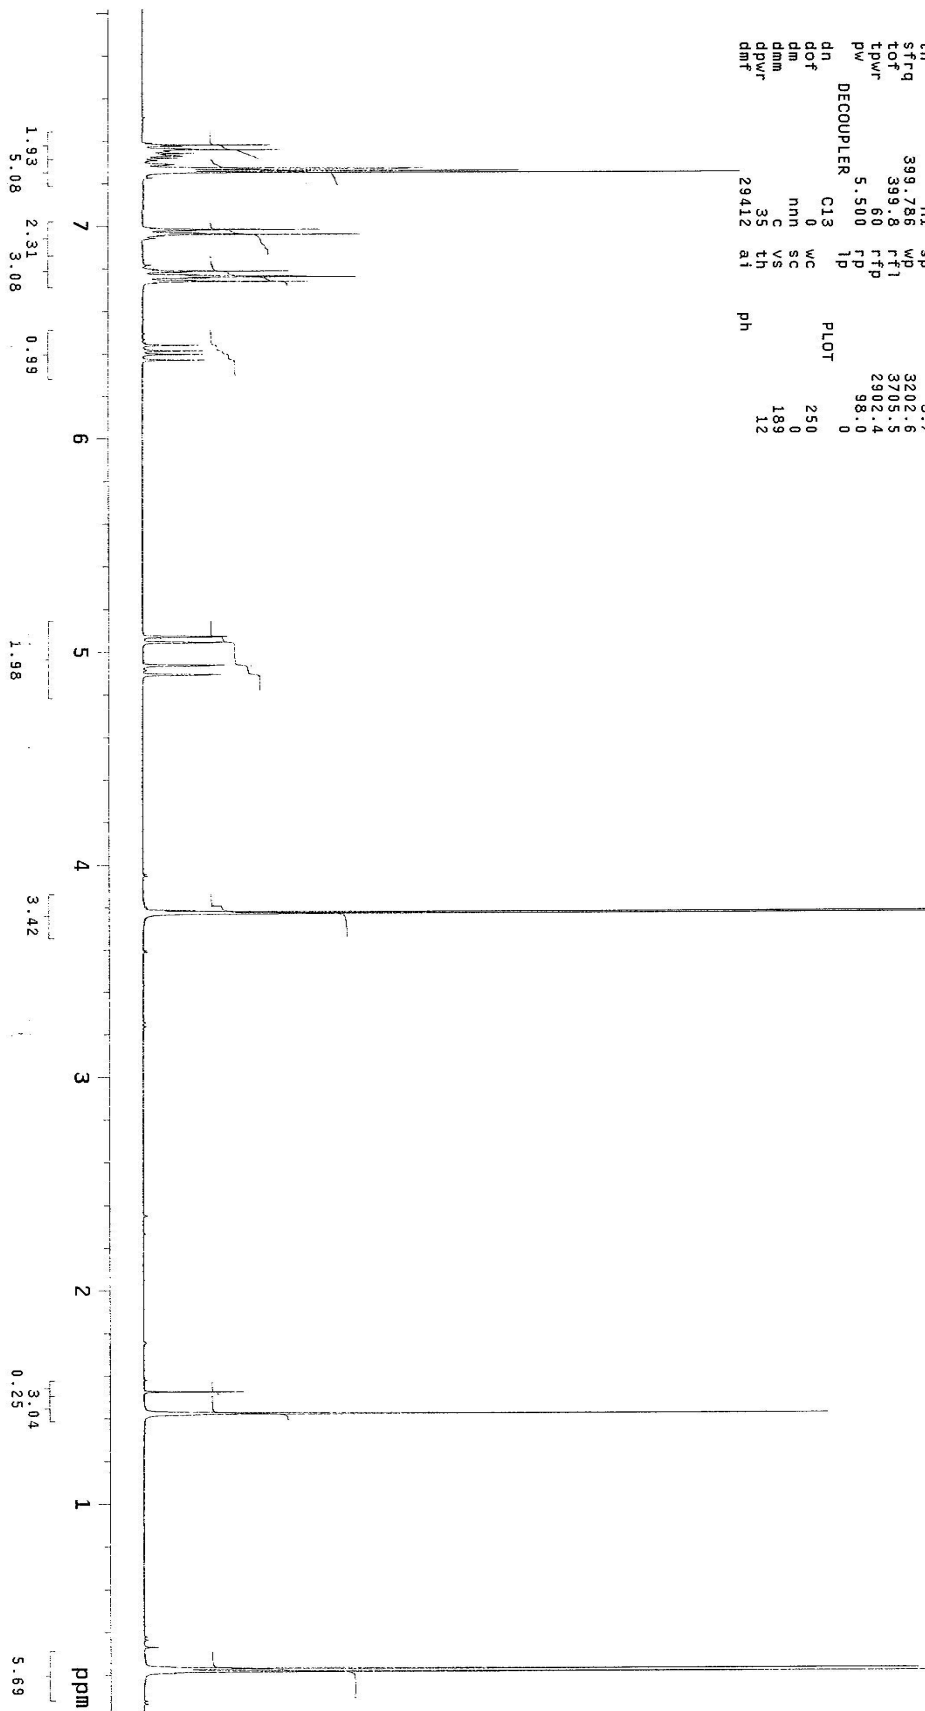



KM-IV-237-p  
expl stidh

```

SAMPLE          DEC. 8 17
date Jul 16, 2019  dtq. 399.768
solvent CDCl3    dn 30
f1 file /export/home/~dpur 30
mandat/km-iv-237-40f 0
ACQUISITION 110 dm n/c
sfrq 399.768 dfz 200
tn 3.244 frs3 1.0
at 4.472 nms 0
SP 6000.45 nms PROCESSING n
fb 3000 wf1 file n
bs 4 pproc not used f
tpr 57 math
d1 1.256
tof 0 verr
nt 128 wexp
g1 lock 32 wts
gain not used
flags n
11 n
dd n
hs n
DISPLAY n
SP 4200.0
VS 43201.4
SC 0
WC 11.380
N2MM 388.93
RFL 1001.2
rfp 0
tn 42
nm 1.000
ph
    
```

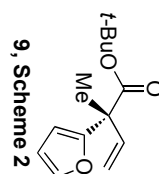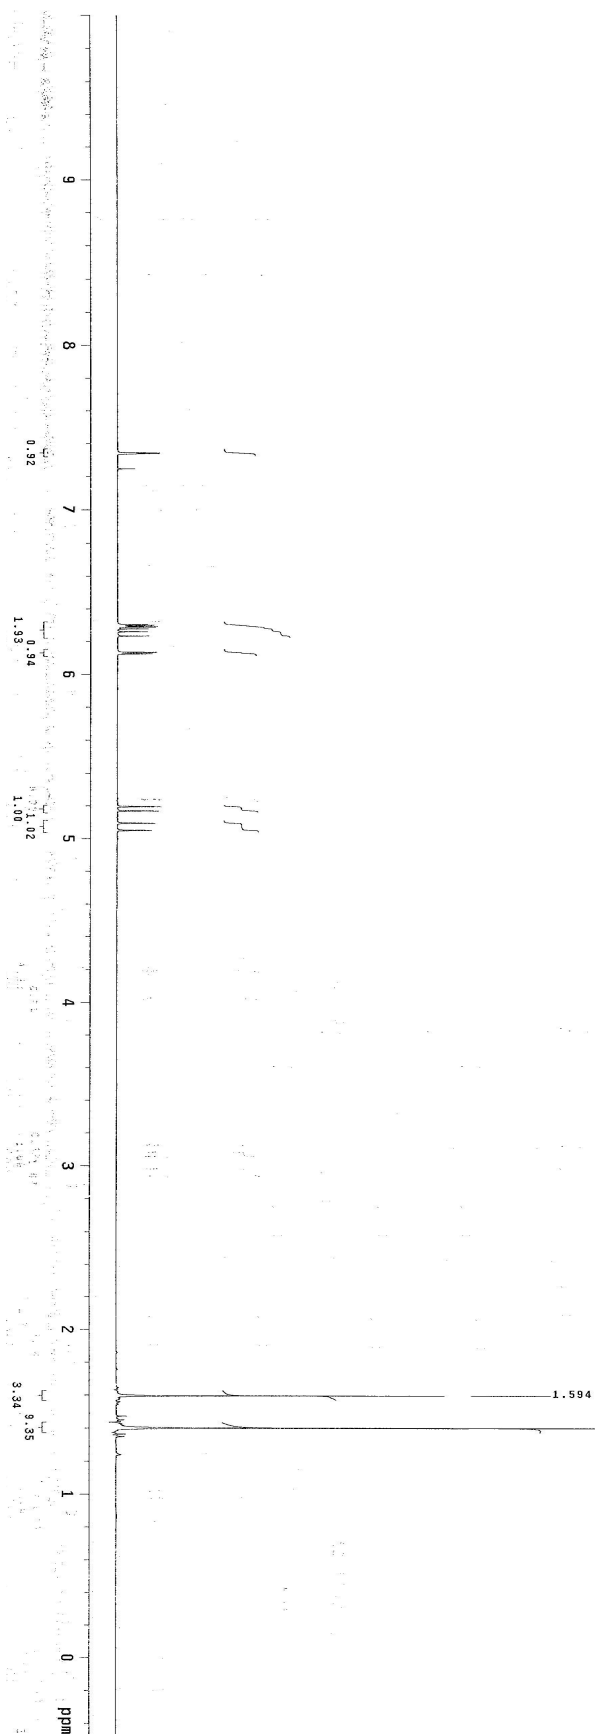

YL-VIII-286A  
expt6 Proton

|             |             |          |        |
|-------------|-------------|----------|--------|
| date        | Dec 22 2009 | temp     | 25.0   |
| solvent     | cdcl3       | not used |        |
| file        | cdcl3       | g41n     | 0.008  |
| ACQUISITION | exp         | het      | 11.000 |
| sw          | 6410.3      | pw90     | 10.000 |
| at          | 2.049       | atfa     |        |
| np          | 26264       | flags    |        |
| bs          | 4000        | n        |        |
| ss          | 4           | h        |        |
| di          | 2           | y        |        |
| nt          | 1.000       | hs       |        |
| ct          | 40          | fn       |        |
|             | 28          | DISPLAY  | 65536  |
| TRANSMITTER | H1          | SP       | -5.0   |
| stfq        | 399.786     | WD       | 3209.6 |
| tof         | 399.8       | ft1      | 3702.3 |
| tpwr        | 60          | ftp      | 2902.4 |
| pw          | 5.500       | fd       | 179.5  |
| DECOUPLER   | C13         | lp       | 0      |
| dn          | 0           | WC       | 250    |
| dof         | 0           | sc       | 0      |
| dm          | 35          | vs       | 140    |
| dmm         | 35          | th       | 12     |
| dpwr        | 29412       | at       |        |
| dmt         |             | ph       |        |

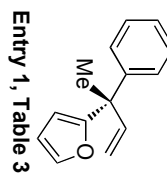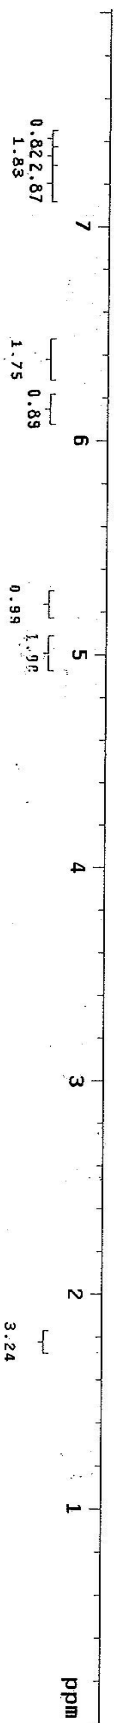

YL-KM-4-240B

expi Proton

|             |             |            |          |
|-------------|-------------|------------|----------|
| date        | Nov 18 2009 | temp       | 25.0     |
| solvent     | cdcl3       | gain       | not used |
| file        | exp         | hst        | 80       |
| ACQUISITION | 6410.3      | pw90       | 0.008    |
| sw          | 2.049       | atfa       | 11.000   |
| at          | 26264       | iflags     | 10.000   |
| np          | 4000        | fl         | n        |
| fd          | 4           | in         | y        |
| bs          | 2           | dp         | n        |
| ss          | 1.000       | hs         | n        |
| di          | 40          | fn         | 65536    |
| nt          | 24          | PROCESSING | nm       |
| ct          | TRANSMITTER | DISPLAY    | 65536    |
| tn          | H1          | SP         | -6.3     |
| sfreq       | 399.786     | wd         | 3204.9   |
| tof         | 399.8       | f1         | 808.4    |
| tpwr        | 5.500       | f2p        | 100.3    |
| pv          | 5.500       | lp         | 0        |
| DECOUPLER   | C13         | WC         | 250      |
| dn          | 0           | sc         | 0        |
| dof         | mn          | vs         | 417      |
| dm          | mn          | vs         | 417      |
| dmm         | 35          | tn         | 12       |
| dpwr        | 29412       | at         | 12       |
| dnt         |             | ph         |          |

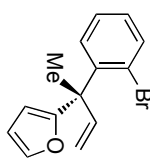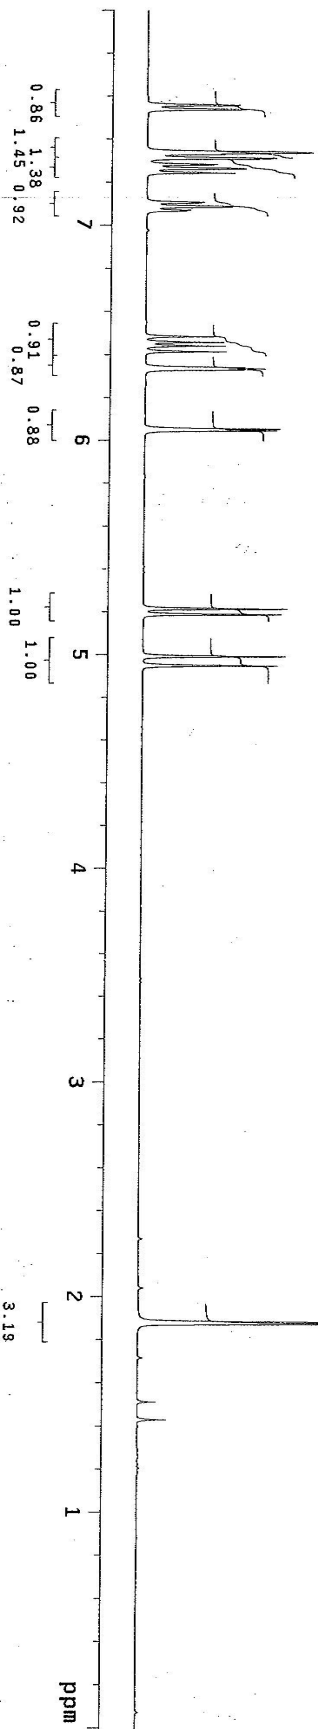

YL-VIII-287A  
exp26 Proton

|             |             |            |          |
|-------------|-------------|------------|----------|
| date        | Dec 22 2009 | temp       | 25.0     |
| solvent     | cdcl3       | gain       | not used |
| file        | exp         | spn        | 20       |
| ACQUISITION | 6410.3      | hst        | 0.008    |
| sw          | 2.049       | pw90       | 11.000   |
| at          | 26264       | af         | 10.000   |
| np          | 4000        | flags      |          |
| fb          | 4           | in         | n        |
| bs          | 2           | dp         | v        |
| ss          | 1.000       | hs         | nn       |
| di          | 40          | fn         | 65536    |
| nt          | 24          | PROCESSING |          |
| ct          | TRANSMITTER | DISPLAY    |          |
| tn          | H1          | SP         | 5.4      |
| stfq        | 399.786     | WD         | 3195.5   |
| tof         | 399.8       | rfl        | 806.4    |
| tpwr        | 60          | rfd        | 0        |
| pw          | 5.500       | lp         | -176.7   |
| DECOUPLER   | C13         | lp         | 0        |
| dn          | 0           | WC         | 250      |
| dof         | nn          | SC         | 117      |
| dia         | c           | VS         | 117      |
| dmm         | 35          | th         | 12       |
| dpwr        | 29412       | at         |          |
| dmf         |             | ph         |          |

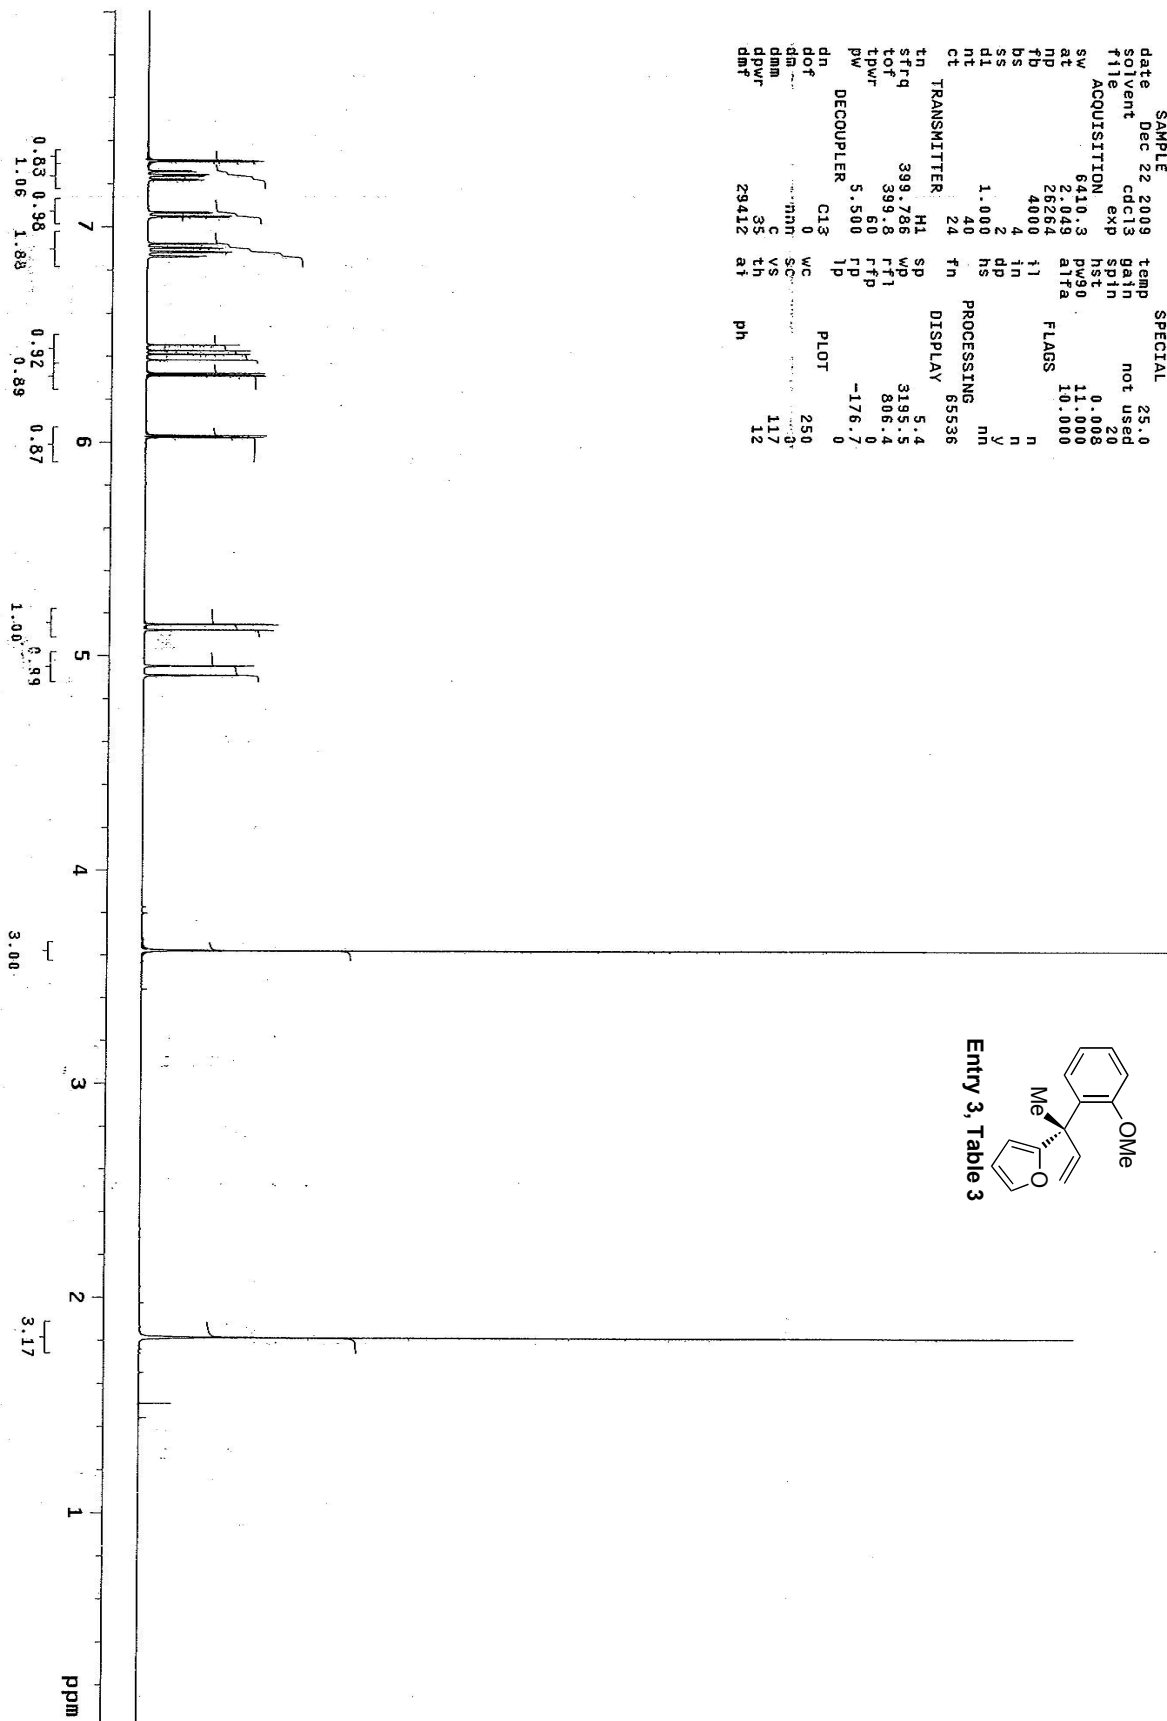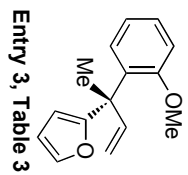



YL-VIII-263-1H  
 expt1 proton

|             |             |         |          |
|-------------|-------------|---------|----------|
| date        | Nov 23 2009 | SAMPLE  | 25.0     |
| solvent     | cdcl3       | SPECIAL | not used |
| file        | exp         | gain    | not used |
| ACQUISITION | 6410.3      | sp1n    | 0.008    |
| sw          | 2.049       | hst     | 11.300   |
| at          | 26264       | pw90    | 10.000   |
| np          | 4000        | alfa    |          |
| fb          | 11          | FLAGS   |          |
| bs          | 4           |         |          |
| ss          | 2           |         |          |
| di          | 1.000       | hs      |          |
| nt          | 40          | dp      |          |
| ct          | 24          | fn      |          |
| TRANSMITTER | H1          | sp      | 1.7      |
| tn          | 399.769     | wp      | 3206.9   |
| strq        | 399.8       | rf1     | 3703.4   |
| tof         | 59          | rfp     | 2902.3   |
| tpwr        | 5.650       | rp      | -46.5    |
| pw          |             | tp      | 0        |
| DECOUPLER   | C13         | PLOT    |          |
| dn          | 0           | wc      | 250      |
| dof         | 0           | sc      | 0        |
| dm          | nn          | vs      | 0        |
| dmm         | C           | th      | 165      |
| dpwr        | 35          | at      | 12       |
| dmf         | 29412       | ph      |          |

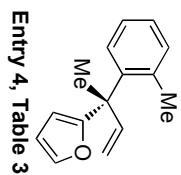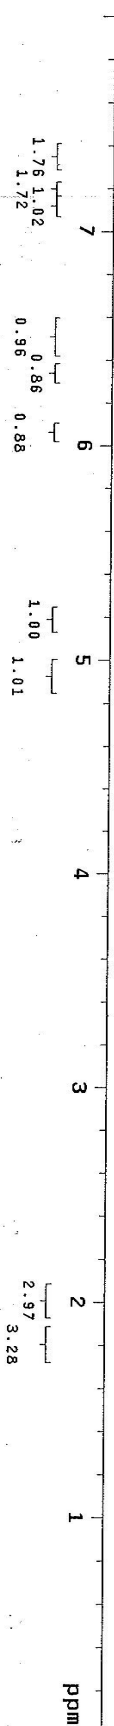

YL-VII-2688  
 expt145 Proton

|             |             |            |          |
|-------------|-------------|------------|----------|
| date        | NOV 25 2009 | temp       | 25.0     |
| solvent     | cdcl3       | gain       | not used |
| file        | exp         | sp1n       | 20       |
| ACQUISITION | 6410.3      | hst        | 0.008    |
| sw          | 2.049       | pw90       | 11.000   |
| at          | 26264       | alpha      | 10.000   |
| np          | 4000        | FLAGS      |          |
| fb          | 4           | n          | n        |
| bs          | 2           | dp         | y        |
| ss          | 2           | hs         | nn       |
| d1          | 1.000       | PROCESSING |          |
| nt          | 40          | fn         | 65536    |
| ct          | 24          | DISPLAY    |          |
| tn          | H1          | sp         | -1.4     |
| stfq        | 399.786     | wp         | 3597.2   |
| tof         | 399.8       | rf1        | 3702.7   |
| tpwr        | 60          | rfp        | 2902.4   |
| pw          | 5.500       | tp         | 143.8    |
| DECOUPLER   | C13         | lp         | 0        |
| dn          | 0           | WC         | 250      |
| dof         | 0           | SC         | 0        |
| dm          | nmn         | VS         | 167      |
| dmm         | C           | th         | 12       |
| dpwr        | 35          | ph         |          |
| dmf         | 29412       | ai         |          |

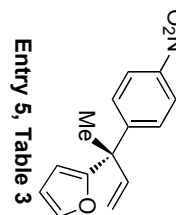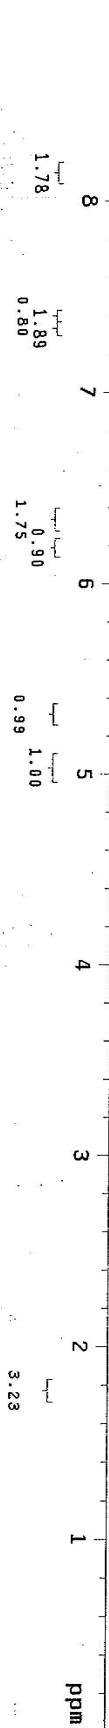

YL-KM--4-238A  
 expt1 Proton

|             |             |            |          |
|-------------|-------------|------------|----------|
| date        | NOV 18 2009 | temp       | 25.0     |
| solvent     | cdcl3       | gain       | not used |
| file        | exp         | spn        | 20       |
| ACQUISITION |             | hst        | 0.008    |
| sw          | 6410.3      | pw90       | 11.000   |
| at          | 2.049       | alpha      | 10.000   |
| np          | 25264       | FLAGS      |          |
| fb          | 4000        | n          | n        |
| bs          | 4           | in         | n        |
| ss          | 2           | dp         | y        |
| di          | 1.000       | hs         | nn       |
| nt          | 40          | PROCESsing | 65536    |
| ct          | 40          | DISPLAY    | 5.2      |
| TRANSMITTER |             | SP         | 3200.2   |
| tn          | H1          | WD         | 3703.4   |
| sfrq        | 399.786     | rfl        | 2902.4   |
| tof         | 399.8       | rfd        | 101.1    |
| tpwr        | 60          | TP         | 0        |
| pw          | 5.500       | IP         |          |
| DECOUPLER   |             | PLOT       | 250      |
| dn          | C13         | WC         | 0        |
| dof         | D           | SC         | 146      |
| dm          | nmn         | SS         | 12       |
| dmm         | C           | tn         |          |
| dpwr        | 35          | ph         |          |
| dmt         | 29412       |            |          |

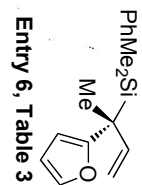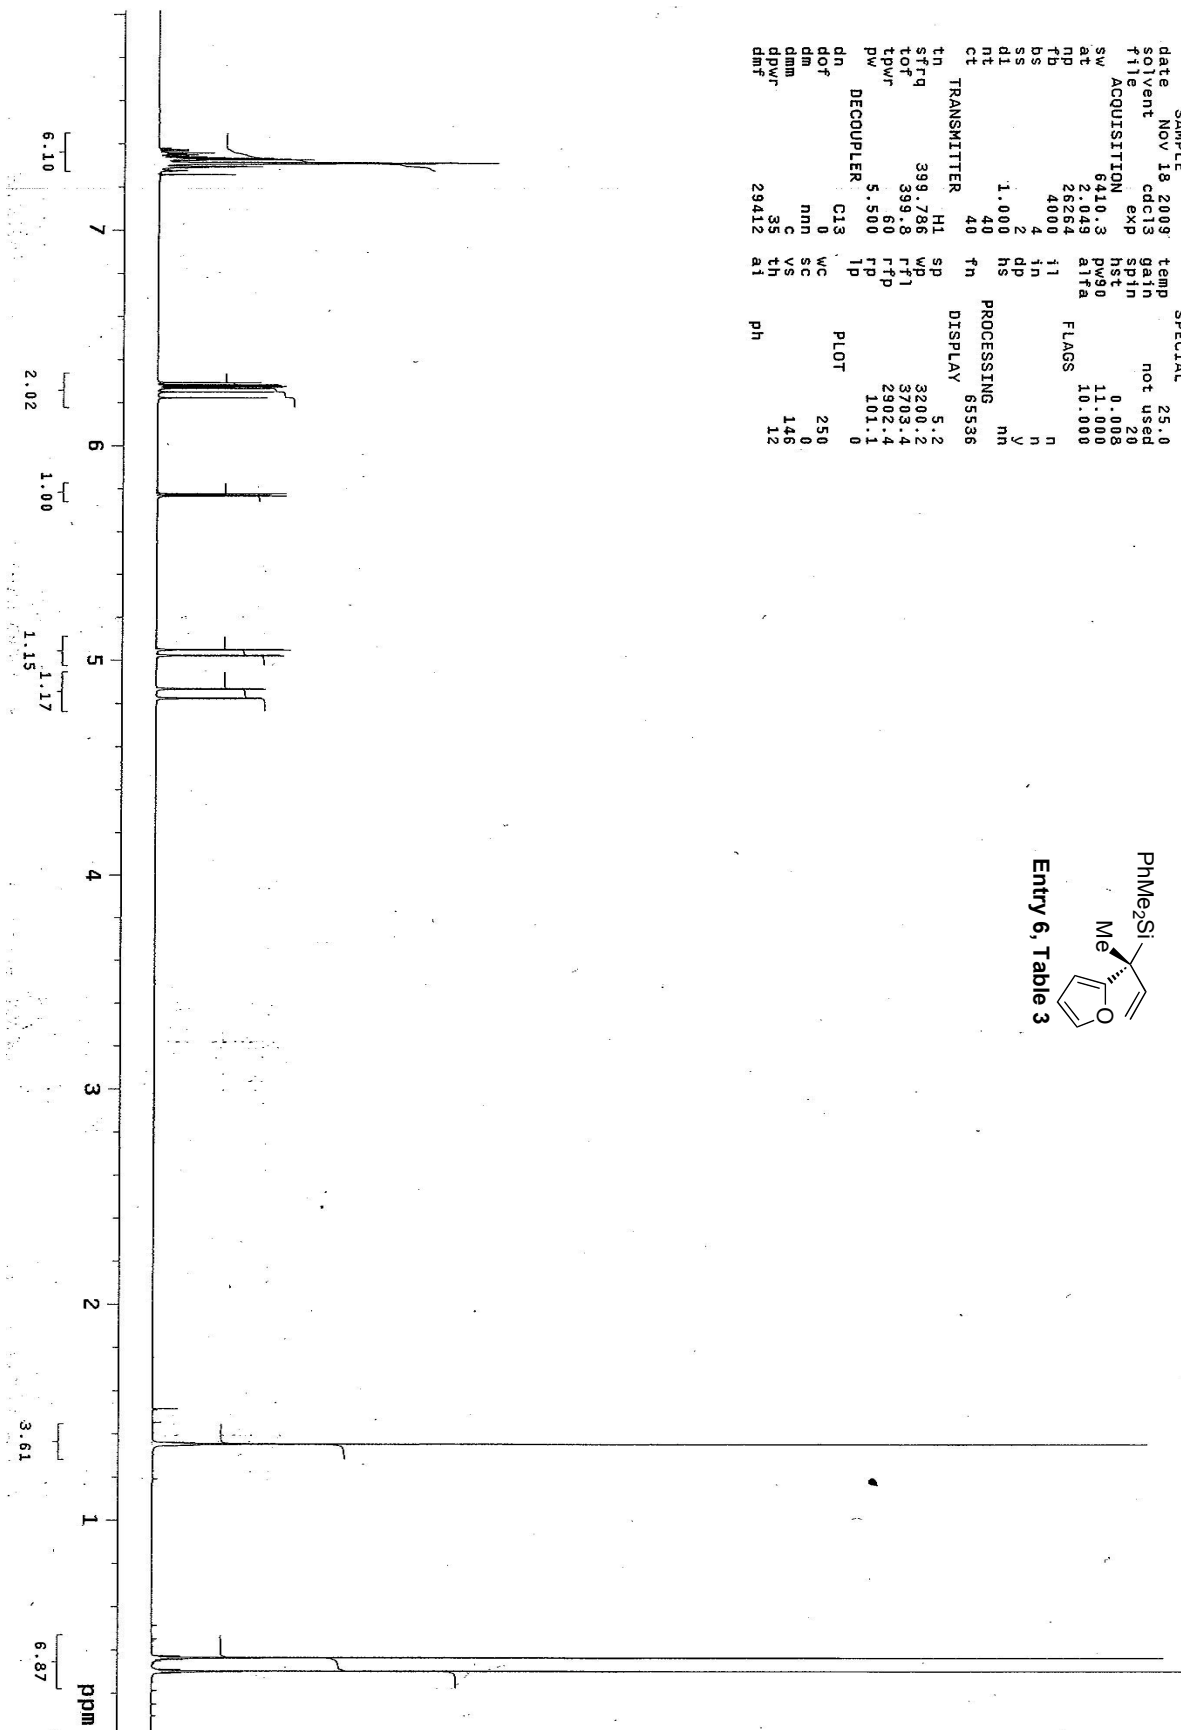

Sample: FG-V-063-B-pdt  
 Sample F103020100708\_07  
 File: s\_20100708\_07\data/cdcl3\_01.fid  
 Acquisition: 29412  
 Pulse Sequence: zgpg30  
 Solvent: cdcl3  
 File: /home/ahh/vnmr  
 RVS: /data/aut\_201~  
 0.07\_07\_01/s\_20100~  
 708\_07\data/cdcl3~  
 01.fid  
 Acquisition: 11  
 SW: 6410.3  
 AT: 2.049  
 NP: 26264  
 FB: 4000  
 BS: 32  
 SS: 2  
 DI: 1.000  
 NT: 8  
 CT: 8  
 TRSMITTER: H1  
 TN: 1p  
 SFRQ: 399.786  
 TOF: 399.8  
 TPWF: 60  
 PW: 5.500  
 DECOUPLER: C13  
 DN: 0  
 DOF: 0  
 DM: nmh  
 DMM: C  
 DPWF: 35  
 DMF: 29412  
 Acquisition: 11  
 SW: 6410.3  
 AT: 2.049  
 NP: 26264  
 FB: 4000  
 BS: 32  
 SS: 2  
 DI: 1.000  
 NT: 8  
 CT: 8  
 TRSMITTER: H1  
 TN: 1p  
 SFRQ: 399.786  
 TOF: 399.8  
 TPWF: 60  
 PW: 5.500  
 DECOUPLER: C13  
 DN: 0  
 DOF: 0  
 DM: nmh  
 DMM: C  
 DPWF: 35  
 DMF: 29412

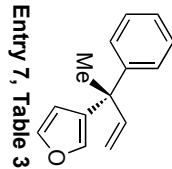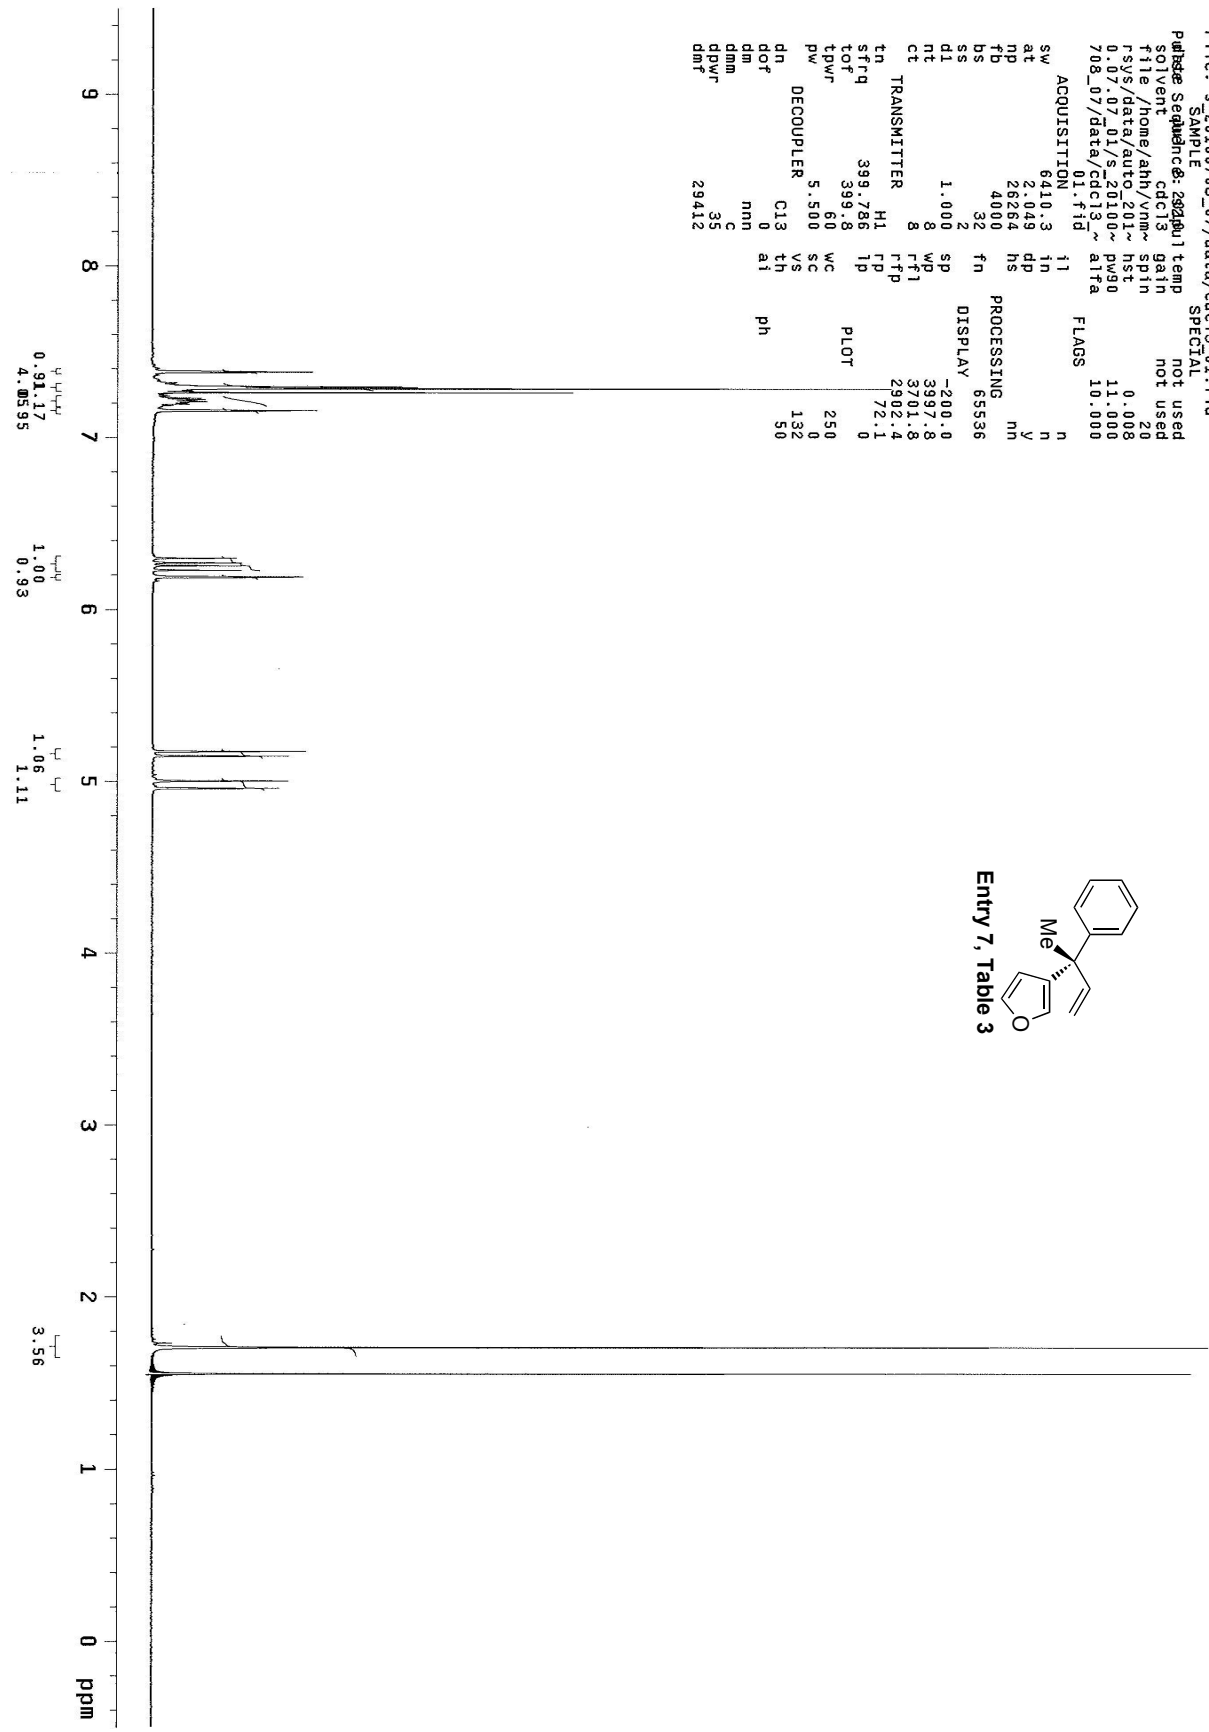



YL-VIII-281B  
exp25 Proton

|             |             |            |          |
|-------------|-------------|------------|----------|
| date        | Dec 15 2009 | temp       | 25.0     |
| solvent     | cdcl3       | gain       | not used |
| file        | cdcl3       | sp1n       | 20       |
| ACQUISITION | exp         | hst        | 0.008    |
| sw          | 6410.3      | pw90       | 11.000   |
| at          | 2.049       | alfa       | 10.000   |
| np          | 28264       | FLAGS      |          |
| fb          | 4000        | 11         | n        |
| bs          | 4           | in         | n        |
| ss          | 2           | dp         | y        |
| d1          | 1.000       | hs         | nn       |
| nt          | 40          | PROCESSING |          |
| ct          | 28          | fn         | 65536    |
| TRANSMITTER |             | DISPLAY    |          |
| tn          | H1          | SP         | 11.1     |
| strq        | 399.786     | WD         | 3195.3   |
| tof         | 399.8       | ft1        | 3703.6   |
| tpwr        | 60          | ftp        | 2902.4   |
| pw          | 5.500       | fd         | 114.6    |
| DECOUPLER   |             | lp         | 0        |
| dn          | C13         | PLOT       |          |
| dof         | 0           | WC         | 250      |
| dam         | nmn         | SC         | 148      |
| dmm         | C           | VS         | 12       |
| qpwr        | 35          | tn         |          |
| dmt         | 29412       | al         |          |
|             |             | ph         |          |

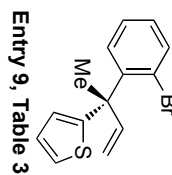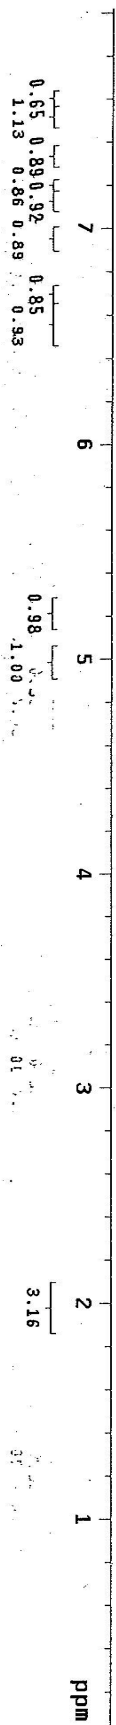

YL-VIII-283A  
 exp25 Proton

|             |             |            |          |
|-------------|-------------|------------|----------|
| date        | Dec 15 2009 | SAMPLE     | 25.0     |
| solvent     | cdcl3       | temp       | not used |
| file        | exp         | gain       | 20       |
| ACQUISITION | hst         | spfn       | 0.008    |
| sw          | 6410.3      | pw90       | 11.000   |
| at          | 2.049       | alpha      | 10.000   |
| np          | 25264       | FLAGS      | n        |
| fb          | 4000        |            | n        |
| bs          | 4           |            | v        |
| ss          | 2           | PROCESSING | nn       |
| di          | 1.000       | hs         |          |
| nt          | 40          | fn         | 65536    |
| ct          | 24          | DISPLAY    | -7.5     |
| TRANSMITTER | H1          | SP         | 3611.4   |
| tn          | 399.786     | WD         | 806.4    |
| stfr        | 399.8       | rfl        | 0        |
| tof         | 50          | rfd        | 125.5    |
| tpwr        | 5.500       | fp         | 0        |
| pw          | DECOUPLER   | lp         | 0        |
| dn          | C13         | PLOT       | 250      |
| dof         | 0           | WC         | 48       |
| dm          | 0           | SC         | 12       |
| dmm         | 35          | VS         |          |
| dpmr        | 29412       | tn         |          |
| dmt         |             | at         | ph       |

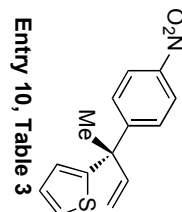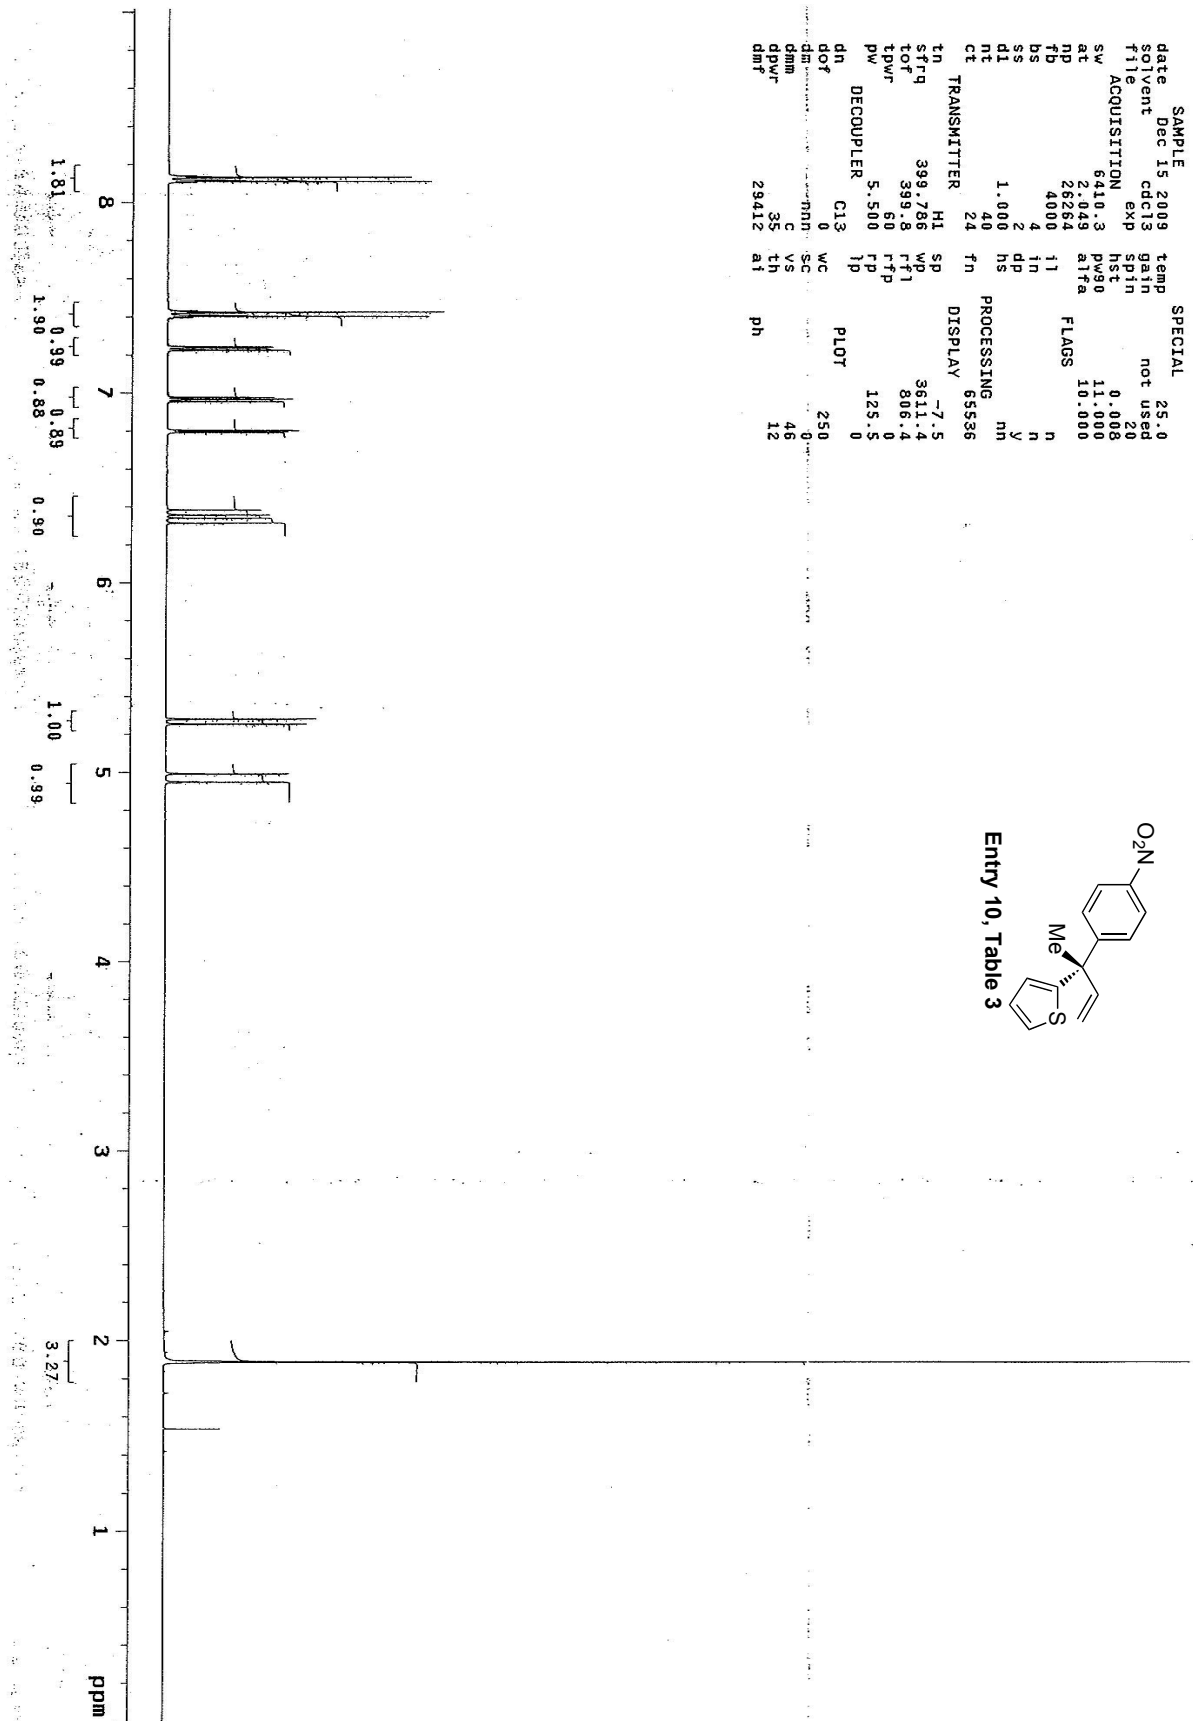

YL-VIII-280A

expt1 Proton

|             |             |         |          |
|-------------|-------------|---------|----------|
| date        | Dec 11 2009 | SAMPLE  | 25.0     |
| solvent     | d2o         | gain    | not used |
| file        | exp         | sp1n    | not used |
| ACQUISITION | 6410.3      | hst     | 0.008    |
| at          | 2.049       | pw90    | 11.300   |
| np          | 26264       | alfa    | 10.000   |
| fb          | 4000        | FLAGS   |          |
| bs          | 4           | n       | n        |
| ss          | 2           | dp      | y        |
| di          | 1.000       | hs      | nn       |
| nt          | 40          | fn      | nn       |
| ct          | 28          | fn      | 65536    |
| TRANSMITTER |             | DISPLAY |          |
| tn          | H1          | sp      | 226.4    |
| stf1        | 399.770     | wp      | 2971.7   |
| tof         | 399.8       | rfl     | 2676.1   |
| tpwr        | 59          | rfl     | 2902.3   |
| pw          | 5.650       | rp      | -62.0    |
| DECOUPLER   | C13         | 1p      | 0        |
| dn          | 0           | PLOT    | 250      |
| dof         | 0           | wc      | 8        |
| dm          | 0           | sc      | 47       |
| dmm         | 35          | vs      | 12       |
| dpwr        | 35          | th      |          |
| dmt         | 29412       | at      |          |
|             |             | ph      |          |

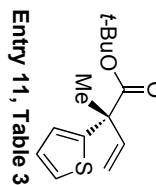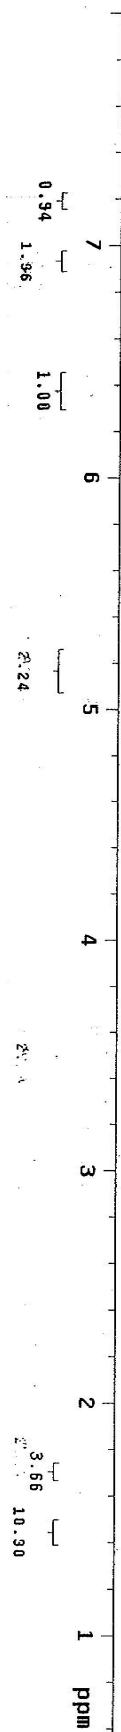



Sample: FG-IV-287-pdt1  
 Sample Path: fpt0100524\_06  
 File: s\_20100524\_06\data/cdcl3\_01.fid  
 SAMPLE SPECIAL  
 Path: SeqMag04: 200qfl1 temp 25.0  
 solvent cdcl3 gain not used  
 file /home/ahh/vnm~ spin 20  
 rsvs/data/auto\_201~ hst 0.008  
 0\_05\_23\_01/5\_20100~ pw90 11.000  
 524\_06/data/cdcl3~ atfa 10.000  
 01.fid  
 ACQUISITION 11  
 SW 6410.3 in n  
 at 2.049 dp y  
 np 26264 hs  
 fb 4000  
 bs 32 fn  
 ss 2  
 d1 1.000 sp  
 nt 8 wp  
 ct 8 rfp  
 TRANSMITTER H1 lp  
 tn 399.736  
 sf-rq 399.8 WC PLOT  
 tof 60 SC 250  
 tpwr 5.500 VS 0  
 pw DECOUPLER C13 th 240  
 dn 0 ai ph 50  
 dof nnn  
 dm  
 dmm C  
 dpwr 35  
 dmf 29412

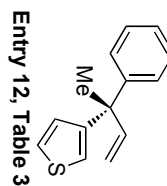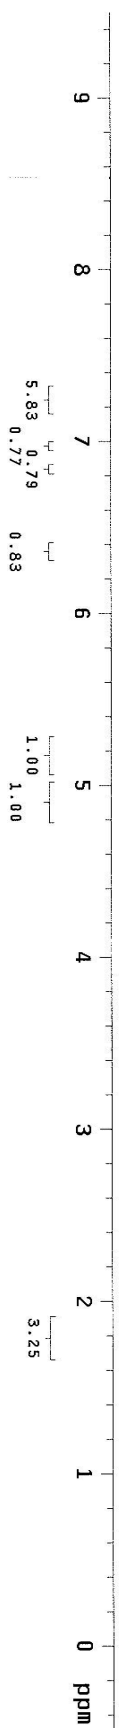





Fig. IV - 270-ppt-1H

```

File: exp3 Proton
Pulse Sequence: s2pu1
date Apr 26 2010 temp 25.0
solvent CDCl3 gain not used
file CDC13 exp 20
sw ACQUISITION 6410.3 hst 0.008
at 2.049 pw90 11.000
np 28264 atfa 10.000
fb 4000 i1 n
bs 4 4 in n
ss 2 dp hs n
di 1.000 2 hs v
nt 40 1.000 hs v
ct 32 fn 65536
TRANSMITTER H1 SP DISPLAY -200.0
sfreq 399.786 wp 3997.8
tof 399.8 rf1 806.4
tpwr 5.500 ffp 1.8
pw DECOUPLER 1p
dn C13 C13 PLOT
dof 0 wc 250
dm 0 nmh 580
dmm 35 c 12
dpwr 29412 at ph
    
```

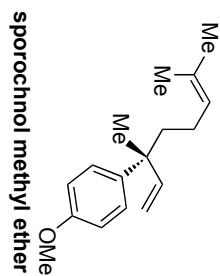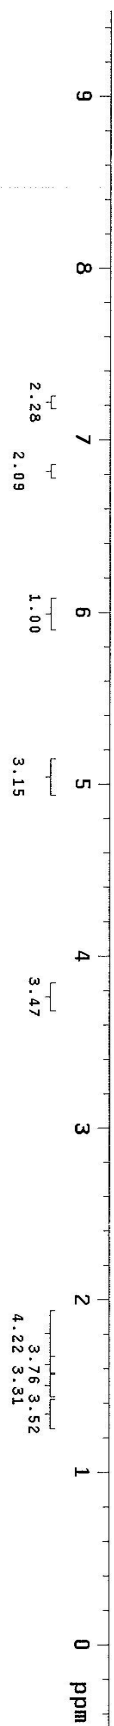

```

Sample: Fc-V-013-pdt
Scan1: 10-294120
File: f:\data\5811\vnms05\data\Fc-V-013-pdt-1H.fid
PulProg: zgpg30
AcqDate: 20080803
SPECIAL: 24.0
=====
SOLVENT: cdcl3      temp: not used
F1 F2: hnu/ah/vnu/   gain: 20
F3 F4: hnu/ah/vnu/   spm: 0.000
V-013-pdt-1H.fid    pw90: 11.000
=====
ACQUISITION: a1f8   FLAGS: 10.000
SW: 6410.3          1)
NUC1: 13C           1)
NUC2: 13C           1)
FD: 4000            1)
BS: 32             hs
SS: 1.002          fm
=====
PROCESSING: mm
SI: 0.5536
NT: 8              fm
CT: 8              sp
=====
DISPLAY: -200.0
=====
TRANSMITTER: H1    WP: 3897.8
P1: 1.00            PD: 2005.4
SFO1: 389.762      RF: 389.762
TOT: 389.8         RP: 175.0
TPWR: 5.60         IP: 0
PW: 5.500          PL0T: 0
=====
DECOUPLER: C13    VC: 380
DOF: 0             VS: 0
DM: mn            TH: 1780
=====
dppr: 35          at: ph
dntf: 29412
    
```

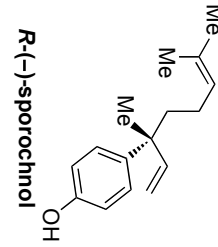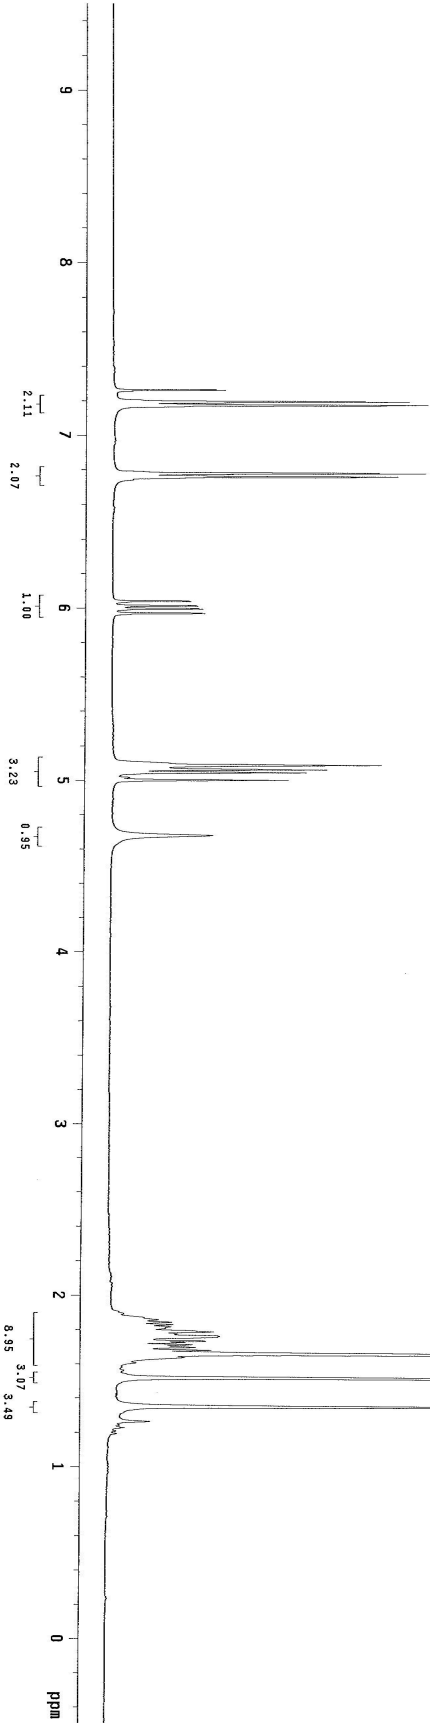

Sample: FG-IV-174-A-pdt-1H  
 SampleID: 710.P120100406\_002  
 File: gaofb/FG-IV-174-A-pdt-1H/Proton\_01.fid  
 SPECIAL

PROCCESSING: 25.0  
 not used  
 0.008  
 11.000  
 10.000

FLAGS  
 -pdt-1H/Proton\_01~

ACQUISITION: f1 i1  
 n y  
 n y  
 n y

PROCESsing: nm  
 65536

DISPLAY: 200.0  
 399.8  
 3702.2  
 2902.4  
 -29.0

TRANSMITTER: H1  
 TP  
 PLOT: 250  
 0  
 0  
 224  
 0

ph

DECOUPLER: C13  
 ai

dn  
 dof  
 dm  
 dmm  
 dpwr  
 dmf

29412

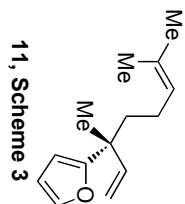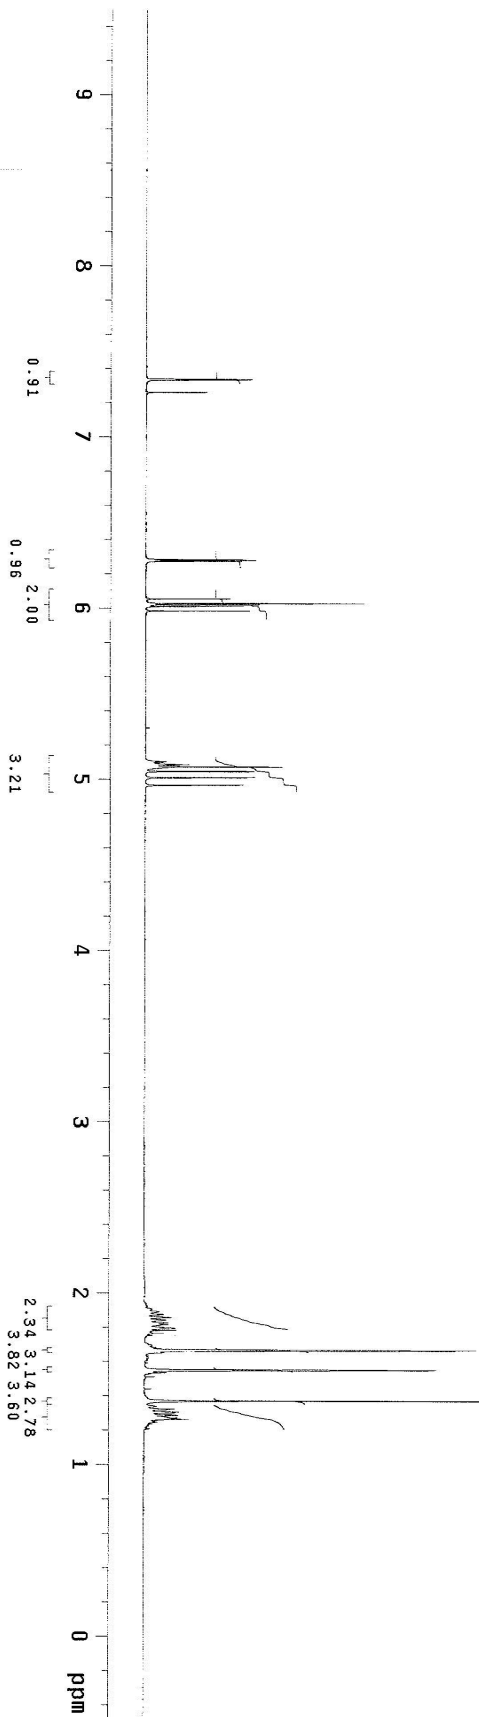

```

Sample: FC-IV-209-pdt-1H
SampleID: 58100420_003
F1F2: 6810/16-IV-209-pdt-1H/proton_01.f1d
P1: 163.843
P2: 125.764
P3: 294.112
P4: 294.112
P5: 294.112
P6: 294.112
P7: 294.112
P8: 294.112
P9: 294.112
P10: 294.112
P11: 294.112
P12: 294.112
P13: 294.112
P14: 294.112
P15: 294.112
P16: 294.112
P17: 294.112
P18: 294.112
P19: 294.112
P20: 294.112
P21: 294.112
P22: 294.112
P23: 294.112
P24: 294.112
P25: 294.112
P26: 294.112
P27: 294.112
P28: 294.112
P29: 294.112
P30: 294.112
P31: 294.112
P32: 294.112
P33: 294.112
P34: 294.112
P35: 294.112
P36: 294.112
P37: 294.112
P38: 294.112
P39: 294.112
P40: 294.112
P41: 294.112
P42: 294.112
P43: 294.112
P44: 294.112
P45: 294.112
P46: 294.112
P47: 294.112
P48: 294.112
P49: 294.112
P50: 294.112
P51: 294.112
P52: 294.112
P53: 294.112
P54: 294.112
P55: 294.112
P56: 294.112
P57: 294.112
P58: 294.112
P59: 294.112
P60: 294.112
P61: 294.112
P62: 294.112
P63: 294.112
P64: 294.112
P65: 294.112
P66: 294.112
P67: 294.112
P68: 294.112
P69: 294.112
P70: 294.112
P71: 294.112
P72: 294.112
P73: 294.112
P74: 294.112
P75: 294.112
P76: 294.112
P77: 294.112
P78: 294.112
P79: 294.112
P80: 294.112
P81: 294.112
P82: 294.112
P83: 294.112
P84: 294.112
P85: 294.112
P86: 294.112
P87: 294.112
P88: 294.112
P89: 294.112
P90: 294.112
P91: 294.112
P92: 294.112
P93: 294.112
P94: 294.112
P95: 294.112
P96: 294.112
P97: 294.112
P98: 294.112
P99: 294.112
P100: 294.112

```

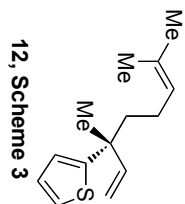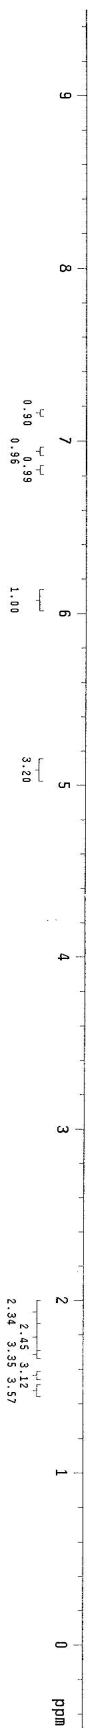









Sample: FG-IV-289-pdt  
 Sample FID: FID01010524\_08  
 File: s\_20100524\_08\data/cdc13\_01.fid  
 Pubs: Sequence: 292401 temp SPECIAL 25.0  
 Solvent: cdc13 gain not used  
 File: /home/ah/vnmr spin 20  
 Rsys: /data/auto\_201~ hst 0.008  
 0.05\_23\_01/s\_20100~ pw90 11.000  
 524\_08\data/cdc13\_~ a1fa 10.000  
 01.fid  
 ACQUISITION  
 sw 6410.3 f1  
 at 2.049 dp in  
 np 26264 hs  
 fb 4000  
 bs 32 fn  
 ss 2  
 d1 1.000 sp  
 nt 8 wd  
 ct 8 rfl  
 TRANSMITTER 8 rfp  
 tn H1 tp  
 sfreq 399.786 1p  
 lot 399.8 WC PLOT  
 tpwr 60 SC 250  
 pw 5.500 VS 155  
 DECOUPLER C13 tn  
 dn 0 a1 ph  
 dof 0  
 dm nnn  
 dmm C  
 dpwr 35  
 dmf 29412

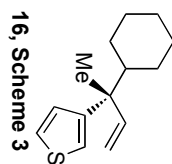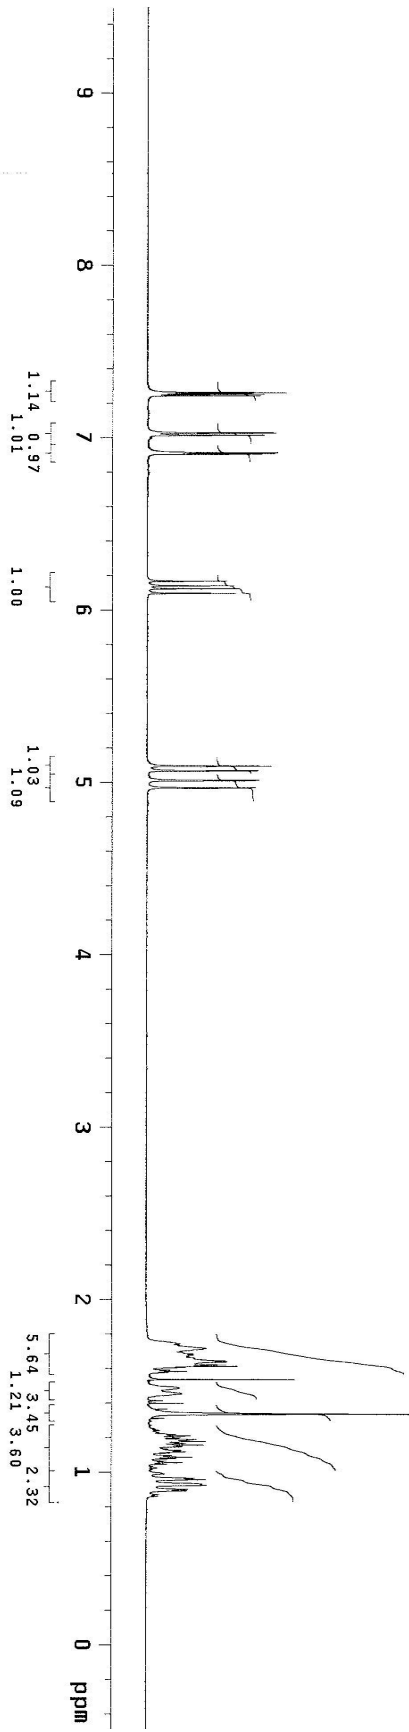

Supplement: NIHMS416939-supplement-Supporting_Information.pdf [file NIHMS416939-supplement-Supporting_Information.pdf]
